# Supplementary material for: Self-domestication in Homo sapiens: Insights from comparative genomics
Source: PubMed Central journal article supplement (PMC5646786; doi:10.1371/journal.pone.0185306), 2017-10-18

**S1 Fig. Networks of overlapping genes (a) between domesticated species and (b) between AMH and domesticated species, generated using QIAGEN Ingenuity Pathway Analysis software.**

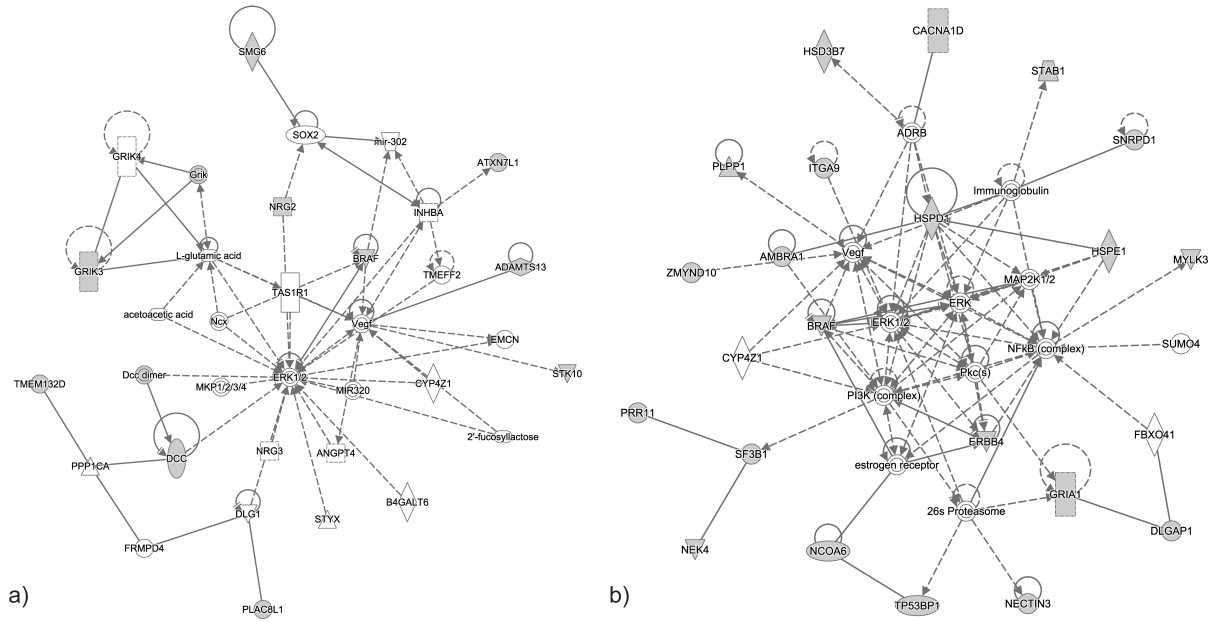

Supplement: pone.0185306.s001.pdf [file pone.0185306.s001.pdf]
