# Supplementary material for: Self-domestication in Homo sapiens: Insights from comparative genomics
Source: PubMed Central journal article supplement (PMC5646786; doi:10.1371/journal.pone.0185306), 2017-10-18
Supplement: pone.0185306.s005.pdf [file pone.0185306.s005.pdf]

S4 Table. (A) Gene lists from the sources for AMH, domesticates, and great apes

| AMH POOL                                                                 |                                       |                                                   |                                    | DOMESTICATES POOL  |           |                                                                   |             |                                             |                                                   | GREAT APE POOL (Cagan et al. 2016)   |                                        |            |
|--------------------------------------------------------------------------|---------------------------------------|---------------------------------------------------|------------------------------------|--------------------|-----------|-------------------------------------------------------------------|-------------|---------------------------------------------|---------------------------------------------------|--------------------------------------|----------------------------------------|------------|
| <i>Peyrègne et al. 2016</i><br>(SF1, SF2, Table 2<br>and Table S7) [375] | <i>Racimo 2016</i> (Table<br>3) [326] | <i>Prüfer et al. 2014</i><br>(Table S19b.1) [108] | TOTAL AMH (no<br>duplicates) [742] | DOG [229]          | CAT [291] | CATTLE [78]                                                       | HORSE [109] | TOTAL DOMESTICATES (no duplicates)<br>[691] | Chimp ( <i>P.t.</i><br><i>troglodytes</i> ) [415] | Orango ( <i>P. abelii</i> )<br>[500] | (Gorilla) <i>G.g. gorilla</i><br>[426] |            |
| ABCE1                                                                    | ABCE1                                 | ABCE1                                             | ABCE1                              | ABAT               | ABHD1     | ABCC4-like                                                        | ABCA10      | ABAT                                        | dog                                               | ABLIM2                               | ABCC6                                  | AADACL3    |
| ABHD3                                                                    | ABHD14A                               | ABHD3                                             | ABHD14A                            | ACA64              | ACOT11    | ADAM2                                                             | ABCA5       | ABCA10                                      | horse                                             | ACOT2                                | ACOX3                                  | ABCA13     |
| ACTG1P4                                                                  | ABHD14B                               | AIG1                                              | ABHD14B                            | ACMSD              | ACOT13    | ADAMTS13                                                          | ABCB10      | ABCA5                                       | horse                                             | ACSL6                                | ACTBP13                                | ACAN       |
| ADRA2A                                                                   | ABHD3                                 | AMBRA1                                            | ABHD3                              | ACSM5              | ACOT8     | ANK1                                                              | ACAD8       | ABCB10                                      | horse                                             | ADAM18                               | ADAM12                                 | ACTBP13    |
| ADSL                                                                     | ACE                                   | ANAPC10                                           | ACE                                | ACSS2              | ACOX2     | ASTN2                                                             | ACSF3       | ABCC4-like                                  | cattle                                            | ADAM20P3                             | ADAMDEC1                               | ACTN3      |
| AGO1                                                                     | ACTG2                                 | ARHGAP1                                           | ACTG1P4                            | ADRB2              | ACOX3     | ATL1                                                              | ACTA1       | ABHD1                                       | cat                                               | ADAMTSL4                             | ADAMTS18                               | ADAM20P3   |
| AGO3                                                                     | ACY1                                  | ATG13                                             | ACTG2                              | AHCY               | ADAMDEC1  | CACNA1C                                                           | AKAP1       | ACA64                                       | dog                                               | ADGB                                 | ADAMTS8                                | ADAM24P    |
| AIDA                                                                     | ADAL                                  | BAG4                                              | ACY1                               | AHCYL2             | ADAMTS13  | CAV1                                                              | ALDH1L2     | ACAD8                                       | horse                                             | ADK                                  | ADAMTSL3                               | ADAMTSL1   |
| AKAP8                                                                    | ADRA2B                                | BCAP29                                            | ADAL                               | LDH18A1            | ADAMTSL3  | CAV2                                                              | ALK         | ACMSD                                       | dog                                               | ADORA2B                              | ACL                                    | ADCY8      |
| AKAP8L                                                                   | ADSL                                  | BEAN1                                             | ADRA2A                             | ANKS4B             | AK1       | CDH1                                                              | AMBRA1      | ACOT11                                      | cat                                               | AGBL4                                | AGMO                                   | ADRBK1     |
| AKR7A2P1                                                                 | AHDC1                                 | BIRC2                                             | ADRA2B                             | AFOPT1             | ALDH16A1  | CLCA3                                                             | ANKDD1A     | ACOT13                                      | cat                                               | AGGF1P4                              | AGO4                                   | AF241725.1 |
| AL122050                                                                 | AHSA2                                 | C11orf80                                          | ADSL                               | ARID1B             | ALSC2R12  | RLB2                                                              | ARL6P1      | ACOT8                                       | cat                                               | AIDA                                 | AK7                                    | AF241725.6 |
| ALG9                                                                     | ALAS1                                 | C1orf190                                          | AHSA2                              | ARL9               | AMACR     | CUL1                                                              | ASAP1       | ACOX2                                       | cat                                               | AKR1C6P                              | AKAP6                                  | AFM        |
| AMPH                                                                     | ALMS1                                 | CBL                                               | AGO3                               | ART3               | ANKRD2    | ANR1                                                              | ASTN1       | ACOX3                                       | cat                                               | AKR1E2                               | AKNAD1                                 | AGMO       |
| AMY1A                                                                    | ANAPC10                               | CCDC153                                           | AHDC1                              | ASIP               | ANKRD49   | DCST1                                                             | B3GALT      | ACSF3                                       | horse                                             | ALK                                  | ALDH4A1                                | ANKRD44    |
| AMY1B                                                                    | ANKRD30A                              | CEBPD                                             | AHSA2                              | ATXN7L1            | ANKRD50   | DSCAM                                                             | BRAF        | ACSM5                                       | dog                                               | AMBR1                                | ALK                                    | ANQ4       |
| AMY1C                                                                    | ANKRD30B                              | CHRM4                                             | AIDA                               | BAG5               | APEH      | EMC2                                                              | C15orf60    | ACSS2                                       | dog                                               | AMT                                  | ANKRD17                                | APP        |
| AMY2A                                                                    | ANKRD32                               | CKLF                                              | AIG1                               | BTAF1              | APOBEC4   | ERBB4                                                             | C17orf67    | ACTA1                                       | horse                                             | ANKRD26P3                            | ANO10                                  | AQP2       |
| AMY2B                                                                    | ANKRD55                               | CLASP2                                            | AKAP8                              | C7orf72            | ARHGAP26  | EYA1                                                              | C4orf33     | ADAM2                                       | cattle                                            | APOOP2                               | ANQ5                                   | AQP5       |
| ANAPC10                                                                  | ARHGAP15                              | CMTM1                                             | AKAP8L                             | CADM2              | ARID3B    | FAM172A                                                           | C5orf9      | ADAMDEC1                                    | cat                                               | AQP10                                | ANPEP                                  | ARHGAP27   |
| ANK2                                                                     | ARID1A                                | COG5                                              | AKR7A2P1                           | CALCB              | ASB11     | FCRL4                                                             | C9orf89     | ADAMTSL3                                    | cat, cattle                                       | ARNT2                                | AP3S1                                  | ARHGAP39   |
| ANO10                                                                    | ASTL                                  | COQ10B                                            | AL122050                           | GRIK3              | CBD118    | ATXN7L1                                                           | CACNA1D     | ADAMTSL3                                    | cat                                               | ARPC3                                | ARHGAP24                               | ARL4A      |
| ANO3                                                                     | B2M                                   | CTPS                                              | ALAS1                              | CBD121             | BARD1     | HMG2                                                              | CDK5RAP1    | ADRB2                                       | dog                                               | ASH1L                                | ARL2BPP10                              | ARMC4      |
| ANXA2                                                                    | BAP1                                  | DDHD2                                             | ALG9                               | CBD122             | BCAP31    | HS3ST4                                                            | CDKL3       | AHCY                                        | dog                                               | ATG13                                | ARNT                                   | ARNT       |
| ARSJ                                                                     | BCAP29                                | DGKZ                                              | ALMS1                              | CCDC67             | BPI       | KDR                                                               | CNTN6       | AHCYL2                                      | dog                                               | ATG4C                                | AS1                                    | ATP5J2     |
| ASAP2                                                                    | BMS1                                  | DNAJA2                                            | AMBRA1                             | CCDC82             | BRAF      | KIF6-like                                                         | COIL        | AK1                                         | cat                                               | ATP6V0E2                             | ATP2A2                                 | ATRN1L     |
| ASIC2                                                                    | BZRAP1                                | DPYSL5                                            | AMPH                               | CCNJ               | BRCA1     | KIT                                                               | COL22A1     | AKAP1                                       | horse                                             | ATP8B2                               | ATP8A2P3                               | AUTS2      |
| ATG10                                                                    | C17orf47                              | DUS4L                                             | AMY1A                              | CCNT2              | C11orf54  | LAMC3                                                             | COMMD0      | ALDH16A1                                    | cat                                               | ATRLN1                               | ATRN1L                                 | BAD        |
| ATP1A3                                                                   | C19orf44                              | EHBP1                                             | AMY1B                              | CDRT1              | C11orf63  | LILRA6                                                            | CRTC3       | ALDH18A1                                    | dog                                               | AUTS2                                | ATXN2                                  | BAI3       |
| ATXN10                                                                   | C1orf172                              | ESCO1                                             | AMY1C                              | CDRT4              | C1orf71   | LIN28B                                                            | C-SKI       | ALDH1L2                                     | horse                                             | AUTS2                                | AUTS2                                  | BANK1      |
| BAI3                                                                     | C2orf47                               | FAM150A                                           | AMY2A                              | CETN3              | C1orf109  | LRP1B                                                             | DCC         | ALK                                         | horse                                             | BCAS2                                | BARD1                                  | BBS1       |
| BAP1                                                                     | C2orf69                               | FLJ35017                                          | AMY2B                              | CKB                | C22orf31  | LTF                                                               | DLGAP1      | ALS2CR12                                    | cat                                               | BCL9                                 | BCAT1                                  | BCAR4      |
| BBIP1                                                                    | C2orf78                               | FLJ39294                                          | ANAPC10                            | CLEC5A             | C2orf40   | MAFK                                                              | DNAH9       | AMACR                                       | cat                                               | BSN                                  | BCR                                    | BICC1      |
| BCAP29                                                                   | C3orf18                               | GPR22                                             | ANK2                               | COA5               | C2orf62   | MAGEA13P-like                                                     | EEA1        | AMBRA1                                      | horse                                             | BNBR1                                | BCYRN1                                 | BTD9       |
| BCAR3                                                                    | C3orf35                               | GPT2                                              | ANKRD30A                           | COG6               | C3orf62   | MC1R                                                              | FAF1        | ANK1                                        | cattle                                            | C10orf137                            | BIVM                                   | C10orf90   |
| BCL2                                                                     | CACNA1D                               | GREB1L                                            | ANKRD30B                           | COL11A1            | COL11A1   | C8B                                                               | MGC12345    | FANCA                                       | horse                                             | C10orf153                            | BMP6P1                                 | C11orf68   |
| BIRC2                                                                    | CACNA2D2                              | GRID2                                             | ANKRD32                            | COQ10B             | C9orf96   | MITF                                                              | FBXO31      | ANKRD2                                      | cat                                               | C16orf87                             | BNIP3P1                                | C11orf80   |
| BRAF                                                                     | CALR3                                 | HARBI1                                            | ANKRD35                            | CPPEB3             | CAGE1     | NCAPG                                                             | FCHSD2      | ANKRD49                                     | cat                                               | C1orf123                             | BNIP1                                  | C11orf86   |
| BRD4                                                                     | CAPN3                                 | HBP1                                              | ANO10                              | CRYM               | CASP7     | NDUFB1                                                            | FOXJ3       | ANKRD50                                     | cat                                               | C1orf63                              | BSN                                    | C12orf35   |
| BROX                                                                     | CASC4                                 | HIVEP2                                            | ANO3                               | CUX2               | CBX2      | NPAS3                                                             | GAK         | ANKS4B                                      | dog                                               | C21orf59                             | BTNL2                                  | C16orf52   |
| C11orf1                                                                  | CATSPER2                              | HSDL2                                             | ANXA2                              | CXCL10             | CCDC38    | NPTX1                                                             | GNPTAB      | APEH                                        | cat                                               | C2orf78                              | C10orf115                              | C16orf58   |
| C16orf87                                                                 | CBLL1                                 | HSPD1                                             | ARHGAP1                            | CYFIP1             | CCDC64B   | NR2F2                                                             | GRID1       | APOBEC4                                     | cat                                               | C3orf52                              | C16orf59                               | C16orf59   |
| C18orf42                                                                 | CCDC53                                | HSPE1                                             | ARHGAP15                           | CYP26A1            | CCDC70    | NRG2                                                              | IGSF3       | APOPT1                                      | cat                                               | C3orf62                              | C12orf60                               | C1orf63    |
| C1orf112                                                                 | CCNDBP1                               | IL7                                               | ARID1A                             | CYP26C1            | CD27      | NRG4                                                              | IGSF9B      | ARHGAP26                                    | cat                                               | C3orf84                              | C14orf23                               | C1orf68    |
| C1G7NF5                                                                  | CCNH                                  | INA                                               | ARSJ                               | DDC                | CD48      | NRXN1                                                             | JAM3        | ARID1B                                      | dog                                               | C7orf61                              | C16orf95                               | C2orf78    |
| CACNA2D1                                                                 | CCNO                                  | INPP5F                                            | ASAP2                              | DEFB119            | CD93      | OLIG1                                                             | JPH3        | ARID3B                                      | cat                                               | C9orf135                             | C18orf34                               | C3orf115   |
| CADPS                                                                    | CCT7                                  | ITFG1                                             | ASIC2                              | DEFB122            | CDH6      | OR13C8                                                            | KCNK10      | ARL6IP1                                     | horse                                             | CACNA2D3                             | C1DP2                                  | C4BPAP1    |
| CADPS2                                                                   | CD164L2                               | LRFN4                                             | ASTL                               | DNAH3              | CELA1     | OR51A7                                                            | KIAA0556    | ARL9                                        | dog                                               | CASP14                               | C1DP4                                  | C5orf60    |
| CALN1                                                                    | CDAN1                                 | LRRC41                                            | ATG10                              | DNAJA1             | CENPE     | ORF olfactory receptor family cluster (Chromosome 7, BP 15246693) | KIAA1549    | ART3                                        | dog                                               | CASQ2                                | C1orf129                               | C7orf50    |
| CAMK1G                                                                   | CDC20B                                | LSM1                                              | ATG13                              | DOCK2              | CENPM     | ORF olfactory receptor family cluster (Chromosome 7, BP 15331252) | KLHDC4      | ASAP1                                       | horse                                             | CCDC102B                             | C1orf132                               | C8orf82    |
| CAPN5                                                                    | CDC42EP3                              | LSR7                                              | ATP1A3                             | DTD1               | CEP68     | ORF olfactory receptor family cluster (Chromosome 7, BP 43710839) | LCLAT1      | ASB11                                       | cat                                               | CCDC34                               | C1orf170                               | CABS1      |
| CAPS                                                                     | CHERP                                 | MAP7                                              | ATXN10                             | EIF2S2             | CEP97     | ORF olfactory receptor family cluster (Chromosome 7, BP 43810382) | LEPREL1     | ASIP                                        | dog                                               | CCDC36                               | C3orf20                                | CACNA1E    |
| CASP16P                                                                  | CISH                                  | MCAM                                              | B2M                                | ELF2               | CHMP4B    | PCDH18                                                            | LMF1        | ASTN1                                       | horse                                             | CCDC58P3                             | C4orf22                                | CACNA2D2   |
| CBLN4                                                                    | CKMT1A                                | MCM4                                              | BAG4                               | ENSCAFG00000018988 | CIB4      | PEX7                                                              | MAP3K4      | ASTN2                                       | cattle                                            | CCDC69                               | C6orf10                                | CAMKV      |
| CCDC188                                                                  | CKMT1B                                | MCMBP                                             | BAI3                               | ENSCAFG00000023289 | CLDN17    | PLAC8L1                                                           | MAPK10      | ATL1                                        | cattle                                            | CCDC71                               | C7orf57                                | CBFB       |
| CCDC192                                                                  | CLDN10                                | MDK                                               | BAP1                               | ENTPD1             | CLEC5A    | PLAG1                                                             | MARCH10     | ATXN7L1                                     | dog, cat                                          | CCDC91                               | C8orf56                                | CCDC129    |
| CCNJL                                                                    | CNGA3                                 | MEGF10                                            | BBIP1                              | EPS15              | CLK3      | Pol                                                               | MATN2       | B3GALT                                      | horse                                             | CCDC91                               | C9orf11                                | CCDC146    |
| CDC27                                                                    | COA5                                  | MIB1                                              | BCAP29                             | ETNPPL             | CNGA2     | PVRL3                                                             | MSI2        | CDHR4                                       | dog                                               | CCDC91                               | C9orf153                               | CCDC85B    |
| CDH10                                                                    | COG5                                  | MKLN1                                             | BCAR3                              | F9                 | COL6A3    | RNF144B                                                           | MYBPC1      | BARD1                                       | cat                                               | CDK8                                 | C9orf3                                 | CCDC87     |
| CEBPD                                                                    | CSGALNACT2                            | MOB4                                              | BCL2                               | FABP5              | COL9A3    | ROBO1                                                             | NCAPD3      | BCAP31                                      | cat                                               | CDKAL1                               | CAND2                                  | CCNF       |
| CELF4                                                                    | CTDSP2                                | NCOA5                                             | BEAN1                              | FAM107B            | ROCC      | SEMA6A                                                            | NID2        | BPI                                         | cat                                               | CENPQ                                | CAPRN2                                 | CCS        |
| CEP41                                                                    | CYB561                                | NETO2                                             | BIRC2                              | FAM172A            | CSPP1     | SETMAR                                                            | NINJ1       | BRAF                                        | cat, horse                                        | CGNL1                                | CAPZB                                  | CD1B       |
| CEP57L1                                                                  | CYB561D2                              | NRG3                                              | BMS1                               | FAM40B             | CITTN     | SLC35D1                                                           | NIPBL       | BRCA1                                       | cat                                               | CHAT                                 | CARD16                                 | CD2BP2     |
| CHODL                                                                    | DDX4                                  | NLK                                               | BRAF                               | FBXO10             | CYB5R1    | SLC41A2                                                           | NR3C2       | BTAF1                                       | dog                                               | CHRM4                                | CATSPERG                               | CD300LB    |
| CLSTN1                                                                   | DGUOK                                 | NLRX1                                             | BRD4                               | FBXW10             | CYP1A1    | SLC6A1                                                            | NT5DC2      | C11orf54                                    | cat                                               | CLC                                  | CCDC15                                 | CD320      |

| AMH POOL                                                          |                                |                                            |                                    | DOMESTICATES POOL |           |             |             |                                             |                                                    | GREAT APE POOL (Cagan et al. 2016)   |                                         |           |
|-------------------------------------------------------------------|--------------------------------|--------------------------------------------|------------------------------------|-------------------|-----------|-------------|-------------|---------------------------------------------|----------------------------------------------------|--------------------------------------|-----------------------------------------|-----------|
| Peyrégne et al. 2016<br>(SF1, SF2, Table 2<br>and Table S7) [375] | Racimo 2016 (Table<br>3) [326] | Prüfer et al. 2014<br>(Table S19b.1) [108] | TOTAL AMH (no<br>duplicates) [742] | DOG [229]         | CAT [291] | CATTLE [78] | HORSE [109] | TOTAL DOMESTICATES (no duplicates)<br>[691] | Chimp ( <i>P. t.</i><br><i>troglodytes</i> ) [415] | Orango ( <i>P. abelii</i> )<br>[500] | (Gorilla) <i>G. g. gorilla</i><br>[426] |           |
| CNTNAP4                                                           | DHDDS                          | NUP1P1                                     | BROX                               | FBXW11            | CYP1A2    | SNRPD1      | NTM         | C11orf63                                    | cat                                                | CLN8                                 | CCDC174                                 | CDH13     |
| COG5                                                              | DHX29                          | OTUD4                                      | BZRAP1                             | FGD6              | CYP27B1   | SPTAN1      | NUMB        | C15orf60                                    | horse                                              | CNTNAP4                              | CCT7P2                                  | CDH9      |
| COL11A1                                                           | DNAH1                          | OTX1                                       | FGF13                              | FGF13             | DACT1     | STGK10      | NUP133      | C16orf71                                    | cat                                                | COL11A2P1                            | CD163                                   | CDK19     |
| CORO2B                                                            | DNAJC3                         | PC                                         | C11orf80                           | FGF18             | DAFK1     | TAOK1       | OPCML       | C17orf67                                    | horse                                              | CPNE4                                | CD163L1                                 | CDK20     |
| CR2                                                               | DOCK3                          | PCDH17                                     | C16orf87                           | FGFBP3            | DCC       | TAS2R16     | PCSK5       | C1orf109                                    | cat                                                | CPSF3L                               | CD1A                                    | CENPQ     |
| CSMD2                                                             | DRAM1                          | PCGF6                                      | C17orf47                           | FHL1              | DNAJB9    | TFOP2L1     | PDE4DIP     | C22orf31                                    | cat                                                | CPT2                                 | CD46                                    | CENPT     |
| CSPG5                                                             | DUS4L                          | PDZD3                                      | C18orf42                           | FOX1              | DNT1P2    | TMEM132D    | PDE5A       | C2orf40                                     | cat                                                | CERS5                                | CD5L                                    | CERS5     |
| CTNNB1                                                            | DUSP11                         | PHKB                                       | C19orf44                           | FRMD6             | DPEP3     | TNFRSF9     | PDRG1       | C2orf62                                     | cat                                                | CTRL                                 | CD27                                    | CHIAP1    |
| CTNND2                                                            | DUSP7                          | PODXL                                      | C1orf112                           | FRMPD1            | DUSP19    | ULBP3       | PHF2        | C3orf62                                     | cat                                                | CTTNBP2NL                            | CDC42BPA                                | CHIAP2    |
| CTXN3                                                             | DZIP1                          | POMGNT1                                    | C1orf172                           | GALR1             | ECHDC1    | UNC93A      | PHF20       | C4orf33                                     | horse                                              | CXCL3                                | CDH12                                   | CHTF18    |
| CXCL13                                                            | EGR4                           | PPAPDC1B                                   | C1orf190                           | GAPDHS            | EDC3      | WVDE        | PIK3C3      | C5orf15                                     | horse                                              | CXCC11                               | CDH17                                   | CICP17    |
| CXCL3                                                             | EHBP1                          | PRDM2                                      | C1QTNF5                            | GGT7              | EHBP1L1   | PLXNA4      | POP1        | C7orf72                                     | dog                                                | CYP21A2                              | CDH19                                   | CLEC18A   |
| DAPP1                                                             | EIF3J                          | PRKDC                                      | C2orf47                            | GLRA1             | ENKUR     | POP1        | C8B         | C9orf89                                     | cat                                                | DAG1                                 | CDK8                                    | CLSTN3    |
| DBILSP2                                                           | ELL3                           | QSER1                                      | C2orf69                            | GNGL0             | ENTPD7    | PPM1D       | PPP2CA      | C9orf89                                     | horse                                              | DAP3P1                               | CECR7                                   | CNIH2     |
| DGCR8                                                             | EPB42                          | RAD54L                                     | C2orf78                            | GNGL4             | EPHB4     | PRKC2       | PRMT3       | C9orf96                                     | cat                                                | DCP2                                 | CETN1                                   | CNTNA     |
| DHRS12                                                            | EPM2AIP1                       | RB1CC1                                     | C3orf18                            | GP2               | ETV4      | PRKCZ       | CACNA1C     | C9orf96                                     | cattle                                             | DENND2C                              | CHCHD6                                  | CNTNAP5   |
| DLGAP1                                                            | EPS15L1                        | RBM14                                      | C3orf35                            | GPR139            | FAM3      | PRMT3       | CACNA1D     | C9orf96                                     | horse                                              | DKGZ                                 | CHRNA6                                  | COL14A1   |
| DNAH1                                                             | ESCO1                          | RBM4                                       | CACNA1D                            | GPRC5B            | FAM114A2  | PSMB7       | CADM2       | C9orf96                                     | dog                                                | DHFRP2                               | CHST11                                  | COL19A1   |
| DNAJB4                                                            | ESM1                           | RBM4B                                      | CACNA2D1                           | GRIK3             | FAM131B   | PTPN4       | CAGE1       | C9orf96                                     | cat                                                | P2TA1N                               | DHX57                                   | COL24A1   |
| DTNA                                                              | FAHD2A                         | RCE1                                       | CACNA2D2                           | HERC2             | FAM179A   | RHPN1       | CALCB       | C9orf96                                     | dog                                                | DIAPH3                               | CLCC1                                   | COX14     |
| DUS4L                                                             | FAM172A                        | RFTN2                                      | CADPS                              | HIPK2             | FAM69A    | SCPEP1      | CASP7       | C9orf96                                     | cat                                                | DIO2                                 | CLEC2D                                  | CNP2E     |
| DYNC1H1                                                           | FAM46B                         | RSPO3                                      | CADPS2                             | HOPX              | FANCB     | SEC24A      | CAV1        | C9orf96                                     | cattle                                             | DISC1FP1                             | CLECL1                                  | CPSF4     |
| DYSF                                                              | FAM83F                         | SCMH1                                      | CALN1                              | HSPD1             | FAT4      | SEC63       | CAV2        | C9orf96                                     | cattle                                             | DISP1                                | CLUL1                                   | CRP       |
| E2F6                                                              | FBXO41                         | SEC23IP                                    | CALR3                              | HSP41             | FBN3      | SGD0        | CBD118      | C9orf96                                     | dog                                                | DLG1                                 | CNBD1                                   | CRPP1     |
| EFCC1                                                             | FCN3                           | SEC24D                                     | CAMK1G                             | HTR4              | FBXL22    | SKP1        | CBD121      | C9orf96                                     | dog                                                | DLGAP4                               | CNGB3                                   | CTDSPL    |
| EHBP1                                                             | FRMD5                          | SF3B1                                      | CAPN3                              | IFT80             | FBXO28    | SLC22A15    | CBD122      | C9orf96                                     | dog                                                | DMRTA2                               | CNTN1                                   | CTNNA3    |
| ELAVL4                                                            | FXYD4                          | SLC12A5                                    | CAPN5                              | IKZF1             | FER       | SLC43A1     | CBX2        | C9orf96                                     | cat                                                | DNAI2                                | COBLL1                                  | CTSF      |
| ELN                                                               | GALNT11                        | SLFN1L                                     | CAPS                               | IMMP2L            | FGA       | SMG6        | CCDC38      | C9orf96                                     | cat                                                | DNASE1L3                             | COL11A2P1                               | CTSK      |
| ELP6                                                              | GALNTL5                        | SLITRK3                                    | CASC4                              | JRKL              | FN3K      | SPATA19     | CCDC64B     | C9orf96                                     | cat                                                | DOCK3                                | COL5A2                                  | CUX2      |
| ENTHD1                                                            | GANC                           | SNAI2                                      | CASP16P                            | KDM3A             | FRMD7     | STAB1       | CCDC67      | C9orf96                                     | dog                                                | DOK5                                 | COL8A1                                  | CYB561D2  |
| EPST11                                                            | GATA6                          | SNRPD1                                     | CATSPER2                           | LHFPL3            | GCNT7     | STXBP6      | CCDC70      | C9orf96                                     | cat                                                | DPY5                                 | CPD                                     | CYB5P4    |
| ERBB4                                                             | GDPD1                          | SPTBN2                                     | CBL                                | LINC01927         | GEMIN7    | SUSD3       | CCDC82      | C9orf96                                     | dog                                                | DUSP11                               | CPEB4                                   | DAOA      |
| ESCO1                                                             | GLT8D1                         | STAC                                       | CBLL1                              | LINGO2            | GTG6      | TCTN1       | CENJ        | C9orf96                                     | dog                                                | DVL1                                 | CPNE3                                   | DCTPP1    |
| EXOC6B                                                            | GLYCTK                         | TAF5                                       | CBLN4                              | LRIG3             | GOLGA1    | THYN1       | CCNT2       | C9orf96                                     | dog                                                | EEF1A1P14                            | CPNE8                                   | DDN       |
| EXTL1                                                             | GNAI2                          | TAF5                                       | CCDC153                            | LRRN3             | GPATCH8   | TRAPPC8     | CD27        | C9orf96                                     | cat                                                | EHBP1L1                              | GR1                                     | DDR2      |
| FAAH                                                              | GNAT1                          | TDRD3                                      | CCDC188                            | LYST              | GPR133    | TRIO        | CD48        | C9orf96                                     | cat                                                | EMCN                                 | GR2                                     | DDX398BP2 |
| FAF2                                                              | GNL3                           | TK2                                        | CCDC192                            | MAOA              | GPR15     | UBE2B       | CD93        | C9orf96                                     | cat                                                | ENOX1                                | CRISP3                                  | DDX55     |
| FAM117A                                                           | GOLGA4                         | UBE2V2                                     | CCDC53                             | MAOB              | GPR174    | URB2        | CDH1        | C9orf96                                     | cattle                                             | EPB41L4A                             | CSMD1                                   | DENND6A   |
| FAM177B                                                           | GPAT2                          | UQCRRH                                     | CCNDBP1                            | MAP3K1            | GPRASP2   | VDAC1       | CDH6        | C9orf96                                     | cat                                                | ESRG                                 | CSMD3                                   | DHFRP2    |
| FAM19A3                                                           | GPATCH3                        | UQCRRH                                     | CCNDBP1                            | MAP7D3            | GPRCSA    | VPS26B      | CDK5RAP1    | C9orf96                                     | horse                                              | EXOC4                                | CTNNAL1                                 | DLG2      |
| FAM49B                                                            | GNP2                           | WHSC1L1                                    | CCNJL                              | MARCH7            | GPRIN2    | VRK1        | CDKL3       | C9orf96                                     | horse                                              | FAF1                                 | CYSTM1                                  | DMXL2     |
| FAU                                                               | GPR22                          | ZNF638                                     | CCNO                               | MARK2             | GRLH3     | WASF3       | CDRT1       | C9orf96                                     | dog                                                | FAM117B                              | DACH1                                   | DNAH9     |
| FBXL19                                                            | GPR3                           | ZNF852                                     | CC77                               | MARK3             | GRIA1     | WNK2        | CDRT4       | C9orf96                                     | dog                                                | FAM150B                              | DAG1                                    | PPP3      |
| FBXW7                                                             | GPR39                          | CD164L2                                    | MBD2                               | GRIA2             | GRIA2     | ZC3H3       | CELA1       | C9orf96                                     | cat                                                | FAM162B                              | DCAF10                                  | DRAP1     |
| FDXACB1                                                           | GPR62                          | CDAN1                                      | MBP                                | HADH              | HEATR5B   | CENPE       | CENPE       | C9orf96                                     | cat                                                | FAM83G                               | DCHS2                                   | DSG4      |
| FERMT2                                                            | GPX8                           | CDC20B                                     | MCF2                               | HEATR5B           | HEATR5B   | CENPM       | CENPM       | C9orf96                                     | cat                                                | FAM89B                               | DDAH1                                   | DUSP11    |
| FGF12                                                             | GRAP2                          | CCD27                                      | MCHR2                              | HECA              | HECA      | CEP68       | CEP68       | C9orf96                                     | cat                                                | FAM98B                               | DDX31                                   | DYNC2H1   |
| FGF14                                                             | GREB1L                         | CDC42EP3                                   | MED23                              | HEPACAM2          | HEPACAM2  | CEP97       | CEP97       | C9orf96                                     | cat                                                | FBN2                                 | DDX39BP1                                | EAF1      |
| FHL3                                                              | GRM2                           | CDH10                                      | METAP2                             | HEPH              | HEPH      | CETN3       | CETN3       | C9orf96                                     | dog                                                | FBXW2                                | DDX39BP2                                | EDNRA     |
| FHOD3                                                             | GTDC1                          | CEBPD                                      | METTL22                            | HMMR              | HMMR      | CHMP4B      | CHMP4B      | C9orf96                                     | cat                                                | FBXW7                                | DDX42                                   | EFCAB4B   |
| FIBCD1                                                            | GYPB                           | CELF4                                      | MGAM                               | HPS5              | HPS5      | CIB4        | CIB4        | C9orf96                                     | cat                                                | FCF1P6                               | DEFA1B                                  | EFTUD1P2  |
| FKSG51                                                            | GYPB                           | CEP41                                      | MIER3                              | HSD3B7            | HSD3B7    | CKB         | CKB         | C9orf96                                     | dog                                                | FCGBP                                | DENND5A                                 | EGFLAM    |
| FLJ45513                                                          | GZMA                           | CEP57L1                                    | MIF4GD                             | HSPA13            | HSPA13    | CLCA3       | CLCA3       | C9orf96                                     | cattle                                             | FER1L5                               | DENND6B                                 | EIF2B1    |
| FNBP1L                                                            | GZMK                           | IFT81                                      | MINOS1                             | IGFBP2            | IGFBP2    | CLDN17      | CLDN17      | C9orf96                                     | cat                                                | FGFR3                                | DFNB59                                  | EIF4BP8   |
| FOXO1                                                             | HAUS2                          | CHODL                                      | MKKS                               | IGHMBP2           | IGHMBP2   | CLEC5A      | CLEC5A      | C9orf96                                     | dog, cat                                           | FGFR3P1                              | DHFRP2                                  | EME1      |
| FRMD8                                                             | HBP1                           | CHRM4                                      | MMP16                              | INHBC             | INHBC     | CLK3        | CLK3        | C9orf96                                     | cat                                                | GABRB1                               | DIP2B                                   | EML5      |
| FSTL5                                                             | HEMK1                          | CISH                                       | MOB4                               | INPP4B            | INPP4B    | CNGA2       | CNGA2       | C9orf96                                     | cat                                                | GALNT14                              | DLEU2                                   | EVPL      |
| FUBP1                                                             | HHP1                           | CKLF                                       | MPV17L                             | INPP5A            | INPP5A    | CNTN6       | CNTN6       | C9orf96                                     | horse                                              | GALNTL6                              | DLG2                                    | EYS       |
| FUT5                                                              | HMGNT2                         | CKMT1A                                     | MT1F                               | IP04              | IP04      | COA5        | COA5        | C9orf96                                     | dog                                                | GAPDHP23                             | DNAH12                                  | FAM46A    |
| FZD3                                                              | HNRNP2                         | CKMT1B                                     | MT1L                               | IQCB1             | IQCB1     | COBL        | COBL        | C9orf96                                     | cattle                                             | GAPDHP70                             | DNAJB14                                 | FASTK03   |
| GABRB3                                                            | HS6ST3                         | CLASP2                                     | MT2A                               | ISG15             | ISG15     | COG6        | COG6        | C9orf96                                     | dog                                                | GFOD2                                | DNAJB9                                  | FBN2      |
| GALNT10                                                           | HSF5                           | CLDN10                                     | MYOF                               | ITGA2B            | ITGA2B    | COIL        | COIL        | C9orf96                                     | horse                                              | GFR2                                 | DNAJC13                                 | FBXL17    |
| GALNT2                                                            | HYAL1                          | CLSTN1                                     | NCOA6                              | ITGA9             | ITGA9     | COL11A1     | COL11A1     | C9orf96                                     | dog                                                | GINS3                                | DOC2B                                   | FER       |
| GBP2                                                              | HYAL2                          | CMTM1                                      | NIPA2                              | ITGBL1            | ITGBL1    | COL22A1     | COL22A1     | C9orf96                                     | horse                                              | GLTPD1                               | DOK6                                    | FER1L6    |
| GBP4                                                              | HYAL3                          | CNGA3                                      | NKAIN2                             | ITPR3             | ITPR3     | COL6A3      | COL6A3      | C9orf96                                     | cat                                                | GLYATL1                              | DYNLRB2                                 | FGFR3P1   |
| GBP5                                                              | IFRD2                          | CNTNAP4                                    | NOCT                               | JMJD1C            | JMJD1C    | COL9A3      | COL9A3      | C9orf96                                     | cat                                                | GLYATL1P2                            | EEFSEC                                  | FHIT      |
| GBP7                                                              | IGF1                           | COA5                                       | NOL4                               | KIAA0226          | KIAA0226  | COMMD1      | COMMD1      | C9orf96                                     | horse                                              | GLYATL2                              | EFCAB5                                  | FKBP2     |
| GCNT2                                                             | IL31RA                         | COG5                                       | NRF1                               | KIF1C             | KIF1C     | COQ10B      | COQ10B      | C9orf96                                     | dog                                                | GM2A                                 | EHBP1                                   | FNDC3B    |
| GDAP1                                                             | IL6ST                          | COL11A1                                    | NRG2                               | KIF22             | KIF22     | CPEB3       | CPEB3       | C9orf96                                     | dog                                                | GNAQ                                 | EIF4A3                                  | FOSL1     |
| GDF6                                                              | INPP4A                         | COQ10B                                     | NTAN1                              | KIF27             | KIF27     | CROCC       | CROCC       | C9orf96                                     | cat                                                | GNP3                                 | ELAC2                                   | FSTL4     |
| GGT7                                                              | IQCF1                          | CORO2B                                     | NUP54                              | KIRREL2           | KIRREL2   | CRTC3       | CRTC3       | C9orf96                                     | horse                                              | GPRC6A                               | EMID1                                   | FRTL6     |
| GINM1                                                             | IQCF2                          | CR2                                        | NXPE3                              | KRIT1             | KRIT1     | CRYM        | CRYM        | C9orf96                                     | dog                                                | GPX1                                 | EMR3                                    | GAL3ST3   |
| GK2                                                               | IQCF3                          | CSGALNACT2                                 | OMA1                               | KYNU              | KYNU      | C-SKI       | C-SKI       | C9orf96                                     | horse                                              | GRAP                                 | EPB41                                   | GALC      |
| GLI3                                                              | IQCF5                          | CSMD2                                      | OR9A4                              | LAMC2             | LAMC2     | CSP11       | CSP11       | C9orf96                                     | cat                                                | GRIK1                                | EPHA3                                   | GALNT13   |
| GLYCTK                                                            | IQCF6                          | CSPG5                                      | PARP12                             | LAP3              | LAP3      | CTTN        | CTTN        | C9orf96                                     | cat                                                | GRIN3A                               | ERCC5                                   | GALNT14   |
| GP9                                                               | ITGA9                          | CTDSPL2                                    | PDE4D                              | LATS2             | LATS2     | CUL1        | CUL1        | C9orf96                                     | cattle                                             | GSTP1                                | ERG                                     | GAPDHP36  |

| AMH POOL                                                    |                             |                                         |                                 | DOMESTICATES POOL |           |             |             |                                          | GREAT APE POOL (Cagan et al. 2016)      |                                   |                                     |            |
|-------------------------------------------------------------|-----------------------------|-----------------------------------------|---------------------------------|-------------------|-----------|-------------|-------------|------------------------------------------|-----------------------------------------|-----------------------------------|-------------------------------------|------------|
| Peyrégne et al. 2016 (SF1, SF2, Table 2 and Table S7) [375] | Racimo 2016 (Table 3) [326] | Prüfer et al. 2014 (Table S19b.1) [108] | TOTAL AMH (no duplicates) [742] | DOG [229]         | CAT [291] | CATTLE [78] | HORSE [109] | TOTAL DOMESTICATES (no duplicates) [691] | Chimp ( <i>P.t. troglodytes</i> ) [415] | Orango ( <i>P. abelii</i> ) [500] | (Gorilla) <i>G.g. gorilla</i> [426] |            |
| GPM6A                                                       | ITIH1                       |                                         | CTNNB1                          | PDE7B             | LCAT      |             |             | CUX2                                     | dog                                     | HADH                              | EWSR1                               | GAS2L3     |
| GPR22                                                       | ITIH3                       |                                         | CTNND2                          | PDILT             | LIAS      |             |             | CXCL10                                   | dog                                     | HCG23                             | EXOC4                               | GBP1       |
| GPT2                                                        | ITIH4                       |                                         | CTPS                            | PDXDC1            | LIMD1     |             |             | CYB5R1                                   | cat                                     | HCG4                              | EXOSC3                              | GN513      |
| GRIA1                                                       | KCNIP3                      |                                         | CTXN3                           | PKD1L1            | LRRC32    |             |             | CYP1F1                                   | dog                                     | HCG4P11                           | EYS                                 | GOLPH3L    |
| GRIK3                                                       | KCNJ3                       |                                         | CXCL13                          | PLCE1             | LRRC36    |             |             | CYP1A1                                   | cat                                     | CYP1A2                            | FAM172A                             | GPD1       |
| GRIK5                                                       | KIAA0825                    |                                         | CXCL3                           | PLEKHM3           | LSM3      |             |             | CYP1A2                                   | cat                                     | HDAC9                             | FAM190A                             | GPR137     |
| GRM3                                                        | KIAA1841                    |                                         | CYB561                          | POLI              | MAP7D2    |             |             | CYP26A1                                  | dog                                     | HEATR1                            | FAM5C                               | GRIA4      |
| GTF3C5                                                      | KLF2                        |                                         | CYB561D2                        | POLR1E            | MARVELD3  |             |             | CYP26C1                                  | dog                                     | HEATR4                            | FAM71A                              | GRID2      |
| HEG1                                                        | KMT2C                       |                                         | DAPP1                           | Q2ABD2            | MERTK     |             |             | CYP27B1                                  | cat                                     | HEMK1                             | FAN1                                | GRIK2      |
| HERC5                                                       | LCMT2                       |                                         | DBIL5P2                         | RAB3GAP1          | METTL8    |             |             | DACT1                                    | cat                                     | HIST1H2BK                         | FASTKD1                             | GSK3B      |
| HHIP                                                        | LGALS1                      |                                         | DDHD2                           | RABGAP1L          | MFAP3     |             |             | DAPK1                                    | cat                                     | HIVEP3                            | FBLN2                               | GSPT1      |
| HIVEP2                                                      | LIN28A                      |                                         | DDX4                            | RALY              | MIIP      |             |             | DBI                                      | cattle                                  | HLA-B                             | FBXW4P1                             | GTF2H3     |
| HMG3P1                                                      | LRRCS7                      |                                         | DGCR8                           | RANBP17           | MORC1     |             |             | DCC                                      | cat, horse                              | HLA-C                             | FCHO2                               | GTF2IP3    |
| HRASL2                                                      | LRRFIP2                     |                                         | DGKZ                            | RAPH1             | MRPL11    |             |             | DCST1                                    | cattle                                  | HLA-DPA1                          | FCRL1                               | HARS2      |
| HS6ST3                                                      | LSMEM2                      |                                         | DGUOK                           | REEP1             | MRPL52    |             |             | DDC                                      | dog                                     | HLA-DPA2                          | FGD5P1                              | HBE1       |
| HSD3B7                                                      | MAL                         |                                         | DHDDS                           | RELT              | MTIF2     |             |             | DEFB119                                  | dog                                     | HLA-DPB1                          | FGF7P1                              | HCG4P3     |
| HSDL2                                                       | MANF                        |                                         | DHRS12                          | RFTN2             | MTRF1     |             |             | DEFB122                                  | dog                                     | HLA-DPB2                          | FGFR3P1                             | HCG4P5     |
| HTR1E                                                       | MAP1A                       |                                         | DHX29                           | RG9MTD3           | MURC      |             |             | DLGAP1                                   | horse                                   | HLA-DOA1                          | FKBP6                               | HCG9       |
| IGFL2                                                       | MAP3K6                      |                                         | DLGAP1                          | RNF103            | MVK       |             |             | DNAH3                                    | dog                                     | HLA-DOB1                          | FKBP7                               | HCP5       |
| IGFL3                                                       | MAPKAPK3                    |                                         | DNAH1                           | RNPC3             | MYLK3     |             |             | DNAH9                                    | horse                                   | HLA-DRB1                          | FLJ39534                            | HDGFRP3    |
| IGFL4                                                       | MCHR1                       |                                         | DNAJA2                          | RPL3              | MYO15A    |             |             | DNAJA1                                   | dog                                     | HLA-E                             | FNBP4                               | HECW1      |
| IL7                                                         | MCIDAS                      |                                         | DNAJB4                          | RPL31             | MYO9A     |             |             | DNAJB9                                   | cat                                     | HLA-F                             | FTO                                 | HECW1-IT1  |
| INPP5F                                                      | MCTP1                       |                                         | DNAJC3                          | RRN3              | NAPRT1    |             |             | DNTTIP2                                  | cat                                     | HLA-V                             | FTSJ3                               | HERC5      |
| JMJD6                                                       | MDH1                        |                                         | DOCK3                           | RRN3P1            | NEK1      |             |             | DOCK2                                    | dog                                     | HMCN1                             | FYB                                 | HLA-A      |
| KAT7                                                        | MED26                       |                                         | DPYSL5                          | RRNRP2            | NEK4      |             |             | DPEK3                                    | cat                                     | HMGAI1P3                          | GAA                                 | HLA-C      |
| KATNA1                                                      | MFAP1                       |                                         | DRAM1                           | SAE1              | NFAM1     |             |             | DSCAM                                    | cattle                                  | HNRNPA1P60                        | GABRR1                              | HLA-DPA1   |
| KCNA4                                                       | MGAT4A                      |                                         | DTNA                            | SCARB2            | NFKBIZ    |             |             | DTD1                                     | dog                                     | HSD3BP1                           | GABRP                               | HLA-DPB1   |
| KCND2                                                       | MIB1                        |                                         | DUS4L                           | SCP2D1            | NOLC1     |             |             | DUSP19                                   | cat                                     | HSD3BP2                           | GAS2L1                              | HLA-DOA1   |
| KCNH7                                                       | MKL1                        |                                         | DUSP11                          | SDAD1             | NOSTRIN   |             |             | ECHD1                                    | cat                                     | HSFY1P1                           | GBE1                                | HLA-DOA2   |
| KCNJ3                                                       | MLH1                        |                                         | DUSP7                           | SEMA3D            | NOTCH2    |             |             | EDC3                                     | cat                                     | HVCN1                             | GCSAML                              | HLA-DOB1   |
| KIAA1143                                                    | MRPS5                       |                                         | DYNC1H1                         | SETBP1            | NPFFR2    |             |             | EEA1                                     | horse                                   | ICA1L                             | GDPD4                               | HLA-DOB2   |
| KIAA1958                                                    | MTMR4                       |                                         | DYSF                            | SETD9             | NRG2      |             |             | EHBP1L1                                  | cat                                     | IFITM4P                           | GHR                                 | HLA-DOB3   |
| KIF15                                                       | MTRNR2L7                    |                                         | DZIP1                           | SF3B1             | NUDT15    |             |             | EIF2S2                                   | dog                                     | IGKV1D-17                         | GIMAP7                              | HLA-DRA    |
| KIF18A                                                      | MUSTN1                      |                                         | EZF6                            | SH3GL2            | OPTC      |             |             | ELF2                                     | dog                                     | IGKV6D-41                         | GLYATL2                             | HLA-DR1    |
| KIFAP3                                                      | NAT6                        |                                         | EFCC1                           | SKA2              | OR10K1    |             |             | EMC2                                     | cattle                                  | IGLVIV-64                         | GPR113                              | HLA-DRB9   |
| KLHL18                                                      | NAT8                        |                                         | EGR4                            | SLC5A1            | OR2B11    |             |             | ENKUR                                    | cat                                     | IGLVIV-65                         | GPSM2                               | HLA-J      |
| LARGE1                                                      | NEDD1                       |                                         | EHBP1                           | SLC5A4            | OR4D6     |             |             | ENSCAFG0000001898                        | dog                                     | IGLVIV-66-1                       | GTF2E1                              | HLA-S      |
| LDHD                                                        | NEK4                        |                                         | EIF3J                           | SLC6A17           | OTOF      |             |             | ENSCAFG0000002328                        | dog                                     | IGLVV-66                          | GTF3C4                              | HLA-W      |
| LEMD3                                                       | NISCH                       |                                         | ELAVL4                          | SLC9A6            | PAFAH2    |             |             | ENTPD1                                   | dog                                     | IL26                              | H2AFZ                               | HMCN2      |
| LIMK1                                                       | NOTO                        |                                         | ELL3                            | PARV6             | ENTPD7    |             |             | ENTPD7                                   | cat                                     | INPP4B                            | HCG23                               | HNRNPH1    |
| LOH11CR11                                                   | NPRL2                       |                                         | ELN                             | SMIM23            | PCDHA1    |             |             | EPHB4                                    | cat                                     | IP6K1                             | HCG4B                               | HORMAD1    |
| LPHN3                                                       | NR0B2                       |                                         | ELP6                            | SMO               | PCDHB4    |             |             | EPS15                                    | dog                                     | KCNH7                             | HCG4P3                              | HSBP1P2    |
| LRIG2                                                       | NR2F1                       |                                         | ENTHD1                          | SMYD2             | PHLDB3    |             |             | ERBB4                                    | cattle                                  | KCNIP4                            | HCG4P7                              | HSD17B7    |
| LRP1B                                                       | NT5DC2                      |                                         | EPB42                           | SNAP29            | PITRM1    |             |             | ETNPP1                                   | dog                                     | KCNK7                             | HCG4P8                              | HYAL1      |
| LYST                                                        | NUDC                        |                                         | EPM2AIP1                        | SRP72             | PJA2      |             |             | ETV4                                     | cat                                     | KCTD7                             | HCG9                                | HYAL2      |
| MAGI2                                                       | NUP37                       |                                         | EPS15L1                         | STARD6            | PLA2G2E   |             |             | EYA1                                     | cattle                                  | KHDRBS2                           | HCP5                                | HYAL3      |
| MAL                                                         | NWD1                        |                                         | EPST11                          | STK10             | PLA2G3    |             |             | F9                                       | dog                                     | KIAA0146                          | HDGFRP3                             | IGF2R      |
| MAP2                                                        | OTUD4                       |                                         | ERBB4                           | STX7              | PLAC1     |             |             | FABP5                                    | dog                                     | KIAA1217                          | HES4                                | IGLV2-33   |
| MATR3                                                       | OTX1                        |                                         | ESCO1                           | TAS2R38           | PLAC8L1   |             |             | FAF1                                     | horse                                   | KIF19                             | HLA2                                | IGLV3-31   |
| MCM4                                                        | PARP3                       |                                         | ESM1                            | TBC1D9            | PLEKHH1   |             |             | FAM13                                    | cat                                     | KLHDC8B                           | HLA-DPA1                            | IGLV3-32   |
| MCMBP                                                       | PARPBP                      |                                         | EXOC6B                          | TBXAS1            | PLIN3     |             |             | FAM107B                                  | dog                                     | KLHL7                             | HLA-DPA2                            | IL36B      |
| MDM1                                                        | PATL2                       |                                         | EXTL1                           | TCTN3             | PML       |             |             | FAM114A2                                 | cat                                     | KLHL8                             | HLA-DPA3                            | IMMP2L     |
| METTL15                                                     | PBRM1                       |                                         | FAAH                            | TEKT3             | PPAP2A    |             |             | FAM131B                                  | cat                                     | KRT8P26                           | HLA-DPB1                            | IMMTP1     |
| METTL23                                                     | PCBP4                       |                                         | FAF2                            | TH                | PPAPDC1B  |             |             | FAM172A                                  | dog, cattle                             | KRTAP5-10                         | HLA-DPB2                            | INTU       |
| MFRP                                                        | PCNX                        |                                         | FAHD2A                          | THEGL             | PPFIBP1   |             |             | FAM179A                                  | cat                                     | KRTAP5-9                          | HLA-DOA1                            | IQCF6      |
| MFS11                                                       | PDE4B                       |                                         | FAM117A                         | TLX3              | PPP1R13B  |             |             | FAM40B                                   | dog                                     | LCA1                              | HLA-DOB1                            | IQGAP2     |
| MIB1                                                        | PDI3A                       |                                         | FAM150A                         | TMEM114           | PRICKLE4  |             |             | FAM69A                                   | cat                                     | LDB2                              | HLA-DRA                             | IQBUB      |
| MIGA1                                                       | PEL1                        |                                         | FAM172A                         | TMEM132D          | PRKAG1    |             |             | FANCA                                    | horse                                   | LETM1                             | HLA-DRB1                            | ITGAL      |
| MM9P                                                        | PEX13                       |                                         | FAM177B                         | TMEM159           | PRKG2     |             |             | FANCB                                    | cat                                     | LGALS8                            | HLA-DRB9                            | KCNH8      |
| MPND                                                        | PHF7                        |                                         | FAM19A3                         | TMEM242           | PRR11     |             |             | FAT4                                     | cat                                     | LGR4                              | HLA-G                               | KDM2A      |
| MRPL49                                                      | PIGV                        |                                         | FAM46B                          | TNKS2             | PRX       |             |             | FBN3                                     | cat                                     | LHFFL3                            | HLA-H                               | KDM4C      |
| MRPS5                                                       | PIK3CG                      |                                         | FAM49B                          | TRBV25OR9-2       | PSPH      |             |             | FBXL22                                   | cat                                     | LIMCH1                            | HLA-J                               | KIAA1644   |
| MYH3                                                        | PLA2G4D                     |                                         | FAM83F                          | TRIM16            | PSTK      |             |             | FBXO10                                   | dog                                     | LL22NC03-23C6.15                  | HLA-K                               | KLC2       |
| MYHAS                                                       | PLA2G4E                     |                                         | FAU                             | TRIM59            | PTPRR     |             |             | FBXO28                                   | cat                                     | LNPEP                             | HLA-S                               | KMT2D      |
| MYL4                                                        | PLA2GDF                     |                                         | FBXL19                          | TRMT61A           | PTPRS     |             |             | FBXO31                                   | horse                                   | LOC124685                         | HLA-T                               | KPRP       |
| MYLK3                                                       | PMCH                        |                                         | FBXO41                          | TRY1              | PUSL1     |             |             | FBXW10                                   | dog                                     | LOC644100                         | HLA-U                               | KRTAP12-1  |
| NADK2                                                       | POC1A                       |                                         | FBXW7                           | TRY2              | RABL3     |             |             | FBXW11                                   | dog                                     | LPHN3                             | HLA-W                               | KRTAP12-2  |
| NAV3                                                        | POTEC                       |                                         | FCN3                            | TRY3              | RBM11     |             |             | FCHSD2                                   | horse                                   | LRBA                              | HMG20A                              | KRTAP22-1  |
| NCOA6                                                       | POU5F2                      |                                         | FDXACB1                         | TTC39A            | RBP5      |             |             | FCRL4                                    | cattle                                  | LRP5                              | HNRNPA2B1                           | KRTAP22-2  |
| NDUFA11                                                     | PPAP2A                      |                                         | FERMT2                          | TUBGCP5           | RCS1      |             |             | FER                                      | cat                                     | LRWD1                             | HSFY1P1                             | KRTAP6-2   |
| NEAT1                                                       | PPIP5K1                     |                                         | FGF12                           | TVP23B            | RELL1     |             |             | FGA                                      | cat                                     | LTBP3                             | HTATSF1P2                           | KRTAP6-3   |
| NEB                                                         | PPM1E                       |                                         | FGF14                           | TVP23C            | RHBDD1    |             |             | FGD6                                     | dog                                     | MACROD2                           | HTN1                                | KRTAP9-1   |
| NEXN                                                        | PPM1M                       |                                         | FHL3                            | U2                | RIMKLA    |             |             | FGF13                                    | dog                                     | MANF                              | HTN3                                | KRTAP9-12P |
| NMUR2                                                       | PRADC1                      |                                         | FHOD3                           | UMOD              | RNASE6    |             |             | FGF18                                    | dog                                     | MAP3K11                           | HTR3E                               | LCE1E      |
| NTM                                                         | PRKAR2B                     |                                         | FIBCD1                          | V1R               | RNPC3     |             |             | FGFBP3                                   | dog                                     | MCC                               | IFFO2                               | LCE1F      |
| NTRK2                                                       | PRKCD                       |                                         | FKSG51                          | VEZT              | RSL1D1    |             |             | FHL1                                     | dog                                     | MCL1                              | IF16                                | LCE4A      |



| AMH POOL                                                          |                                |                                            |                                    | DOMESTICATES POOL |           |             |             |                                             | GREAT APE POOL (Cagan et al. 2016)                |                                      |                                        |           |
|-------------------------------------------------------------------|--------------------------------|--------------------------------------------|------------------------------------|-------------------|-----------|-------------|-------------|---------------------------------------------|---------------------------------------------------|--------------------------------------|----------------------------------------|-----------|
| Peyrégne et al. 2016<br>(SF1, SF2, Table 2<br>and Table S7) [375] | Racimo 2016 (Table<br>3) [326] | Prüfer et al. 2014<br>(Table S19b.1) [108] | TOTAL AMH (no<br>duplicates) [742] | DOG [229]         | CAT [291] | CATTLE [78] | HORSE [109] | TOTAL DOMESTICATES (no duplicates)<br>[691] | Chimp ( <i>P.t.</i><br><i>troglodytes</i> ) [415] | Orango ( <i>P. abelii</i> )<br>[500] | (Gorilla) <i>G.g. gorilla</i><br>[426] |           |
| SMAD9                                                             | TRIM43                         |                                            | HSDL2                              |                   |           |             |             | KIAA1549                                    | horse                                             | PTCHD3P1                             | NMNAT1P5                               | PCDH15    |
| SNHG4                                                             | TRIM69                         |                                            | HSF5                               |                   |           |             |             | KIF1C                                       | cat                                               | PTENP1                               | NMUR2                                  | PCDH20    |
| SNRPD1                                                            | TRNF1                          |                                            | HSPD1                              |                   |           |             |             | KIF22                                       | cat                                               | PTPRQ                                | NNT                                    | PDZD9     |
| SORCS1                                                            | TTBK2                          |                                            | HSPE1                              |                   |           |             |             | KIF27                                       | cat                                               | PYHIN1                               | NONOP2                                 | PELI3     |
| SORCS2                                                            | TUBGCP4                        |                                            | HTR1E                              |                   |           |             |             | KIF6-like                                   | cattle                                            | R3HCC1L                              | NOP58                                  | PGAP1     |
| SORCS3                                                            | TUSC2                          |                                            | HYAL1                              |                   |           |             |             | KIRREL2                                     | cat                                               | RAB42                                | NOS1                                   | PHGDH     |
| SPIDR                                                             | TWF2                           |                                            | HYAL2                              |                   |           |             |             | KIT                                         | cattle                                            | RAB43                                | NQO2                                   | PKD1      |
| SPOP                                                              | TYW5                           |                                            | HYAL3                              |                   |           |             |             | KLHDC4                                      | horse                                             | RABGAP1L                             | NR2F1                                  | PLA2G5    |
| SRSF2                                                             | UBR1                           |                                            | IFRD2                              |                   |           |             |             | KRIT1                                       | cat                                               | RABGEF1                              | NRG3                                   | PLCB1     |
| ST7                                                               | UGGT2                          |                                            | IGF1                               |                   |           |             |             | KYNU                                        | cat                                               | RAD54L2                              | NRXN1                                  | PLCB3     |
| STAC                                                              | UGP2                           |                                            | IGFL2                              |                   |           |             |             | LAMC2                                       | cat                                               | RANBP10                              | NRXN3                                  | PLEKHM1   |
| STAG1                                                             | UNC50                          |                                            | IGFL3                              |                   |           |             |             | LAMC3                                       | cattle                                            | RANP1                                | NTF3                                   | POC1A     |
| STMN2                                                             | USP34                          |                                            | IGFL4                              |                   |           |             |             | LAP3                                        | cat                                               | RASA3                                | NUP153                                 | POLQ      |
| STX1A                                                             | VPS39                          |                                            | IL31RA                             |                   |           |             |             | LATS2                                       | cat                                               | RASA4B                               | OBP2B                                  | POLR2J    |
| STX1B                                                             | VPS54                          |                                            | IL6ST                              |                   |           |             |             | LCAT                                        | cat                                               | RBFOX1                               | OBSCN                                  | PPM1L     |
| SYNPO2                                                            | WASF2                          |                                            | IL7                                |                   |           |             |             | LCLAT1                                      | horse                                             | RBM15B                               | OR10H1                                 | PPP1R14B  |
| SYT1                                                              | WDPCP                          |                                            | INA                                |                   |           |             |             | LEPREL1                                     | horse                                             | RELA                                 | OR10H5                                 | PRKAG1    |
| SYT6                                                              | WDR76                          |                                            | INPP4A                             |                   |           |             |             | LHFPL3                                      | dog                                               | RHCE                                 | OR10V1                                 | PRKG1     |
| SYVN1                                                             | WDR82                          |                                            | INPP5F                             |                   |           |             |             | LIAS                                        | cat                                               | RHD                                  | OR11G2                                 | PTCD1     |
| TAC4                                                              | WDTC1                          |                                            | IQCF1                              |                   |           |             |             | LILRA6                                      | cattle                                            | RHOA                                 | OR11H5P                                | PTPRO     |
| TAS2R16                                                           | XPO1                           |                                            | IQCF2                              |                   |           |             |             | LIMD1                                       | cat                                               | RNGTT                                | OR11H6                                 | PWP1      |
| TBC1D23                                                           | ZDHC18                         |                                            | IQCF3                              |                   |           |             |             | LIN28B                                      | cattle                                            | RPL23AP1                             | OR11H7                                 | RAB1B     |
| TBX1                                                              | ZEB2                           |                                            | IQCF5                              |                   |           |             |             | LINC01927                                   | dog                                               | RPL32P1                              | OR1B1                                  | RAB27A    |
| TDRD3                                                             | ZMYND10                        |                                            | IQCF6                              |                   |           |             |             | LINGO2                                      | dog                                               | RPL3P2                               | OR1H1P                                 | RASA4B    |
| TDRD7                                                             | ZNF106                         |                                            | ITFG1                              |                   |           |             |             | LMF1                                        | horse                                             | RPL5P18                              | OR1Q1                                  | RBM14     |
| TFAP2D                                                            | ZNF2                           |                                            | ITGA9                              |                   |           |             |             | LRIG3                                       | dog                                               | RPL7AP7                              | OR2G2                                  | RBM4      |
| TGM4                                                              | ZNF248                         |                                            | ITIH1                              |                   |           |             |             | LRP1B                                       | cattle                                            | RPLP1P11                             | OR4K1                                  | RBM4B     |
| THSD7B                                                            | ZNF25                          |                                            | ITIH3                              |                   |           |             |             | LRRC32                                      | cat                                               | RPS4XP6                              | OR4K15                                 | RERGL     |
| THTPA                                                             | ZNF33A                         |                                            | ITIH4                              |                   |           |             |             | LRRC36                                      | cat                                               | SCARNA20                             | OR4K16P                                | RHCE      |
| TLE3                                                              | ZNF33B                         |                                            | JMJD6                              |                   |           |             |             | LRRN3                                       | dog                                               | SCEL                                 | OR4K5                                  | RHD       |
| TLR9                                                              | ZNF37A                         |                                            | KAT7                               |                   |           |             |             | LSM3                                        | cat                                               | SCRN1                                | OR5AK3P                                | RHEBL1    |
| TM7SF2                                                            | ZNF514                         |                                            | KATNA1                             |                   |           |             |             | LTF                                         | cattle                                            | SCYL1                                | OR5AN2P                                | RIPK2     |
| TMEM123                                                           | ZSCAN29                        |                                            | KCNA4                              |                   |           |             |             | LYST                                        | dog                                               | SDHAP3                               | OR6Q1                                  | ROR2      |
| TMEM235                                                           |                                |                                            | KCND2                              |                   |           |             |             | MAFK                                        | cattle                                            | SDHCP1                               | OR7E116P                               | RPL13     |
| TMEM262                                                           |                                |                                            | KCNH7                              |                   |           |             |             | MAGEA13P-like                               | cattle                                            | SETP22                               | OR7E31P                                | RPL32P1   |
| TMEM42                                                            |                                |                                            | KCNIP3                             |                   |           |             |             | MAOA                                        | dog                                               | SGCB                                 | OR8G1                                  | RPL37P10  |
| TMOD1                                                             |                                |                                            | KCNJ3                              |                   |           |             |             | MAOB                                        | dog                                               | SGM52                                | OR8G2P                                 | RPL3P2    |
| TNFRSF21                                                          |                                |                                            | KIAA0825                           |                   |           |             |             | MAP3K1                                      | dog                                               | SIPA1                                | OR8G7P                                 | RPRD2     |
| TNRC6B                                                            |                                |                                            | KIAA1143                           |                   |           |             |             | MAP3K4                                      | horse                                             | SLC12A4                              | OR9G2P                                 | RPUSD1    |
| TNS1                                                              |                                |                                            | KIAA1841                           |                   |           |             |             | MAP7D2                                      | horse                                             | SLC1A3                               | OR9G3P                                 | RSL1D1    |
| TP53INP2                                                          |                                |                                            | KIAA1958                           |                   |           |             |             | MAP7D3                                      | dog                                               | SLC22A3                              | OR9G4                                  | RUNDC3B   |
| TPD52                                                             |                                |                                            | KIF15                              |                   |           |             |             | MAPK10                                      | horse                                             | SLC4A7                               | OR9Q1                                  | SCN11A    |
| TRIM71                                                            |                                |                                            | KIF18A                             |                   |           |             |             | MARCH10                                     | horse                                             | SLC5A10                              | OVOL3                                  | SCN9A     |
| TRMT2A                                                            |                                |                                            | KIFAP3                             |                   |           |             |             | MARCH7                                      | dog                                               | SLC7A14                              | PAH                                    | SEC11C    |
| TTC6                                                              |                                |                                            | KLF2                               |                   |           |             |             | MARK2                                       | dog                                               | SLC9A9                               | PAK7                                   | SEC23A    |
| U6                                                                |                                |                                            | KLHL18                             |                   |           |             |             | MARK3                                       | dog                                               | SLCO4C1                              | PAM                                    | SEC24D    |
| U7                                                                |                                |                                            | KMT2C                              |                   |           |             |             | MARVELD3                                    | cat                                               | SLIT1                                | PAQR9                                  | SF3B2     |
| UBE2V2                                                            |                                |                                            | LARGE1                             |                   |           |             |             | MATN2                                       | horse                                             | SLIT3                                | PBRM1                                  | SGCB      |
| UGT8                                                              |                                |                                            | LCMT2                              |                   |           |             |             | MBD2                                        | dog                                               | SMIM14                               | PCDH15                                 | SGCD      |
| USP33                                                             |                                |                                            | LDHD                               |                   |           |             |             | MBP                                         | dog                                               | SNX29                                | PCYOX1                                 | SLC25A13  |
| USP54                                                             |                                |                                            | LEMD3                              |                   |           |             |             | MC1R                                        | cattle                                            | SOX5                                 | PEAK1                                  | SLC2A13P1 |
| UTP11                                                             |                                |                                            | LGALS1                             |                   |           |             |             | MCF2                                        | dog                                               | SP7                                  | PEBP1P3                                | SLC4A4    |
| VAPA                                                              |                                |                                            | LIMK1                              |                   |           |             |             | MCHR2                                       | dog                                               | SPEF2                                | PEX26                                  | SLC7A2    |
| VMAC                                                              |                                |                                            | LIN28A                             |                   |           |             |             | MED23                                       | dog                                               | SPOCK3                               | PHKB                                   | SLC8A1    |
| VOPP1                                                             |                                |                                            | LOH11CR11                          |                   |           |             |             | MERTK                                       | cat                                               | SPRR2B                               | PITRM1                                 | SLC01B3   |
| VPS51                                                             |                                |                                            | LPHN3                              |                   |           |             |             | METAP2                                      | dog                                               | SPRR2G                               | PLA2G5                                 | SLC01B7   |
| WBSCR22                                                           |                                |                                            | LRFN4                              |                   |           |             |             | METTL22                                     | dog                                               | SSSCA1                               | PLCE1                                  | SLFN13    |
| WDPCP                                                             |                                |                                            | LRIG2                              |                   |           |             |             | METTL8                                      | cat                                               | STAG1                                | PLEKHA3                                | SMARCC1   |
| WDR59                                                             |                                |                                            | LRP1B                              |                   |           |             |             | MFAP3                                       | cat                                               | STK33                                | PLEKHN1                                | SMARCD1   |
| WDR82                                                             |                                |                                            | LRRC41                             |                   |           |             |             | MGAM                                        | dog                                               | STXBP6                               | PLXNB2                                 | SNTG1     |
| WIZ                                                               |                                |                                            | LRRC57                             |                   |           |             |             | MGC12345                                    | cattle                                            | SUCLA2P1                             | PMS1                                   | SNX29     |
| ZBBX                                                              |                                |                                            | LRRFIP2                            |                   |           |             |             | MIER3                                       | dog                                               | SUMO1                                | PNKD                                   | SOD1P3    |
| ZBTB20                                                            |                                |                                            | LSM1                               |                   |           |             |             | MIF4GD                                      | dog                                               | SUSD2                                | PNLDC1                                 | SOGA1     |
| ZBTB34                                                            |                                |                                            | LSMEM2                             |                   |           |             |             | MIIIP                                       | cat                                               | SVIL                                 | PNPLA5                                 | SP140     |
| ZDHC8                                                             |                                |                                            | LSR7                               |                   |           |             |             | MINOS1                                      | dog                                               | SYNDIG1                              | POLI                                   | SPAM1     |
| ZFHX4                                                             |                                |                                            | LYST                               |                   |           |             |             | MITF                                        | cattle                                            | TACC1P1                              | POT1                                   | SPATS2L   |
| ZFPL1                                                             |                                |                                            | MAGI2                              |                   |           |             |             | MKKS                                        | dog                                               | TAF12                                | PPARD                                  | SPDL1     |
| ZIC4                                                              |                                |                                            | MAL                                |                   |           |             |             | MMP16                                       | dog                                               | TARSL2                               | PPP2R2B                                | SPIRE1    |
| ZNF197                                                            |                                |                                            | MANF                               |                   |           |             |             | MOB4                                        | dog                                               | TAS1R3                               | PRICKLE2                               | SPTBN2    |
| ZNF2                                                              |                                |                                            | MAP1A                              |                   |           |             |             | MORC1                                       | cat                                               | TBC1D5                               | PRKDC                                  | SRIP1     |
| ZNF205                                                            |                                |                                            | MAP2                               |                   |           |             |             | MPV17L                                      | dog                                               | TCP10                                | PKRA                                   | SRP68     |
| ZNF213                                                            |                                |                                            | MAP3K6                             |                   |           |             |             | MRPL11                                      | cat                                               | TCP10L                               | PRKRIRP6                               | SSPO      |
| ZNF35                                                             |                                |                                            | MAP7                               |                   |           |             |             | MRPL52                                      | cat                                               | TCTA                                 | PRMT8                                  | ST8SJA6   |
| ZNF407                                                            |                                |                                            | MAPKAPK3                           |                   |           |             |             | MSI2                                        | horse                                             | TDRD1                                | PROSER1                                | STK32B    |
| ZNF501                                                            |                                |                                            | MATR3                              |                   |           |             |             | MT1F                                        | dog                                               | TEKT5                                | PRR4                                   | SYCP2L    |
| ZNF502                                                            |                                |                                            | MCAM                               |                   |           |             |             | MT1L                                        | dog                                               | TFAMP2                               | PRUNE                                  | SYNE1     |

| AMH POOL                                                    |                             |                                         |                                 | DOMESTICATES POOL |           |             |             |                                                | GREAT APE POOL (Cagan et al. 2016)       |                                   |                                      |            |
|-------------------------------------------------------------|-----------------------------|-----------------------------------------|---------------------------------|-------------------|-----------|-------------|-------------|------------------------------------------------|------------------------------------------|-----------------------------------|--------------------------------------|------------|
| Peyrègne et al. 2016 (SF1, SF2, Table 2 and Table S7) [375] | Racimo 2016 (Table 3) [326] | Prüfer et al. 2014 (Table S19b.1) [108] | TOTAL AMH (no duplicates) [742] | DOG [229]         | CAT [291] | CATTLE [78] | HORSE [109] | TOTAL DOMESTICATES (no duplicates) [691]       | Chimp ( <i>P. t. troglodytes</i> ) [415] | Orango ( <i>P. abelii</i> ) [500] | (Gorilla) <i>G. g. gorilla</i> [426] |            |
| ZNF514                                                      |                             |                                         | MCHR1                           |                   |           |             |             | MT2A                                           | dog                                      | THSD7A                            | PRUNEP1                              | SYNPR      |
| ZNF521                                                      |                             |                                         | MCIDAS                          |                   |           |             |             | MTIF2                                          | cat                                      | TMC1                              | PSD3                                 | SYT12      |
| ZNF574                                                      |                             |                                         | MCM4                            |                   |           |             |             | MTRF1                                          | cat                                      | TMEM245                           | PSMC5                                | TBC1D12    |
| ZNF638                                                      |                             |                                         | MCMBP                           |                   |           |             |             | MURC                                           | cat                                      | TMEM50A                           | PTCD2                                | TBC1D24    |
| ZNHIT2                                                      |                             |                                         | MCTP1                           |                   |           |             |             | MVK                                            | cat                                      | TMPOP1                            | PTF1A                                | TBX20      |
| ZNRF1                                                       |                             |                                         | MDH1                            |                   |           |             |             | MYBPC1                                         | horse                                    | TNIK                              | PTPRC                                | TEC        |
|                                                             |                             |                                         | MDK                             |                   |           |             |             | MYLK3                                          | cat                                      | TNR                               | PWRN4                                | TERF2IP    |
|                                                             |                             |                                         | MDM1                            |                   |           |             |             | MYO15A                                         | cat                                      | TNXB                              | PYHIN1                               | THADA      |
|                                                             |                             |                                         | MED26                           |                   |           |             |             | MYO9A                                          | cat                                      | TOMM7                             | PZP                                  | THAP11     |
|                                                             |                             |                                         | MEGF10                          |                   |           |             |             | MYOF                                           | dog                                      | TRAF5                             | RABGAP1L                             | THSD4      |
|                                                             |                             |                                         | METTL15                         |                   |           |             |             | NAPRT1                                         | cat                                      | TRBV25OR9-2                       | RABGEF1                              | TMCT7      |
|                                                             |                             |                                         | METTL23                         |                   |           |             |             | NCAPD3                                         | horse                                    | TRBV26OR9-2                       | RAD23B                               | TMEM115    |
|                                                             |                             |                                         | MFAP1                           |                   |           |             |             | NCAPG                                          | cattle                                   | TRIM58                            | RAET1K                               | TMEM14B    |
|                                                             |                             |                                         | MFRP                            |                   |           |             |             | NCOA6                                          | dog                                      | TRPC7                             | RAET1L                               | TMEM151A   |
|                                                             |                             |                                         | MFSD11                          |                   |           |             |             | NDUFB1                                         | cattle                                   | TSC22D1                           | RAF1                                 | TMEM50A    |
|                                                             |                             |                                         | MGAT4A                          |                   |           |             |             | NEK1                                           | cat                                      | TSC22D4                           | RASSF6                               | TMEM87A    |
|                                                             |                             |                                         | MIB1                            |                   |           |             |             | NEK4                                           | cat                                      | TSGA10                            | RBMS3                                | TMPRSS11A  |
|                                                             |                             |                                         | MIGA1                           |                   |           |             |             | NFAM1                                          | cat                                      | TTC19                             | RCBTB2P1                             | TRAIIP     |
|                                                             |                             |                                         | MKL1                            |                   |           |             |             | NFKBIZ                                         | cat                                      | UBE2D2                            | REL                                  | TRIM42     |
|                                                             |                             |                                         | MKLN1                           |                   |           |             |             | NID2                                           | horse                                    | UGDH                              | RGS3                                 | TSC2       |
|                                                             |                             |                                         | MLH1                            |                   |           |             |             | NINJ1                                          | horse                                    | UQCRHP4                           | RHBDD3                               | TSNAXIP1   |
|                                                             |                             |                                         | MMP9                            |                   |           |             |             | NIPA2                                          | dog                                      | USP32                             | RHOA                                 | TTC39CP1   |
|                                                             |                             |                                         | MOB4                            |                   |           |             |             | NIPBL                                          | horse                                    | USP4                              | RIMS2                                | TTC8       |
|                                                             |                             |                                         | MPND                            |                   |           |             |             | NKAIN2                                         | dog                                      | USP8P1                            | RNF213                               | TTI2       |
|                                                             |                             |                                         | MRPL49                          |                   |           |             |             | NOCT                                           | dog                                      | VAV3                              | RNF6                                 | TUSC2      |
|                                                             |                             |                                         | MRPS5                           |                   |           |             |             | NOL4                                           | dog                                      | VN1R66P                           | RPL12P41                             | U3         |
|                                                             |                             |                                         | MTMR4                           |                   |           |             |             | NOLC1                                          | cat                                      | VN1R67P                           | RPL27AP                              | UBE2D3P3   |
|                                                             |                             |                                         | MTRNR2L7                        |                   |           |             |             | NOSTRIN                                        | cat                                      | VPR8P                             | RPL32                                | UBL5P4     |
|                                                             |                             |                                         | MUSTN1                          |                   |           |             |             | NOTCH2                                         | cat                                      | VPS41                             | RPL32P1                              | USP24P1    |
|                                                             |                             |                                         | MYH3                            |                   |           |             |             | NPAS3                                          | cattle                                   | WASF5P                            | RPL35P6                              | USP43      |
|                                                             |                             |                                         | MYHAS                           |                   |           |             |             | NPFRR2                                         | cat                                      | XKR3                              | RPL36AP40                            | USP46      |
|                                                             |                             |                                         | MYL4                            |                   |           |             |             | NPTX1                                          | cattle                                   | XPNPEP3                           | RPS6P7                               | USP8P1     |
|                                                             |                             |                                         | MYLK3                           |                   |           |             |             | NR2F2                                          | cattle                                   | XPO5                              | RSP02                                | VCAN       |
|                                                             |                             |                                         | NADK2                           |                   |           |             |             | NR3C2                                          | horse                                    | YWHAZP4                           | RTTN                                 | VDAC1P5    |
|                                                             |                             |                                         | NAT6                            |                   |           |             |             | NRF1                                           | dog                                      | ZCW/PW1                           | RWDD4P2                              | VPS13B     |
|                                                             |                             |                                         | NAT8                            |                   |           |             |             | NRG2                                           | dog, cat, cattle                         | ZNF514                            | SBF2                                 | VPS26BP1   |
|                                                             |                             |                                         | NAV3                            |                   |           |             |             | NRG4                                           | cattle                                   | ZNF568                            | SCARA3                               | VPS39      |
|                                                             |                             |                                         | NCOA5                           |                   |           |             |             | NRXN1                                          | cattle                                   | ZNF670                            | SCN10A                               | VPS8       |
|                                                             |                             |                                         | NCOA6                           |                   |           |             |             | NT5DC2                                         | horse                                    | ZNF675                            | SCUBE2                               | VWF        |
|                                                             |                             |                                         | NDUFA11                         |                   |           |             |             | NTAN1                                          | dog                                      | ZNF695                            | SDHAP3                               | WASF5P     |
|                                                             |                             |                                         | NEAT1                           |                   |           |             |             | NTM                                            | horse                                    | ZNF720                            | SDK1                                 | WDR95P     |
|                                                             |                             |                                         | NEB                             |                   |           |             |             | NUDT15                                         | cat                                      | ZNF725P                           | SEC11A                               | WDR95P     |
|                                                             |                             |                                         | NEDD1                           |                   |           |             |             | NUMB                                           | horse                                    | ZNF815P                           | SEC63                                | WWP2       |
|                                                             |                             |                                         | NEK4                            |                   |           |             |             | NUP133                                         | horse                                    | ZNF92                             | SEMA5B                               | YIF1A      |
|                                                             |                             |                                         | NETO2                           |                   |           |             |             | NUP54                                          | dog                                      | ZPBP                              | SENP7                                | ZDHHHC20P2 |
|                                                             |                             |                                         | NEXN                            |                   |           |             |             | NXPE3                                          | dog                                      | ZSWIM7                            | SERPINA3                             | ZDHHHC24   |
|                                                             |                             |                                         | NRG3                            |                   |           |             |             | OLIG1                                          | cattle                                   |                                   | SH2D4A                               | ZMYM1      |
|                                                             |                             |                                         | NISCH                           |                   |           |             |             | OMA1                                           | dog                                      |                                   | SLC17A6                              | ZMYND10    |
|                                                             |                             |                                         | NLK                             |                   |           |             |             | OPCML                                          | horse                                    |                                   | SLC25A1P2                            | ZNF394     |
|                                                             |                             |                                         | NLRX1                           |                   |           |             |             | OPTC                                           | cat                                      |                                   | SLC25A26                             | ZNF48      |
|                                                             |                             |                                         | NMUR2                           |                   |           |             |             | OR10K1                                         | cat                                      |                                   | SLC38A8                              | ZNF493     |
|                                                             |                             |                                         | NOTO                            |                   |           |             |             | OR13C8                                         | cattle                                   |                                   | SLC6A16                              | ZNF675     |
|                                                             |                             |                                         | NPRL2                           |                   |           |             |             | OR2B11                                         | cat                                      |                                   | SLC9C2                               | ZNF682     |
|                                                             |                             |                                         | NR0B2                           |                   |           |             |             | OR4D6                                          | cat                                      |                                   | SLFN12                               | ZNF747     |
|                                                             |                             |                                         | NR2F1                           |                   |           |             |             | OR51A7                                         | cattle                                   |                                   | SMARCD2                              | ZNF768     |
|                                                             |                             |                                         | NT5DC2                          |                   |           |             |             | OR9A4                                          | dog                                      |                                   | SMC3                                 | ZNF771     |
|                                                             |                             |                                         | NTM                             |                   |           |             |             | ORF olfactory receptor family cluster (Chromo: | cattle                                   |                                   | SNRPG                                | ZNF789     |
|                                                             |                             |                                         | NTRK2                           |                   |           |             |             | ORF olfactory receptor family cluster (Chromo  | cattle                                   |                                   | SOC2P2                               |            |
|                                                             |                             |                                         | NUDC                            |                   |           |             |             | ORF olfactory receptor family cluster (Chromo  | cattle                                   |                                   | SOD2                                 |            |
|                                                             |                             |                                         | NUFIP1                          |                   |           |             |             | ORF olfactory receptor family cluster (Chromo  | cattle                                   |                                   | SORBS1                               |            |
|                                                             |                             |                                         | NUP37                           |                   |           |             |             | OTOF                                           | cat                                      |                                   | SORBS2                               |            |
|                                                             |                             |                                         | NWD1                            |                   |           |             |             | PAFAH2                                         | cat                                      |                                   | SP140                                |            |
|                                                             |                             |                                         | NWD2                            |                   |           |             |             | PARP12                                         | dog                                      |                                   | SPATS2L                              |            |
|                                                             |                             |                                         | NXPH1                           |                   |           |             |             | PARVG                                          | cat                                      |                                   | SPDL1                                |            |
|                                                             |                             |                                         | NYAP2                           |                   |           |             |             | PCDH18                                         | cattle                                   |                                   | SPECC1L                              |            |
|                                                             |                             |                                         | ORAI3                           |                   |           |             |             | PCDHA1                                         | cat                                      |                                   | SPINT3                               |            |
|                                                             |                             |                                         | OTUD4                           |                   |           |             |             | PCDHB4                                         | cat                                      |                                   | SPOCK3                               |            |
|                                                             |                             |                                         | OTX1                            |                   |           |             |             | PCK5                                           | horse                                    |                                   | SPTLC3                               |            |
|                                                             |                             |                                         | PACSN1                          |                   |           |             |             | PDE4D                                          | dog                                      |                                   | ST6GAL2                              |            |
|                                                             |                             |                                         | PAIP2                           |                   |           |             |             | PDE4DIP                                        | horse                                    |                                   | ST6GALNAC3                           |            |
|                                                             |                             |                                         | PARP3                           |                   |           |             |             | PDE5A                                          | horse                                    |                                   | STAB2                                |            |
|                                                             |                             |                                         | PARPBP                          |                   |           |             |             | PDE7B                                          | dog                                      |                                   | STAT4                                |            |
|                                                             |                             |                                         | PATL2                           |                   |           |             |             | PDILT                                          | dog                                      |                                   | STK31                                |            |
|                                                             |                             |                                         | PBRM1                           |                   |           |             |             | PDRG1                                          | horse                                    |                                   | STXBP5L                              |            |
|                                                             |                             |                                         | PC                              |                   |           |             |             | PDXDC1                                         | dog                                      |                                   | TBC1D22A                             |            |
|                                                             |                             |                                         | PCBP4                           |                   |           |             |             | PEX7                                           | cattle                                   |                                   | TBC1D27                              |            |

| AMH POOL                                                          |                                |                                            |                                    | DOMESTICATES POOL |           |             |             |                                             | GREAT APE POOL (Cagan et al. 2016)                |                                      |                                        |
|-------------------------------------------------------------------|--------------------------------|--------------------------------------------|------------------------------------|-------------------|-----------|-------------|-------------|---------------------------------------------|---------------------------------------------------|--------------------------------------|----------------------------------------|
| Peyrègne et al. 2016<br>(SF1, SF2, Table 2<br>and Table S7) [375] | Racimo 2016 (Table<br>3) [326] | Prüfer et al. 2014<br>(Table S19b.1) [108] | TOTAL AMH (no<br>duplicates) [742] | DOG [229]         | CAT [291] | CATTLE [78] | HORSE [109] | TOTAL DOMESTICATES (no duplicates)<br>[691] | Chimp ( <i>P.t.</i><br><i>troglodytes</i> ) [415] | Orango ( <i>P. abelii</i> )<br>[500] | (Gorilla) <i>G.g. gorilla</i><br>[426] |
|                                                                   |                                |                                            | PCCB                               |                   |           |             |             | PHF2                                        | horse                                             |                                      | TBRG4                                  |
|                                                                   |                                |                                            | PCDH17                             |                   |           |             |             | PHF20                                       | horse                                             |                                      | TDP1                                   |
|                                                                   |                                |                                            | PCDH9                              |                   |           |             |             | PHLDB3                                      | cat                                               |                                      | TDRKH                                  |
|                                                                   |                                |                                            | PCGF6                              |                   |           |             |             | PIK3C3                                      | horse                                             |                                      | TF                                     |
|                                                                   |                                |                                            | PCNX                               |                   |           |             |             | PITRM1                                      | cat                                               |                                      | TFG                                    |
|                                                                   |                                |                                            | PDCD4                              |                   |           |             |             | PJA2                                        | cat                                               |                                      | TMEM117                                |
|                                                                   |                                |                                            | PDE4B                              |                   |           |             |             | PKD1L1                                      | dog                                               |                                      | TMEM200B                               |
|                                                                   |                                |                                            | PDIA3                              |                   |           |             |             | PLA2G2E                                     | cat                                               |                                      | TMEM40                                 |
|                                                                   |                                |                                            | PDZD2                              |                   |           |             |             | PLA2G3                                      | cat                                               |                                      | TMEM5                                  |
|                                                                   |                                |                                            | PDZD3                              |                   |           |             |             | PLAC1                                       | cat                                               |                                      | TMPRSS2                                |
|                                                                   |                                |                                            | PEL11                              |                   |           |             |             | PLAC8L1                                     | cat, cattle                                       |                                      | TMPRSS3                                |
|                                                                   |                                |                                            | PEX13                              |                   |           |             |             | PLAG1                                       | cattle                                            |                                      | TNFRSF13B                              |
|                                                                   |                                |                                            | PHACTR1                            |                   |           |             |             | PLCE1                                       | dog                                               |                                      | TNFRSF1B                               |
|                                                                   |                                |                                            | PHF7                               |                   |           |             |             | PLEKHH1                                     | cat                                               |                                      | TNKS1BP1                               |
|                                                                   |                                |                                            | PHKB                               |                   |           |             |             | PLEKHM3                                     | dog                                               |                                      | TNPO1                                  |
|                                                                   |                                |                                            | PIGV                               |                   |           |             |             | PLIN3                                       | cat                                               |                                      | TP53BP1                                |
|                                                                   |                                |                                            | PIK3CG                             |                   |           |             |             | PLXNA4                                      | horse                                             |                                      | TPRXL                                  |
|                                                                   |                                |                                            | PLA2G16                            |                   |           |             |             | PML                                         | cat                                               |                                      | TPX2                                   |
|                                                                   |                                |                                            | PLA2G4D                            |                   |           |             |             | Pol                                         | cattle                                            |                                      | TRAT1                                  |
|                                                                   |                                |                                            | PLA2G4E                            |                   |           |             |             | POLI                                        | dog                                               |                                      | TRIM25                                 |
|                                                                   |                                |                                            | PLA2GDF                            |                   |           |             |             | POLR1E                                      | dog                                               |                                      | TRIM34                                 |
|                                                                   |                                |                                            | PLAC8L1                            |                   |           |             |             | POP1                                        | horse                                             |                                      | TRIM6                                  |
|                                                                   |                                |                                            | PLXDC2                             |                   |           |             |             | PPAP2A                                      | cat                                               |                                      | TSG101                                 |
|                                                                   |                                |                                            | PMCH                               |                   |           |             |             | PPAPDC1B                                    | cat                                               |                                      | TTC23L                                 |
|                                                                   |                                |                                            | POC1A                              |                   |           |             |             | PPFIBP1                                     | cat                                               |                                      | TTN                                    |
|                                                                   |                                |                                            | PODXL                              |                   |           |             |             | PPM1D                                       | horse                                             |                                      | TUBA8                                  |
|                                                                   |                                |                                            | POMGNT1                            |                   |           |             |             | PPP1R13B                                    | cat                                               |                                      | TUBB4BP5                               |
|                                                                   |                                |                                            | POTEC                              |                   |           |             |             | PPP2CA                                      | horse                                             |                                      | U2SURP                                 |
|                                                                   |                                |                                            | POU2F2                             |                   |           |             |             | PRICKLE4                                    | cat                                               |                                      | U3                                     |
|                                                                   |                                |                                            | POU3F1                             |                   |           |             |             | PRKAG1                                      | cat                                               |                                      | UBASH3A                                |
|                                                                   |                                |                                            | POU5F2                             |                   |           |             |             | PRKCZ                                       | horse                                             |                                      | UTP20                                  |
|                                                                   |                                |                                            | PPAP2A                             |                   |           |             |             | PRKG2                                       | cat                                               |                                      | VN1R20P                                |
|                                                                   |                                |                                            | PPAPDC1A                           |                   |           |             |             | PRMT3                                       | horse                                             |                                      | VN1R31P                                |
|                                                                   |                                |                                            | PPAPDC1B                           |                   |           |             |             | PRR11                                       | cat                                               |                                      | VN1R32P                                |
|                                                                   |                                |                                            | PPIL4                              |                   |           |             |             | PRX                                         | cat                                               |                                      | VN1R33P                                |
|                                                                   |                                |                                            | PPIP5K1                            |                   |           |             |             | PSMB7                                       | horse                                             |                                      | VN2R9P                                 |
|                                                                   |                                |                                            | PPM1E                              |                   |           |             |             | PSPH                                        | cat                                               |                                      | VWA5A                                  |
|                                                                   |                                |                                            | PPM1M                              |                   |           |             |             | PSTK                                        | cat                                               |                                      | WDFY4                                  |
|                                                                   |                                |                                            | PPP2R1B                            |                   |           |             |             | PTPN4                                       | horse                                             |                                      | WDR47                                  |
|                                                                   |                                |                                            | PRADC1                             |                   |           |             |             | PTPRR                                       | cat                                               |                                      | WDR62                                  |
|                                                                   |                                |                                            | PRDM10                             |                   |           |             |             | PTPRS                                       | cat                                               |                                      | WDR87                                  |
|                                                                   |                                |                                            | PRDM2                              |                   |           |             |             | PUSL1                                       | cat                                               |                                      | XKR3                                   |
|                                                                   |                                |                                            | PRKAR2B                            |                   |           |             |             | PVRL3                                       | cattle                                            |                                      | YTHDF2                                 |
|                                                                   |                                |                                            | PRKCD                              |                   |           |             |             | Q2ABD2                                      | dog                                               |                                      | ZDHHFC13                               |
|                                                                   |                                |                                            | PRKDC                              |                   |           |             |             | RAB3GAP1                                    | dog                                               |                                      | ZDHHFC20P2                             |
|                                                                   |                                |                                            | PROM2                              |                   |           |             |             | RABGAP1L                                    | dog                                               |                                      | ZNF280D                                |
|                                                                   |                                |                                            | PRR11                              |                   |           |             |             | RABL3                                       | cat                                               |                                      | ZNF33BP1                               |
|                                                                   |                                |                                            | PSTPIP2                            |                   |           |             |             | RALY                                        | dog                                               |                                      | ZNF592                                 |
|                                                                   |                                |                                            | PTPN23                             |                   |           |             |             | RANBP17                                     | dog                                               |                                      | ZNF605                                 |
|                                                                   |                                |                                            | PTPRD                              |                   |           |             |             | RAPH1                                       | dog                                               |                                      | ZNF7                                   |
|                                                                   |                                |                                            | PUS10                              |                   |           |             |             | RBM11                                       | cat                                               |                                      | ZNF718                                 |
|                                                                   |                                |                                            | PVRL3                              |                   |           |             |             | RBP5                                        | cat                                               |                                      | ZNF804B                                |
|                                                                   |                                |                                            | QSER1                              |                   |           |             |             | RCSD1                                       | cat                                               |                                      | ZNF850                                 |
|                                                                   |                                |                                            | RAB11FIP5                          |                   |           |             |             | REEP1                                       | dog                                               |                                      | ZNF861P                                |
|                                                                   |                                |                                            | RAB28                              |                   |           |             |             | RELL1                                       | cat                                               |                                      | ZSWIM5                                 |
|                                                                   |                                |                                            | RABAC1                             |                   |           |             |             | RELT                                        | dog                                               |                                      |                                        |
|                                                                   |                                |                                            | RAD51C                             |                   |           |             |             | RFTN2                                       | dog                                               |                                      |                                        |
|                                                                   |                                |                                            | RAD54L                             |                   |           |             |             | RG9MTD3                                     | dog                                               |                                      |                                        |
|                                                                   |                                |                                            | RAD54L2                            |                   |           |             |             | RHBDD1                                      | cat                                               |                                      |                                        |
|                                                                   |                                |                                            | RANBP1                             |                   |           |             |             | RHPN1                                       | horse                                             |                                      |                                        |
|                                                                   |                                |                                            | RANBP3                             |                   |           |             |             | RIMKLA                                      | cat                                               |                                      |                                        |
|                                                                   |                                |                                            | RARRES3                            |                   |           |             |             | RNASE6                                      | cat                                               |                                      |                                        |
|                                                                   |                                |                                            | RASA1                              |                   |           |             |             | RNF103                                      | dog                                               |                                      |                                        |
|                                                                   |                                |                                            | RASGEF1A                           |                   |           |             |             | RNF144B                                     | cattle                                            |                                      |                                        |
|                                                                   |                                |                                            | RASSF1                             |                   |           |             |             | RNPC3                                       | dog, cat                                          |                                      |                                        |
|                                                                   |                                |                                            | RASSF3                             |                   |           |             |             | ROBO1                                       | cattle                                            |                                      |                                        |
|                                                                   |                                |                                            | RB1CC1                             |                   |           |             |             | RPL3                                        | dog                                               |                                      |                                        |
|                                                                   |                                |                                            | RBFOX2                             |                   |           |             |             | RPL31                                       | dog                                               |                                      |                                        |
|                                                                   |                                |                                            | RBL1                               |                   |           |             |             | RRN3                                        | dog                                               |                                      |                                        |
|                                                                   |                                |                                            | RBM14                              |                   |           |             |             | RRN3P1                                      | dog                                               |                                      |                                        |
|                                                                   |                                |                                            | RBM15B                             |                   |           |             |             | RRNRP2                                      | dog                                               |                                      |                                        |
|                                                                   |                                |                                            | RBM4                               |                   |           |             |             | RSL1D1                                      | cat                                               |                                      |                                        |
|                                                                   |                                |                                            | RBM4B                              |                   |           |             |             | RTP3                                        | cat                                               |                                      |                                        |
|                                                                   |                                |                                            | RBSG3                              |                   |           |             |             | S100A12                                     | cat                                               |                                      |                                        |
|                                                                   |                                |                                            | RCE1                               |                   |           |             |             | SAE1                                        | dog                                               |                                      |                                        |
|                                                                   |                                |                                            | REL                                |                   |           |             |             | SCARB2                                      | dog                                               |                                      |                                        |

| AMH POOL                                                          |                                |                                            |                                    | DOMESTICATES POOL |           |             |             |                                             | GREAT APE POOL (Cagan et al. 2016)                |                                      |                                        |
|-------------------------------------------------------------------|--------------------------------|--------------------------------------------|------------------------------------|-------------------|-----------|-------------|-------------|---------------------------------------------|---------------------------------------------------|--------------------------------------|----------------------------------------|
| Peyrègne et al. 2016<br>(SF1, SF2, Table 2<br>and Table S7) [375] | Racimo 2016 (Table<br>3) [326] | Prüfer et al. 2014<br>(Table S19b.1) [108] | TOTAL AMH (no<br>duplicates) [742] | DOG [229]         | CAT [291] | CATTLE [78] | HORSE [109] | TOTAL DOMESTICATES (no duplicates)<br>[691] | Chimp ( <i>P.t.</i><br><i>troglodytes</i> ) [415] | Orango ( <i>P. abelii</i> )<br>[500] | (Gorilla) <i>G.g. gorilla</i><br>[426] |
|                                                                   |                                |                                            | RET                                |                   |           |             |             | SCN9A                                       |                                                   |                                      |                                        |
|                                                                   |                                |                                            | RFT1                               |                   |           |             |             | SCP2D1                                      |                                                   |                                      |                                        |
|                                                                   |                                |                                            | RFTN2                              |                   |           |             |             | SCPEP1                                      |                                                   |                                      |                                        |
|                                                                   |                                |                                            | RGS6                               |                   |           |             |             | SCRIB                                       |                                                   |                                      |                                        |
|                                                                   |                                |                                            | RIF1                               |                   |           |             |             | SDAD1                                       |                                                   |                                      |                                        |
|                                                                   |                                |                                            | RNF133                             |                   |           |             |             | SDK2                                        |                                                   |                                      |                                        |
|                                                                   |                                |                                            | RNF148                             |                   |           |             |             | SEC24A                                      |                                                   |                                      |                                        |
|                                                                   |                                |                                            | RNF220                             |                   |           |             |             | SEC63                                       |                                                   |                                      |                                        |
|                                                                   |                                |                                            | RNF26                              |                   |           |             |             | SEMA3D                                      |                                                   |                                      |                                        |
|                                                                   |                                |                                            | RNF43                              |                   |           |             |             | SEMA6A                                      |                                                   |                                      |                                        |
|                                                                   |                                |                                            | RNF44                              |                   |           |             |             | SENP5                                       |                                                   |                                      |                                        |
|                                                                   |                                |                                            | RNPC3                              |                   |           |             |             | SENP7                                       |                                                   |                                      |                                        |
|                                                                   |                                |                                            | ROBO2                              |                   |           |             |             | SEPT10                                      |                                                   |                                      |                                        |
|                                                                   |                                |                                            | ROCK1                              |                   |           |             |             | SERINC3                                     |                                                   |                                      |                                        |
|                                                                   |                                |                                            | RPL13AP6                           |                   |           |             |             | SETBP1                                      |                                                   |                                      |                                        |
|                                                                   |                                |                                            | RPL29                              |                   |           |             |             | SETD9                                       |                                                   |                                      |                                        |
|                                                                   |                                |                                            | RPS18P9                            |                   |           |             |             | SETMAR                                      |                                                   |                                      |                                        |
|                                                                   |                                |                                            | RPS6KA1                            |                   |           |             |             | SF3B1                                       |                                                   |                                      |                                        |
|                                                                   |                                |                                            | RRP9                               |                   |           |             |             | SGCD                                        |                                                   |                                      |                                        |
|                                                                   |                                |                                            | RSPO3                              |                   |           |             |             | SH2D5                                       |                                                   |                                      |                                        |
|                                                                   |                                |                                            | SAMHD1                             |                   |           |             |             | SH3GL2                                      |                                                   |                                      |                                        |
|                                                                   |                                |                                            | SCAP                               |                   |           |             |             | SHC4                                        |                                                   |                                      |                                        |
|                                                                   |                                |                                            | SCMH1                              |                   |           |             |             | SIAE                                        |                                                   |                                      |                                        |
|                                                                   |                                |                                            | SCYL3                              |                   |           |             |             | SKA2                                        |                                                   |                                      |                                        |
|                                                                   |                                |                                            | SEC23IP                            |                   |           |             |             | SKP1                                        |                                                   |                                      |                                        |
|                                                                   |                                |                                            | SEC24D                             |                   |           |             |             | SLC22A13                                    |                                                   |                                      |                                        |
|                                                                   |                                |                                            | SEMA3F                             |                   |           |             |             | SLC22A15                                    |                                                   |                                      |                                        |
|                                                                   |                                |                                            | SEMA3G                             |                   |           |             |             | SLC22A18                                    |                                                   |                                      |                                        |
|                                                                   |                                |                                            | SEMA6D                             |                   |           |             |             | SLC25A38                                    |                                                   |                                      |                                        |
|                                                                   |                                |                                            | SEPT4                              |                   |           |             |             | SLC35D1                                     |                                                   |                                      |                                        |
|                                                                   |                                |                                            | SERF2                              |                   |           |             |             | SLC35F5                                     |                                                   |                                      |                                        |
|                                                                   |                                |                                            | SERINC4HYPK                        |                   |           |             |             | SLC39A7                                     |                                                   |                                      |                                        |
|                                                                   |                                |                                            | SESN1                              |                   |           |             |             | SLC39A8                                     |                                                   |                                      |                                        |
|                                                                   |                                |                                            | SETD1A                             |                   |           |             |             | SLC41A2                                     |                                                   |                                      |                                        |
|                                                                   |                                |                                            | SF3A3                              |                   |           |             |             | SLC43A1                                     |                                                   |                                      |                                        |
|                                                                   |                                |                                            | SF3B1                              |                   |           |             |             | SLC46A1                                     |                                                   |                                      |                                        |
|                                                                   |                                |                                            | SFMBT1                             |                   |           |             |             | SLC5A1                                      |                                                   |                                      |                                        |
|                                                                   |                                |                                            | SFXN5                              |                   |           |             |             | SLC5A4                                      |                                                   |                                      |                                        |
|                                                                   |                                |                                            | SGMS2                              |                   |           |             |             | SLC6A1                                      |                                                   |                                      |                                        |
|                                                                   |                                |                                            | SGSM3                              |                   |           |             |             | SLC6A17                                     |                                                   |                                      |                                        |
|                                                                   |                                |                                            | SH3GL1                             |                   |           |             |             | SLC9A6                                      |                                                   |                                      |                                        |
|                                                                   |                                |                                            | SH3RF2                             |                   |           |             |             | SLCO1A2                                     |                                                   |                                      |                                        |
|                                                                   |                                |                                            | SHOC2                              |                   |           |             |             | SMC4                                        |                                                   |                                      |                                        |
|                                                                   |                                |                                            | SIK2                               |                   |           |             |             | SMG1                                        |                                                   |                                      |                                        |
|                                                                   |                                |                                            | SIN3B                              |                   |           |             |             | SMG6                                        |                                                   |                                      |                                        |
|                                                                   |                                |                                            | SIPA1L1                            |                   |           |             |             | SMIM23                                      |                                                   |                                      |                                        |
|                                                                   |                                |                                            | SKA2                               |                   |           |             |             | SMO                                         |                                                   |                                      |                                        |
|                                                                   |                                |                                            | SKIV2L2                            |                   |           |             |             | SMYD2                                       |                                                   |                                      |                                        |
|                                                                   |                                |                                            | SKP2                               |                   |           |             |             | SNAP29                                      |                                                   |                                      |                                        |
|                                                                   |                                |                                            | SLC12A5                            |                   |           |             |             | SNRPD1                                      |                                                   |                                      |                                        |
|                                                                   |                                |                                            | SLC16A1                            |                   |           |             |             | SPATA19                                     |                                                   |                                      |                                        |
|                                                                   |                                |                                            | SLC1A1                             |                   |           |             |             | SPATA21                                     |                                                   |                                      |                                        |
|                                                                   |                                |                                            | SLC25A17                           |                   |           |             |             | SPATA7                                      |                                                   |                                      |                                        |
|                                                                   |                                |                                            | SLC26A3                            |                   |           |             |             | SPERT                                       |                                                   |                                      |                                        |
|                                                                   |                                |                                            | SLC26A4                            |                   |           |             |             | SPHKAP                                      |                                                   |                                      |                                        |
|                                                                   |                                |                                            | SLC2A5                             |                   |           |             |             | SPINT1                                      |                                                   |                                      |                                        |
|                                                                   |                                |                                            | SLC30A2                            |                   |           |             |             | SPTAN1                                      |                                                   |                                      |                                        |
|                                                                   |                                |                                            | SLC35B1                            |                   |           |             |             | SPTBN5                                      |                                                   |                                      |                                        |
|                                                                   |                                |                                            | SLC35E1                            |                   |           |             |             | SREBF1                                      |                                                   |                                      |                                        |
|                                                                   |                                |                                            | SLC38A9                            |                   |           |             |             | SRP72                                       |                                                   |                                      |                                        |
|                                                                   |                                |                                            | SLC4A10                            |                   |           |             |             | SRRM2                                       |                                                   |                                      |                                        |
|                                                                   |                                |                                            | SLC4A4                             |                   |           |             |             | STAB1                                       |                                                   |                                      |                                        |
|                                                                   |                                |                                            | SLC9A1                             |                   |           |             |             | STARD5                                      |                                                   |                                      |                                        |
|                                                                   |                                |                                            | SLFNL1                             |                   |           |             |             | STARD6                                      |                                                   |                                      |                                        |
|                                                                   |                                |                                            | SLIT2                              |                   |           |             |             | STK10                                       |                                                   |                                      |                                        |
|                                                                   |                                |                                            | SLITRK1                            |                   |           |             |             | STK11IP                                     |                                                   |                                      |                                        |
|                                                                   |                                |                                            | SLITRK3                            |                   |           |             |             | STS                                         |                                                   |                                      |                                        |
|                                                                   |                                |                                            | SMAD1                              |                   |           |             |             | STX7                                        |                                                   |                                      |                                        |
|                                                                   |                                |                                            | SMAD9                              |                   |           |             |             | STXBP6                                      |                                                   |                                      |                                        |
|                                                                   |                                |                                            | SMG8                               |                   |           |             |             | SUN3                                        |                                                   |                                      |                                        |
|                                                                   |                                |                                            | SMIM4                              |                   |           |             |             | SURF2                                       |                                                   |                                      |                                        |
|                                                                   |                                |                                            | SMIM7                              |                   |           |             |             | SUSD3                                       |                                                   |                                      |                                        |
|                                                                   |                                |                                            | SMYD5                              |                   |           |             |             | SYNM                                        |                                                   |                                      |                                        |
|                                                                   |                                |                                            | SNAI2                              |                   |           |             |             | SYTL1                                       |                                                   |                                      |                                        |
|                                                                   |                                |                                            | SNAP23                             |                   |           |             |             | TAOK1                                       |                                                   |                                      |                                        |
|                                                                   |                                |                                            | SNF                                |                   |           |             |             | TAS2R1                                      |                                                   |                                      |                                        |



| AMH POOL                                                          |                                |                                            |                                    | DOMESTICATES POOL |           |             |             |                                             | GREAT APE POOL (Cagan et al. 2016)          |                                      |                                        |
|-------------------------------------------------------------------|--------------------------------|--------------------------------------------|------------------------------------|-------------------|-----------|-------------|-------------|---------------------------------------------|---------------------------------------------|--------------------------------------|----------------------------------------|
| Peyrègne et al. 2016<br>(SF1, SF2, Table 2<br>and Table S7) [375] | Racimo 2016 (Table<br>3) [326] | Prüfer et al. 2014<br>(Table S19b.1) [108] | TOTAL AMH (no<br>duplicates) [742] | DOG [229]         | CAT [291] | CATTLE [78] | HORSE [109] | TOTAL DOMESTICATES (no duplicates)<br>[691] | Chimp ( <i>P.t.<br/>troglodytes</i> ) [415] | Orango ( <i>P. abelii</i> )<br>[500] | (Gorilla) <i>G.g. gorilla</i><br>[426] |
|                                                                   |                                |                                            | SNHG4                              |                   |           |             |             | TAS2R16                                     |                                             |                                      |                                        |
|                                                                   |                                |                                            | SNRPD1                             |                   |           |             |             | TAS2R3                                      |                                             |                                      |                                        |
|                                                                   |                                |                                            | SORCS1                             |                   |           |             |             | TAS2R38                                     |                                             |                                      |                                        |
|                                                                   |                                |                                            | SORCS2                             |                   |           |             |             | TBC1D9                                      |                                             |                                      |                                        |
|                                                                   |                                |                                            | SORCS3                             |                   |           |             |             | TBXAS1                                      |                                             |                                      |                                        |
|                                                                   |                                |                                            | SPATS2L                            |                   |           |             |             | TCTN1                                       |                                             |                                      |                                        |
|                                                                   |                                |                                            | SPCS1                              |                   |           |             |             | TCTN3                                       |                                             |                                      |                                        |
|                                                                   |                                |                                            | SPG11                              |                   |           |             |             | TEKT3                                       |                                             |                                      |                                        |
|                                                                   |                                |                                            | SPIDR                              |                   |           |             |             | TEX14                                       |                                             |                                      |                                        |
|                                                                   |                                |                                            | SPOP                               |                   |           |             |             | TF                                          |                                             |                                      |                                        |
|                                                                   |                                |                                            | SPTBN2                             |                   |           |             |             | TFCP2L1                                     |                                             |                                      |                                        |
|                                                                   |                                |                                            | SRSF2                              |                   |           |             |             | TH                                          |                                             |                                      |                                        |
|                                                                   |                                |                                            | ST7                                |                   |           |             |             | THBS2                                       |                                             |                                      |                                        |
|                                                                   |                                |                                            | STAB1                              |                   |           |             |             | THEGL                                       |                                             |                                      |                                        |
|                                                                   |                                |                                            | STAC                               |                   |           |             |             | THUMPD1                                     |                                             |                                      |                                        |
|                                                                   |                                |                                            | STAG1                              |                   |           |             |             | THYN1                                       |                                             |                                      |                                        |
|                                                                   |                                |                                            | STAMBP                             |                   |           |             |             | TLX3                                        |                                             |                                      |                                        |
|                                                                   |                                |                                            | STARD9                             |                   |           |             |             | TMEM114                                     |                                             |                                      |                                        |
|                                                                   |                                |                                            | STK3                               |                   |           |             |             | TMEM132D                                    |                                             |                                      |                                        |
|                                                                   |                                |                                            | STMN2                              |                   |           |             |             | TMEM159                                     |                                             |                                      |                                        |
|                                                                   |                                |                                            | STRC                               |                   |           |             |             | TMEM242                                     |                                             |                                      |                                        |
|                                                                   |                                |                                            | STX1A                              |                   |           |             |             | TMEM59L                                     |                                             |                                      |                                        |
|                                                                   |                                |                                            | STX1B                              |                   |           |             |             | TMEM71                                      |                                             |                                      |                                        |
|                                                                   |                                |                                            | SUPT4H1                            |                   |           |             |             | TNFRSF9                                     |                                             |                                      |                                        |
|                                                                   |                                |                                            | SYNPO2                             |                   |           |             |             | TNKS2                                       |                                             |                                      |                                        |
|                                                                   |                                |                                            | SYT1                               |                   |           |             |             | TOE1                                        |                                             |                                      |                                        |
|                                                                   |                                |                                            | SYT6                               |                   |           |             |             | TP53BP1                                     |                                             |                                      |                                        |
|                                                                   |                                |                                            | SYTL1                              |                   |           |             |             | TRAPP8                                      |                                             |                                      |                                        |
|                                                                   |                                |                                            | SYVN1                              |                   |           |             |             | TRBV25OR9-2                                 |                                             |                                      |                                        |
|                                                                   |                                |                                            | TAC4                               |                   |           |             |             | TRIM16                                      |                                             |                                      |                                        |
|                                                                   |                                |                                            | TAF5                               |                   |           |             |             | TRIM59                                      |                                             |                                      |                                        |
|                                                                   |                                |                                            | TANC2                              |                   |           |             |             | TRIO                                        |                                             |                                      |                                        |
|                                                                   |                                |                                            | TAS2R16                            |                   |           |             |             | TRMT61A                                     |                                             |                                      |                                        |
|                                                                   |                                |                                            | TBC1D23                            |                   |           |             |             | TRPV6                                       |                                             |                                      |                                        |
|                                                                   |                                |                                            | TBX1                               |                   |           |             |             | TRY1                                        |                                             |                                      |                                        |
|                                                                   |                                |                                            | TDRD3                              |                   |           |             |             | TRY2                                        |                                             |                                      |                                        |
|                                                                   |                                |                                            | TDRD7                              |                   |           |             |             | TRY3                                        |                                             |                                      |                                        |
|                                                                   |                                |                                            | TEX14                              |                   |           |             |             | TSTD2                                       |                                             |                                      |                                        |
|                                                                   |                                |                                            | TEX264                             |                   |           |             |             | TTC39A                                      |                                             |                                      |                                        |
|                                                                   |                                |                                            | TFAP2D                             |                   |           |             |             | TUBGCP5                                     |                                             |                                      |                                        |
|                                                                   |                                |                                            | TGM4                               |                   |           |             |             | TVFP23B                                     |                                             |                                      |                                        |
|                                                                   |                                |                                            | TGM5                               |                   |           |             |             | TVFP23C                                     |                                             |                                      |                                        |
|                                                                   |                                |                                            | TGM7                               |                   |           |             |             | TXN2                                        |                                             |                                      |                                        |
|                                                                   |                                |                                            | THSD7B                             |                   |           |             |             | TXNRD2                                      |                                             |                                      |                                        |
|                                                                   |                                |                                            | THTPA                              |                   |           |             |             | TYK2                                        |                                             |                                      |                                        |
|                                                                   |                                |                                            | TK2                                |                   |           |             |             | U2                                          |                                             |                                      |                                        |
|                                                                   |                                |                                            | TKT                                |                   |           |             |             | UBE2B                                       |                                             |                                      |                                        |
|                                                                   |                                |                                            | TLE3                               |                   |           |             |             | UBXN10                                      |                                             |                                      |                                        |
|                                                                   |                                |                                            | TLR9                               |                   |           |             |             | ULBP3                                       |                                             |                                      |                                        |
|                                                                   |                                |                                            | TM7SF2                             |                   |           |             |             | UMOD                                        |                                             |                                      |                                        |
|                                                                   |                                |                                            | TMEM110                            |                   |           |             |             | UNC93A                                      |                                             |                                      |                                        |
|                                                                   |                                |                                            | TMEM115                            |                   |           |             |             | URB2                                        |                                             |                                      |                                        |
|                                                                   |                                |                                            | TMEM123                            |                   |           |             |             | USP45                                       |                                             |                                      |                                        |
|                                                                   |                                |                                            | TMEM17                             |                   |           |             |             | UVRAG                                       |                                             |                                      |                                        |
|                                                                   |                                |                                            | TMEM222                            |                   |           |             |             | V1R                                         |                                             |                                      |                                        |
|                                                                   |                                |                                            | TMEM235                            |                   |           |             |             | VDAC1                                       |                                             |                                      |                                        |
|                                                                   |                                |                                            | TMEM262                            |                   |           |             |             | VEZT                                        |                                             |                                      |                                        |
|                                                                   |                                |                                            | TMEM38A                            |                   |           |             |             | VPS26B                                      |                                             |                                      |                                        |
|                                                                   |                                |                                            | TMEM42                             |                   |           |             |             | VRK1                                        |                                             |                                      |                                        |
|                                                                   |                                |                                            | TMEM62                             |                   |           |             |             | VWC2                                        |                                             |                                      |                                        |
|                                                                   |                                |                                            | TMEM87A                            |                   |           |             |             | VWDE                                        |                                             |                                      |                                        |
|                                                                   |                                |                                            | TMOD1                              |                   |           |             |             | WASF3                                       |                                             |                                      |                                        |
|                                                                   |                                |                                            | TNFRSF21                           |                   |           |             |             | WDR17                                       |                                             |                                      |                                        |
|                                                                   |                                |                                            | TNNC1                              |                   |           |             |             | WDR62                                       |                                             |                                      |                                        |
|                                                                   |                                |                                            | TNRC6B                             |                   |           |             |             | WDR90                                       |                                             |                                      |                                        |
|                                                                   |                                |                                            | TNS1                               |                   |           |             |             | WFDC8                                       |                                             |                                      |                                        |
|                                                                   |                                |                                            | TP53BP1                            |                   |           |             |             | WIPF2                                       |                                             |                                      |                                        |
|                                                                   |                                |                                            | TP53INP2                           |                   |           |             |             | WIPF3                                       |                                             |                                      |                                        |
|                                                                   |                                |                                            | TPD52                              |                   |           |             |             | WNK2                                        |                                             |                                      |                                        |
|                                                                   |                                |                                            | TPRKB                              |                   |           |             |             | WWC1                                        |                                             |                                      |                                        |
|                                                                   |                                |                                            | TRANK1                             |                   |           |             |             | XCR1                                        |                                             |                                      |                                        |
|                                                                   |                                |                                            | TRIM37                             |                   |           |             |             | XPBP                                        |                                             |                                      |                                        |
|                                                                   |                                |                                            | TRIM43                             |                   |           |             |             | XPC                                         |                                             |                                      |                                        |
|                                                                   |                                |                                            | TRIM69                             |                   |           |             |             | XPO6                                        |                                             |                                      |                                        |
|                                                                   |                                |                                            | TRIM71                             |                   |           |             |             | YSK4                                        |                                             |                                      |                                        |
|                                                                   |                                |                                            | TRMT2A                             |                   |           |             |             | YWHAH                                       |                                             |                                      |                                        |



**(B) Contrasts between domesticates, between AMH and each domesticate, and between great apes and domesticates**

|             | dog = 229                | cat = 291              | cattle = 78              | horse = 109            | AMH = 742                |
|-------------|--------------------------|------------------------|--------------------------|------------------------|--------------------------|
| dog = 229   |                          | $v = 5; p = 0.2575646$ | $v = 5; p = 0.002250835$ | $v = 0$                | $v = 15; p = 0.02934342$ |
| cat = 291   | $v = 5; p = 0.2575646$   |                        | $v = 3; p = 0.1111013$   | $v = 4; p = 0.0805177$ | $v = 15; p = 0.1454225$  |
| cattle = 78 | $v = 5; p = 0.002250835$ | $v = 3; p = 0.1111013$ |                          | $v = 0$                | $v = 9; p = 0.002784603$ |
| horse = 109 | $v = 0$                  | $v = 4; p = 0.0805177$ | $v = 0$                  |                        | $v = 7; p = 0.1219762$   |

$p < 0.05$

$p < 0.01$

| Intersections between domesticates |                  |                |               | Intersections between total AMH and each domesticate |              |                  |               |
|------------------------------------|------------------|----------------|---------------|------------------------------------------------------|--------------|------------------|---------------|
| DOG-CAT [5]                        | DOG-CATTLE [5]** | CAT-CATTLE [3] | CAT-HORSE [4] | AMH-DOG [15]*                                        | AMH-CAT [15] | AMH-CATTLE [9]** | AMH-HORSE [7] |
| ATXN7L1                            | FAM172A          | ADAMTS13       | BRAF          | COA5                                                 | BRAF         | ERBB4            | AMBRA1        |
| CLEC5A                             | GRIK3            | NRG2           | DCC           | COL11A1                                              | GRIA1        | FAM172A          | BRAF          |
| NRG2                               | NRG2             | PLAC8L1        | SEC24A        | COQ10B                                               | HSD3B7       | GRIK3            | CACNA1D       |
| RNPC3                              | STK10            |                | SMG6          | FAM172A                                              | ITGA9        | LRP1B            | DLGAP1        |
| VEZT                               | TMEM132D         |                |               | GGT7                                                 | MYLK3        | PLAC8L1          | NT5DC2        |
|                                    |                  |                |               | GRIK3                                                | NEK4         | PVRL3            | NTM           |
|                                    |                  |                |               | HSPD1                                                | PLAC8L1      | SNRPD1           | STAB1         |
|                                    |                  |                |               | HSPE1                                                | PPAP2A       | TAS2R16          |               |
|                                    |                  |                |               | LYST                                                 | PPAPDC1B     | ZNF521           |               |
|                                    |                  |                |               | MOB4                                                 | PRR11        |                  |               |
|                                    |                  |                |               | NCOA6                                                | RNPC3        |                  |               |
|                                    |                  |                |               | RFTN2                                                | SYTL1        |                  |               |
|                                    |                  |                |               | RNPC3                                                | TEX14        |                  |               |
|                                    |                  |                |               | SF3B1                                                | TP53BP1      |                  |               |
|                                    |                  |                |               | SKA2                                                 | ZMYND10      |                  |               |

\*  $p < 0.05$

\*\*  $p < 0.01$

| Intersections between great apes and domesticates |       |                    |             |                  |       |
|---------------------------------------------------|-------|--------------------|-------------|------------------|-------|
| DOM-CHIMP [16]                                    |       | DOM-ORANGUTAN [20] |             | DOM-GORILLA [12] |       |
| ALK                                               | horse | ACOX3              | cat         | CUX2             | dog   |
| AMBRA1                                            | horse | ADAMDEC1           | cat         | DNAH9            | horse |
| C3orf62                                           | cat   | ADAMTSL3           | cat         | FER              | cat   |
| EHP1L1                                            | cat   | ALK                | horse       | IMMP2L           | dog   |
| FAF1                                              | horse | BARD1              | cat         | MRPL11           | cat   |
| HADH                                              | cat   | DNAJB9             | cat         | OPCML            | horse |
| INPP4B                                            | cat   | FAM172A            | cattle, dog | PARVG            | cat   |
| LCAT                                              | cat   | ISG15              | cat         | PRKAG1           | cat   |
| LHFPL3                                            | dog   | KDM3A              | dog         | RSL1D1           | cat   |
| MGAM                                              | dog   | KYNU               | cat         | SCN9A            | cat   |
| NIPBL                                             | horse | NRXN1              | cattle      | SGCD             | horse |
| NXPE3                                             | dog   | PITRM1             | cat         | ZMYND10          | cat   |
| RABGAP1L                                          | dog   | PLCE1              | dog         |                  |       |
| STXBP6                                            | horse | POLI               | dog         |                  |       |
| TRBV25OR9-2                                       | dog   | RABGAP1L           | dog         |                  |       |
| ZBPB                                              | dog   | SEC63              | horse       |                  |       |
|                                                   |       | SENP7              | cat         |                  |       |
|                                                   |       | TF                 | cat         |                  |       |
|                                                   |       | TP53BP1            | cat         |                  |       |
|                                                   |       | WDR62              | cat         |                  |       |

**(C) Results of hypergeometric intersection tests on data from S4 Table (B)**

|                                       |                                                                                | <b>Domesticates</b>        |                          |                             |                         |                                 |
|---------------------------------------|--------------------------------------------------------------------------------|----------------------------|--------------------------|-----------------------------|-------------------------|---------------------------------|
|                                       |                                                                                | <b>Dog = 229</b>           | <b>Cat = 291</b>         | <b>Cattle = 78</b>          | <b>Horse = 109</b>      | <b>Total domesticates = 691</b> |
| <b>AMH</b>                            | Peyrégne et al. 2016 = <b>375</b>                                              | -                          | -                        | -                           | -                       | $v = 18; p = 0.1199135$         |
|                                       | Racimo 2016 = <b>326</b>                                                       | -                          | -                        | -                           | -                       | $v = 16; p = 0.1191519$         |
|                                       | Prüfer et al. 2014 = <b>108</b>                                                | -                          | -                        | -                           | -                       | $v = 9; p = 0.01456058 *$       |
|                                       | Prüfer et al. 2014 + Racimo 2016 = <b>419</b>                                  | -                          | -                        | -                           | -                       | $v = 24; p = 0.01478488 *$      |
|                                       | <b>Total AMH (Peyrégne et al. 2016, Racimo 2016, Prüfer et al. 2014) = 742</b> | $v = 15; p = 0.02934342 *$ | $v = 15; p = 0.1454225$  | $v = 9; p = 0.002784603 **$ | $v = 7; p = 0.1219762$  | $v = 41; p = 0.003407041 **$    |
| <b>Great apes (Cagan et al. 2016)</b> | Chimpanzee ( <i>Pan t. troglodytes</i> ) = <b>415</b>                          | $v = 6; p = 0.3614671$     | $v = 5; p = 0.7449666$   | $v = 0$                     | $v = 5; p = 0.08336393$ | $v = 16; p = 0.4008807$         |
|                                       | Orango ( <i>Pongo abelii</i> ) = <b>500</b>                                    | $v = 5; p = 0.7023469$     | $v = 12; p = 0.07285972$ | $v = 2; p = 0.598045$       | $v = 2; p = 0.7728682$  | $v = 20; p = 0.3207204$         |
|                                       | Gorilla ( <i>G. g. gorilla</i> ) = <b>426</b>                                  | $v = 2; p = 0.9619034$     | $v = 7; p = 0.4519085$   | $v = 0$                     | $v = 3; p = 0.4267467$  | $v = 12; p = 0.8291688$         |
