# Supplementary material for: Self-domestication in Homo sapiens: Insights from comparative genomics
Source: PubMed Central journal article supplement (PMC5646786; doi:10.1371/journal.pone.0185306), 2017-10-18
Supplement: pone.0185306.s006.pdf [file pone.0185306.s006.pdf]

**S5 Table. Genes overlapping between AMH and non-domesticated *Canis* (grey wolf), and non-domesticated bovine (wisent, European bison)**

**(A) Genes overlapping between AMH and grey wolf.** The overlap between each list and AMH is given in square brackets and overlapping genes are highlighted in pink. Sources: Stronen et al. 2015 <http://onlinelibrary.wiley.com/doi/10.1002/ece3.1695/full>

Pilot et al. 2014 <http://www.nature.com/hdy/journal/v112/n4/full/hdy2013122a.html>

| <b>AMH</b>  | <b>Stronen et al. T2 [3]</b> | <b>Stronen et al. TS3 [0]</b> | <b>Stronen et al. TS5 [1]</b> | <b>Pilot et al. TS4 [1]</b> |
|-------------|------------------------------|-------------------------------|-------------------------------|-----------------------------|
| ABCE1       | ADAMTS1                      | ADCY5                         | AGER                          | ADAMTS3                     |
| ABHD14A     | ADORA2A                      | ADORA2A                       | ATXN7                         | ADD2                        |
| ABHD14B     | AGTR1                        | AGER                          | BHLHE41                       | AMBP                        |
| ABHD3       | <b>ANO3</b>                  | AIRE                          | CLSTN2                        | ASTN2                       |
| ACE         | ATP2B1                       | APP                           | COL17A1                       | CACNA2D3                    |
| ACTG1P4     | BMP7                         | ATXN7                         | cOR1P2                        | CIDEC                       |
| ACTG2       | COL9A3                       | BHLHE41                       | CPT1A                         | CX984702                    |
| ACY1        | CP                           | CAFA-T2R46                    | CTNNA2                        | CX987143                    |
| ADAL        | CPT1A                        | CAFA-T2R67                    | DARS                          | DMGDH                       |
| ADRA2A      | CRAT                         | CALB1                         | DDX39B                        | DOK5                        |
| ADRA2B      | DARS                         | CLDN9                         | DLA-12                        | EFCAB11                     |
| ADSL        | DNM1                         | CLSTN2                        | DLA-64                        | ENO1                        |
| AGO1        | FGF4                         | COL17A1                       | DLA88                         | FOXP1                       |
| AGO3        | FNIP2                        | COMT                          | DLA-DMB                       | <b>GCNT2</b>                |
| AHDC1       | HPS3                         | cOR10A3                       | DLA-DQA1                      | GLP1R                       |
| AHSA2       | HPS5                         | cOR10A9                       | DLA-DQB1                      | GRID1                       |
| AIDA        | IGF1R                        | cOR10AB2                      | DLA-DRA                       | Hbs11                       |
| AIG1        | KIT                          | cOR1P2                        | FGF4                          | INTS10                      |
| AKAP8       | LEPR                         | cOR5E1P                       | HLA-DRB1                      | KANK4                       |
| AKAP8L      | NAV2                         | CSDA                          | HPS5                          | KCNK5                       |
| AKR7A2P1    | NPYR1                        | CTNNA2                        | LY6G5C                        | Lactb11                     |
| AL122050    | PPFIBP2                      | DDX39B                        | NEO1                          | NAALAD2                     |
| ALAS1       | RPTOR                        | DLA12                         | OR01E11                       | NR4A2                       |
| ALG9        | RSPO2                        | DLA64                         | OR08H10                       | PDGFA                       |
| ALMS1       | SCD5                         | DLA88                         | OR3A2                         | PRELID2                     |
| AMBRA1      | SGIP1                        | DLA-DMB                       | PDE6D                         | SETD4                       |
| AMPH        | SLC5A1                       | DLA-DQA1                      | PSMB8                         | SH3RF1                      |
| AMY1A       | SPRCS3                       | DLA-DQB1                      | SCD5                          | THBS1                       |
| AMY1B       | <b>TK2</b>                   | DLA-DRA                       | SGIP1                         | TXNL1                       |
| AMY1C       | TRPV1                        | DLG2                          | TNF                           | URI1                        |
| AMY2A       | <b>TRPV3</b>                 | DSC1                          | TPH1                          | ZCWPW1                      |
| AMY2B       | ZFR                          | DSG1                          | TRPV1                         | ZMAT4                       |
| ANAPC10     |                              | DSG3                          | <b>TRPV3</b>                  |                             |
| ANK2        |                              | FGD4                          |                               |                             |
| ANKRD30A    |                              | HLA-DRB1                      |                               |                             |
| ANKRD30B    |                              | HSF4                          |                               |                             |
| ANKRD32     |                              | HTR2A                         |                               |                             |
| ANKRD55     |                              | IL10                          |                               |                             |
| ANO10       |                              | IL13                          |                               |                             |
| <b>ANO3</b> |                              | IL4                           |                               |                             |
| ANXA2       |                              | IL5                           |                               |                             |
| ARHGAP1     |                              | ITGB2                         |                               |                             |
| ARHGAP15    |                              | LY6G5C                        |                               |                             |
| ARID1A      |                              | NEO1                          |                               |                             |
| ARSL        |                              | OLFM2                         |                               |                             |
| ASAP2       |                              | OR01E11                       |                               |                             |
| ASIC2       |                              | OR08C06                       |                               |                             |
| ASTL        |                              | OR08H09                       |                               |                             |
| ATG10       |                              | OR08H10                       |                               |                             |
| ATG13       |                              | OR10A4                        |                               |                             |
| ATP1A3      |                              | OR10B10                       |                               |                             |
| ATXN10      |                              | OR10F05                       |                               |                             |
| B2M         |                              | OR2D3                         |                               |                             |
| BAG4        |                              | OR3A2                         |                               |                             |
| BAI3        |                              | OR4B06                        |                               |                             |
| BAP1        |                              | OR7G2                         |                               |                             |
| BBIP1       |                              | PDE6B                         |                               |                             |

| <b>AMH</b> | <b>Stronen et al. T2 [3]</b> | <b>Stronen et al. TS3 [0]</b> | <b>Stronen et al. TS5 [1]</b> | <b>Pilot et al. TS4 [1]</b> |
|------------|------------------------------|-------------------------------|-------------------------------|-----------------------------|
| BCAP29     |                              | PDE6D                         |                               |                             |
| BCAR3      |                              | PEBP1                         |                               |                             |
| BCL2       |                              | PSMB8                         |                               |                             |
| BEAN1      |                              | SAG                           |                               |                             |
| BIRC2      |                              | TAS2R42                       |                               |                             |
| BMS1       |                              | TASR10                        |                               |                             |
| BRAF       |                              | TASR42                        |                               |                             |
| BRD4       |                              | TASR7                         |                               |                             |
| BROX       |                              | TNF                           |                               |                             |
| BZRAP1     |                              | TPH1                          |                               |                             |
| C11orf1    |                              | ULK1                          |                               |                             |
| C11orf80   |                              | USH2A                         |                               |                             |
| C16orf87   |                              | YWHAH                         |                               |                             |
| C17orf47   |                              |                               |                               |                             |
| C18orf42   |                              |                               |                               |                             |
| C19orf44   |                              |                               |                               |                             |
| C1orf112   |                              |                               |                               |                             |
| C1orf172   |                              |                               |                               |                             |
| C1orf190   |                              |                               |                               |                             |
| C1QTNF5    |                              |                               |                               |                             |
| C2orf47    |                              |                               |                               |                             |
| C2orf69    |                              |                               |                               |                             |
| C2orf78    |                              |                               |                               |                             |
| C3orf18    |                              |                               |                               |                             |
| C3orf35    |                              |                               |                               |                             |
| CACNA1D    |                              |                               |                               |                             |
| CACNA2D1   |                              |                               |                               |                             |
| CACNA2D2   |                              |                               |                               |                             |
| CADPS      |                              |                               |                               |                             |
| CADPS2     |                              |                               |                               |                             |
| CALN1      |                              |                               |                               |                             |
| CALR3      |                              |                               |                               |                             |
| CAMK1G     |                              |                               |                               |                             |
| CAPN3      |                              |                               |                               |                             |
| CAPN5      |                              |                               |                               |                             |
| CAPS       |                              |                               |                               |                             |
| CASC4      |                              |                               |                               |                             |
| CASP16P    |                              |                               |                               |                             |
| CATSPER2   |                              |                               |                               |                             |
| CBL        |                              |                               |                               |                             |
| CBLL1      |                              |                               |                               |                             |
| CBLN4      |                              |                               |                               |                             |
| CCDC153    |                              |                               |                               |                             |
| CCDC188    |                              |                               |                               |                             |
| CCDC192    |                              |                               |                               |                             |
| CCDC53     |                              |                               |                               |                             |
| CCNDBP1    |                              |                               |                               |                             |
| CCNH       |                              |                               |                               |                             |
| CCNJL      |                              |                               |                               |                             |
| CCNO       |                              |                               |                               |                             |
| CCT7       |                              |                               |                               |                             |
| CD164L2    |                              |                               |                               |                             |
| CDAN1      |                              |                               |                               |                             |
| CDC20B     |                              |                               |                               |                             |
| CDC27      |                              |                               |                               |                             |
| CDC42EP3   |                              |                               |                               |                             |
| CDH10      |                              |                               |                               |                             |
| CEBPD      |                              |                               |                               |                             |
| CELF4      |                              |                               |                               |                             |
| CEP41      |                              |                               |                               |                             |
| CEP57L1    |                              |                               |                               |                             |
| CHERP      |                              |                               |                               |                             |
| CHODL      |                              |                               |                               |                             |
| CHRM4      |                              |                               |                               |                             |

| <b>AMH</b> | <b>Stronen et al. T2 [3]</b> | <b>Stronen et al. TS3 [0]</b> | <b>Stronen et al. TS5 [1]</b> | <b>Pilot et al. TS4 [1]</b> |
|------------|------------------------------|-------------------------------|-------------------------------|-----------------------------|
| CISH       |                              |                               |                               |                             |
| CKLF       |                              |                               |                               |                             |
| CKMT1A     |                              |                               |                               |                             |
| CKMT1B     |                              |                               |                               |                             |
| CLASP2     |                              |                               |                               |                             |
| CLDN10     |                              |                               |                               |                             |
| CLSTN1     |                              |                               |                               |                             |
| CMTM1      |                              |                               |                               |                             |
| CNGA3      |                              |                               |                               |                             |
| CNTNAP4    |                              |                               |                               |                             |
| COA5       |                              |                               |                               |                             |
| COG5       |                              |                               |                               |                             |
| COL11A1    |                              |                               |                               |                             |
| COQ10B     |                              |                               |                               |                             |
| CORO2B     |                              |                               |                               |                             |
| CR2        |                              |                               |                               |                             |
| CSGALNACT2 |                              |                               |                               |                             |
| CSMD2      |                              |                               |                               |                             |
| CSPG5      |                              |                               |                               |                             |
| CTDSPL2    |                              |                               |                               |                             |
| CTNBL1     |                              |                               |                               |                             |
| CTNND2     |                              |                               |                               |                             |
| CTPS       |                              |                               |                               |                             |
| CTXN3      |                              |                               |                               |                             |
| CXCL13     |                              |                               |                               |                             |
| CXCL3      |                              |                               |                               |                             |
| CYB561     |                              |                               |                               |                             |
| CYB561D2   |                              |                               |                               |                             |
| DAPP1      |                              |                               |                               |                             |
| DBIL5P2    |                              |                               |                               |                             |
| DDHD2      |                              |                               |                               |                             |
| DDX4       |                              |                               |                               |                             |
| DGCR8      |                              |                               |                               |                             |
| DGKZ       |                              |                               |                               |                             |
| DGUOK      |                              |                               |                               |                             |
| DHDDS      |                              |                               |                               |                             |
| DHRS12     |                              |                               |                               |                             |
| DHX29      |                              |                               |                               |                             |
| DLGAP1     |                              |                               |                               |                             |
| DNAH1      |                              |                               |                               |                             |
| DNAJA2     |                              |                               |                               |                             |
| DNAJB4     |                              |                               |                               |                             |
| DNAJC3     |                              |                               |                               |                             |
| DOCK3      |                              |                               |                               |                             |
| DPYSL5     |                              |                               |                               |                             |
| DRAM1      |                              |                               |                               |                             |
| DTNA       |                              |                               |                               |                             |
| DUS4L      |                              |                               |                               |                             |
| DUSP11     |                              |                               |                               |                             |
| DUSP7      |                              |                               |                               |                             |
| DYNC1H1    |                              |                               |                               |                             |
| DYSF       |                              |                               |                               |                             |
| DZIP1      |                              |                               |                               |                             |
| E2F6       |                              |                               |                               |                             |
| EFCC1      |                              |                               |                               |                             |
| EGR4       |                              |                               |                               |                             |
| EHBP1      |                              |                               |                               |                             |
| EIF3J      |                              |                               |                               |                             |
| ELAVL4     |                              |                               |                               |                             |
| ELL3       |                              |                               |                               |                             |
| ELN        |                              |                               |                               |                             |
| ELP6       |                              |                               |                               |                             |
| ENTHD1     |                              |                               |                               |                             |
| EPB42      |                              |                               |                               |                             |

**AMH***Stronen et al. T2 [3]**Stronen et al. TS3 [0]**Stronen et al. TS5 [1]**Pilot et al. TS4 [1]*

EPM2AIP1  
EPS15L1  
EPST1  
ERBB4  
ESCO1  
ESM1  
EXOC6B  
EXTL1  
FAAH  
FAF2  
FAHD2A  
FAM117A  
FAM150A  
FAM172A  
FAM177B  
FAM19A3  
FAM46B  
FAM49B  
FAM83F  
FAU  
FBXL19  
FBXO41  
FBXW7  
FCN3  
FDXACB1  
FERMT2  
FGF12  
FGF14  
FHL3  
FHOD3  
FIBCD1  
FKSG51  
FLJ35017  
FLJ39294  
FLJ45513  
FNBP1L  
FOXO1  
FRMD5  
FRMD8  
FSTL5  
FUBP1  
FUT5  
FXD4  
FZD3  
GABRB3  
GALNT10  
GALNT11  
GALNT2  
GALNTL5  
GANC  
GATA6  
GBP2  
GBP4  
GBP5  
GBP7  
GCNT2  
GDAP1  
GDF6  
GDPD1  
GGT7  
GINM1  
GK2  
GLI3  
GLT8D1

| <b>AMH</b> | <b><i>Stronen et al. T2 [3]</i></b> | <b><i>Stronen et al. TS3 [0]</i></b> | <b><i>Stronen et al. TS5 [1]</i></b> | <b><i>Pilot et al. TS4 [1]</i></b> |
|------------|-------------------------------------|--------------------------------------|--------------------------------------|------------------------------------|
| GLYCTK     |                                     |                                      |                                      |                                    |
| GNAI2      |                                     |                                      |                                      |                                    |
| GNAT1      |                                     |                                      |                                      |                                    |
| GNL3       |                                     |                                      |                                      |                                    |
| GOLGA4     |                                     |                                      |                                      |                                    |
| GP9        |                                     |                                      |                                      |                                    |
| GPAT2      |                                     |                                      |                                      |                                    |
| GPATCH3    |                                     |                                      |                                      |                                    |
| GPM6A      |                                     |                                      |                                      |                                    |
| GPN2       |                                     |                                      |                                      |                                    |
| GPR22      |                                     |                                      |                                      |                                    |
| GPR3       |                                     |                                      |                                      |                                    |
| GPR39      |                                     |                                      |                                      |                                    |
| GPR62      |                                     |                                      |                                      |                                    |
| GPT2       |                                     |                                      |                                      |                                    |
| GPX8       |                                     |                                      |                                      |                                    |
| GRAP2      |                                     |                                      |                                      |                                    |
| GREB1L     |                                     |                                      |                                      |                                    |
| GRIA1      |                                     |                                      |                                      |                                    |
| GRID2      |                                     |                                      |                                      |                                    |
| GRIK3      |                                     |                                      |                                      |                                    |
| GRIK5      |                                     |                                      |                                      |                                    |
| GRM2       |                                     |                                      |                                      |                                    |
| GRM3       |                                     |                                      |                                      |                                    |
| GTDC1      |                                     |                                      |                                      |                                    |
| GTF3C5     |                                     |                                      |                                      |                                    |
| GYPA       |                                     |                                      |                                      |                                    |
| GYPB       |                                     |                                      |                                      |                                    |
| GZMA       |                                     |                                      |                                      |                                    |
| GZMK       |                                     |                                      |                                      |                                    |
| HARBI1     |                                     |                                      |                                      |                                    |
| HAUS2      |                                     |                                      |                                      |                                    |
| HBP1       |                                     |                                      |                                      |                                    |
| HEG1       |                                     |                                      |                                      |                                    |
| HEMK1      |                                     |                                      |                                      |                                    |
| HERC5      |                                     |                                      |                                      |                                    |
| HHIP       |                                     |                                      |                                      |                                    |
| HIVEP2     |                                     |                                      |                                      |                                    |
| HMGB3P1    |                                     |                                      |                                      |                                    |
| HMG2       |                                     |                                      |                                      |                                    |
| HNRNPF     |                                     |                                      |                                      |                                    |
| HRASLS2    |                                     |                                      |                                      |                                    |
| HS6ST3     |                                     |                                      |                                      |                                    |
| HSD3B7     |                                     |                                      |                                      |                                    |
| HSDL2      |                                     |                                      |                                      |                                    |
| HSF5       |                                     |                                      |                                      |                                    |
| HSPD1      |                                     |                                      |                                      |                                    |
| HSPE1      |                                     |                                      |                                      |                                    |
| HTR1E      |                                     |                                      |                                      |                                    |
| HYAL1      |                                     |                                      |                                      |                                    |
| HYAL2      |                                     |                                      |                                      |                                    |
| HYAL3      |                                     |                                      |                                      |                                    |
| IFRD2      |                                     |                                      |                                      |                                    |
| IGF1       |                                     |                                      |                                      |                                    |
| IGFL2      |                                     |                                      |                                      |                                    |
| IGFL3      |                                     |                                      |                                      |                                    |
| IGFL4      |                                     |                                      |                                      |                                    |
| IL31RA     |                                     |                                      |                                      |                                    |
| IL6ST      |                                     |                                      |                                      |                                    |
| IL7        |                                     |                                      |                                      |                                    |
| INA        |                                     |                                      |                                      |                                    |
| INPP4A     |                                     |                                      |                                      |                                    |
| INPP5F     |                                     |                                      |                                      |                                    |
| IQCF1      |                                     |                                      |                                      |                                    |

| <b>AMH</b> | <b>Stronen et al. T2 [3]</b> | <b>Stronen et al. TS3 [0]</b> | <b>Stronen et al. TS5 [1]</b> | <b>Pilot et al. TS4 [1]</b> |
|------------|------------------------------|-------------------------------|-------------------------------|-----------------------------|
| IQCF2      |                              |                               |                               |                             |
| IQCF3      |                              |                               |                               |                             |
| IQCF5      |                              |                               |                               |                             |
| IQCF6      |                              |                               |                               |                             |
| ITFG1      |                              |                               |                               |                             |
| ITGA9      |                              |                               |                               |                             |
| ITIH1      |                              |                               |                               |                             |
| ITIH3      |                              |                               |                               |                             |
| ITIH4      |                              |                               |                               |                             |
| JMJD6      |                              |                               |                               |                             |
| KAT7       |                              |                               |                               |                             |
| KATNA1     |                              |                               |                               |                             |
| KCNA4      |                              |                               |                               |                             |
| KCND2      |                              |                               |                               |                             |
| KCNH7      |                              |                               |                               |                             |
| KCNIP3     |                              |                               |                               |                             |
| KCNJ3      |                              |                               |                               |                             |
| KIAA0825   |                              |                               |                               |                             |
| KIAA1143   |                              |                               |                               |                             |
| KIAA1841   |                              |                               |                               |                             |
| KIAA1958   |                              |                               |                               |                             |
| KIF15      |                              |                               |                               |                             |
| KIF18A     |                              |                               |                               |                             |
| KIFAP3     |                              |                               |                               |                             |
| KLF2       |                              |                               |                               |                             |
| KLHL18     |                              |                               |                               |                             |
| KMT2C      |                              |                               |                               |                             |
| LARGE1     |                              |                               |                               |                             |
| LCMT2      |                              |                               |                               |                             |
| LDHD       |                              |                               |                               |                             |
| LEMD3      |                              |                               |                               |                             |
| LGALS1     |                              |                               |                               |                             |
| LIMK1      |                              |                               |                               |                             |
| LIN28A     |                              |                               |                               |                             |
| LOH11CR11  |                              |                               |                               |                             |
| LPHN3      |                              |                               |                               |                             |
| LRFN4      |                              |                               |                               |                             |
| LRIG2      |                              |                               |                               |                             |
| LRP1B      |                              |                               |                               |                             |
| LRRC41     |                              |                               |                               |                             |
| LRRC57     |                              |                               |                               |                             |
| LRRFIP2    |                              |                               |                               |                             |
| LSM1       |                              |                               |                               |                             |
| LSMEM2     |                              |                               |                               |                             |
| LSR7       |                              |                               |                               |                             |
| LYST       |                              |                               |                               |                             |
| MAGI2      |                              |                               |                               |                             |
| MAL        |                              |                               |                               |                             |
| MANF       |                              |                               |                               |                             |
| MAP1A      |                              |                               |                               |                             |
| MAP2       |                              |                               |                               |                             |
| MAP3K6     |                              |                               |                               |                             |
| MAP7       |                              |                               |                               |                             |
| MAPKAPK3   |                              |                               |                               |                             |
| MATR3      |                              |                               |                               |                             |
| MCAM       |                              |                               |                               |                             |
| MCHR1      |                              |                               |                               |                             |
| MCIDAS     |                              |                               |                               |                             |
| MCM4       |                              |                               |                               |                             |
| MCMBP      |                              |                               |                               |                             |
| MCTP1      |                              |                               |                               |                             |
| MDH1       |                              |                               |                               |                             |
| MDK        |                              |                               |                               |                             |
| MDM1       |                              |                               |                               |                             |

| <b>AMH</b> | <b>Stronen et al. T2 [3]</b> | <b>Stronen et al. TS3 [0]</b> | <b>Stronen et al. TS5 [1]</b> | <b>Pilot et al. TS4 [1]</b> |
|------------|------------------------------|-------------------------------|-------------------------------|-----------------------------|
| MED26      |                              |                               |                               |                             |
| MEGF10     |                              |                               |                               |                             |
| METTLL15   |                              |                               |                               |                             |
| METTLL23   |                              |                               |                               |                             |
| MFAP1      |                              |                               |                               |                             |
| MFRP       |                              |                               |                               |                             |
| MFSD11     |                              |                               |                               |                             |
| MGAT4A     |                              |                               |                               |                             |
| MIB1       |                              |                               |                               |                             |
| MIGA1      |                              |                               |                               |                             |
| MKL1       |                              |                               |                               |                             |
| MKLN1      |                              |                               |                               |                             |
| MLH1       |                              |                               |                               |                             |
| MMP9       |                              |                               |                               |                             |
| MOB4       |                              |                               |                               |                             |
| MPND       |                              |                               |                               |                             |
| MRPL49     |                              |                               |                               |                             |
| MRPS5      |                              |                               |                               |                             |
| MTMR4      |                              |                               |                               |                             |
| MTRNR2L7   |                              |                               |                               |                             |
| MUSTN1     |                              |                               |                               |                             |
| MYH3       |                              |                               |                               |                             |
| MYHAS      |                              |                               |                               |                             |
| MYL4       |                              |                               |                               |                             |
| MYLK3      |                              |                               |                               |                             |
| NADK2      |                              |                               |                               |                             |
| NAT6       |                              |                               |                               |                             |
| NAT8       |                              |                               |                               |                             |
| NAV3       |                              |                               |                               |                             |
| NCOA5      |                              |                               |                               |                             |
| NCOA6      |                              |                               |                               |                             |
| NDUFA11    |                              |                               |                               |                             |
| NEAT1      |                              |                               |                               |                             |
| NEB        |                              |                               |                               |                             |
| NEDD1      |                              |                               |                               |                             |
| NEK4       |                              |                               |                               |                             |
| NETO2      |                              |                               |                               |                             |
| NEXN       |                              |                               |                               |                             |
| NFG3       |                              |                               |                               |                             |
| NISCH      |                              |                               |                               |                             |
| NLK        |                              |                               |                               |                             |
| NLRX1      |                              |                               |                               |                             |
| NMUR2      |                              |                               |                               |                             |
| NOTO       |                              |                               |                               |                             |
| NPRL2      |                              |                               |                               |                             |
| NR0B2      |                              |                               |                               |                             |
| NR2F1      |                              |                               |                               |                             |
| NT5DC2     |                              |                               |                               |                             |
| NTM        |                              |                               |                               |                             |
| NTRK2      |                              |                               |                               |                             |
| NUDC       |                              |                               |                               |                             |
| NUFIP1     |                              |                               |                               |                             |
| NUP37      |                              |                               |                               |                             |
| NWD1       |                              |                               |                               |                             |
| NWD2       |                              |                               |                               |                             |
| NXPH1      |                              |                               |                               |                             |
| NYAP2      |                              |                               |                               |                             |
| ORAI3      |                              |                               |                               |                             |
| OTUD4      |                              |                               |                               |                             |
| OTX1       |                              |                               |                               |                             |
| PACSL1     |                              |                               |                               |                             |
| PAIP2      |                              |                               |                               |                             |
| PARP3      |                              |                               |                               |                             |
| PARPBP     |                              |                               |                               |                             |

| <b>AMH</b> | <b>Stronen et al. T2 [3]</b> | <b>Stronen et al. TS3 [0]</b> | <b>Stronen et al. TS5 [1]</b> | <b>Pilot et al. TS4 [1]</b> |
|------------|------------------------------|-------------------------------|-------------------------------|-----------------------------|
| PATL2      |                              |                               |                               |                             |
| PBRM1      |                              |                               |                               |                             |
| PC         |                              |                               |                               |                             |
| PCBP4      |                              |                               |                               |                             |
| PCCB       |                              |                               |                               |                             |
| PCDH17     |                              |                               |                               |                             |
| PCDH9      |                              |                               |                               |                             |
| PCGF6      |                              |                               |                               |                             |
| PCNX       |                              |                               |                               |                             |
| PDCD4      |                              |                               |                               |                             |
| PDE4B      |                              |                               |                               |                             |
| PDIA3      |                              |                               |                               |                             |
| PDZD2      |                              |                               |                               |                             |
| PDZD3      |                              |                               |                               |                             |
| PELI1      |                              |                               |                               |                             |
| PEX13      |                              |                               |                               |                             |
| PHACTR1    |                              |                               |                               |                             |
| PHF7       |                              |                               |                               |                             |
| PHKB       |                              |                               |                               |                             |
| PIGV       |                              |                               |                               |                             |
| PIK3CG     |                              |                               |                               |                             |
| PLA2G16    |                              |                               |                               |                             |
| PLA2G4D    |                              |                               |                               |                             |
| PLA2G4E    |                              |                               |                               |                             |
| PLA2GDF    |                              |                               |                               |                             |
| PLAC8L1    |                              |                               |                               |                             |
| PLXDC2     |                              |                               |                               |                             |
| PMCH       |                              |                               |                               |                             |
| POC1A      |                              |                               |                               |                             |
| PODXL      |                              |                               |                               |                             |
| POMGNT1    |                              |                               |                               |                             |
| POTEC      |                              |                               |                               |                             |
| POU2F2     |                              |                               |                               |                             |
| POU3F1     |                              |                               |                               |                             |
| POU5F2     |                              |                               |                               |                             |
| PPAP2A     |                              |                               |                               |                             |
| PPAPDC1A   |                              |                               |                               |                             |
| PPAPDC1B   |                              |                               |                               |                             |
| PPIL4      |                              |                               |                               |                             |
| PPIP5K1    |                              |                               |                               |                             |
| PPM1E      |                              |                               |                               |                             |
| PPM1M      |                              |                               |                               |                             |
| PPP2R1B    |                              |                               |                               |                             |
| PRADC1     |                              |                               |                               |                             |
| PRDM10     |                              |                               |                               |                             |
| PRDM2      |                              |                               |                               |                             |
| PRKAR2B    |                              |                               |                               |                             |
| PRKCD      |                              |                               |                               |                             |
| PRKDC      |                              |                               |                               |                             |
| PROM2      |                              |                               |                               |                             |
| PRR11      |                              |                               |                               |                             |
| PSTPIP2    |                              |                               |                               |                             |
| PTPN23     |                              |                               |                               |                             |
| PTPRD      |                              |                               |                               |                             |
| PUS10      |                              |                               |                               |                             |
| PVRL3      |                              |                               |                               |                             |
| QSER1      |                              |                               |                               |                             |
| RAB11FIP5  |                              |                               |                               |                             |
| RAB28      |                              |                               |                               |                             |
| RABAC1     |                              |                               |                               |                             |
| RAD51C     |                              |                               |                               |                             |
| RAD54L     |                              |                               |                               |                             |
| RAD54L2    |                              |                               |                               |                             |
| RANBP1     |                              |                               |                               |                             |



| <b>AMH</b>  | <b>Stronen et al. T2 [3]</b> | <b>Stronen et al. TS3 [0]</b> | <b>Stronen et al. TS5 [1]</b> | <b>Pilot et al. TS4 [1]</b> |
|-------------|------------------------------|-------------------------------|-------------------------------|-----------------------------|
| RANBP3      |                              |                               |                               |                             |
| RARRES3     |                              |                               |                               |                             |
| RASA1       |                              |                               |                               |                             |
| RASGEF1A    |                              |                               |                               |                             |
| RASSF1      |                              |                               |                               |                             |
| RASSF3      |                              |                               |                               |                             |
| RB1CC1      |                              |                               |                               |                             |
| RBFOX2      |                              |                               |                               |                             |
| RBL1        |                              |                               |                               |                             |
| RBM14       |                              |                               |                               |                             |
| RBM15B      |                              |                               |                               |                             |
| RBM4        |                              |                               |                               |                             |
| RBM4B       |                              |                               |                               |                             |
| RBSG3       |                              |                               |                               |                             |
| RCE1        |                              |                               |                               |                             |
| REL         |                              |                               |                               |                             |
| RET         |                              |                               |                               |                             |
| RFT1        |                              |                               |                               |                             |
| RFTN2       |                              |                               |                               |                             |
| RGS6        |                              |                               |                               |                             |
| RIF1        |                              |                               |                               |                             |
| RNF133      |                              |                               |                               |                             |
| RNF148      |                              |                               |                               |                             |
| RNF220      |                              |                               |                               |                             |
| RNF26       |                              |                               |                               |                             |
| RNF43       |                              |                               |                               |                             |
| RNF44       |                              |                               |                               |                             |
| RNPC3       |                              |                               |                               |                             |
| ROBO2       |                              |                               |                               |                             |
| ROCK1       |                              |                               |                               |                             |
| RPL13AP6    |                              |                               |                               |                             |
| RPL29       |                              |                               |                               |                             |
| RPS18P9     |                              |                               |                               |                             |
| RPS6KA1     |                              |                               |                               |                             |
| RRP9        |                              |                               |                               |                             |
| RSPO3       |                              |                               |                               |                             |
| SAMHD1      |                              |                               |                               |                             |
| SCAP        |                              |                               |                               |                             |
| SCMH1       |                              |                               |                               |                             |
| SCYL3       |                              |                               |                               |                             |
| SEC23IP     |                              |                               |                               |                             |
| SEC24D      |                              |                               |                               |                             |
| SEMA3F      |                              |                               |                               |                             |
| SEMA3G      |                              |                               |                               |                             |
| SEMA6D      |                              |                               |                               |                             |
| SEPT4       |                              |                               |                               |                             |
| SERF2       |                              |                               |                               |                             |
| SERINC4HYPK |                              |                               |                               |                             |
| SESN1       |                              |                               |                               |                             |
| SETD1A      |                              |                               |                               |                             |
| SF3A3       |                              |                               |                               |                             |
| SF3B1       |                              |                               |                               |                             |
| SFMBT1      |                              |                               |                               |                             |
| SFXN5       |                              |                               |                               |                             |
| SGMS2       |                              |                               |                               |                             |
| SGSM3       |                              |                               |                               |                             |
| SH3GL1      |                              |                               |                               |                             |
| SH3RF2      |                              |                               |                               |                             |
| SHOC2       |                              |                               |                               |                             |
| SIK2        |                              |                               |                               |                             |
| SIN3B       |                              |                               |                               |                             |
| SIPA1L1     |                              |                               |                               |                             |
| SKA2        |                              |                               |                               |                             |
| SKIV2L2     |                              |                               |                               |                             |

| <b>AMH</b> | <b>Stronen et al. T2 [3]</b> | <b>Stronen et al. TS3 [0]</b> | <b>Stronen et al. TS5 [1]</b> | <b>Pilot et al. TS4 [1]</b> |
|------------|------------------------------|-------------------------------|-------------------------------|-----------------------------|
| SKP2       |                              |                               |                               |                             |
| SLC12A5    |                              |                               |                               |                             |
| SLC16A1    |                              |                               |                               |                             |
| SLC1A1     |                              |                               |                               |                             |
| SLC25A17   |                              |                               |                               |                             |
| SLC26A3    |                              |                               |                               |                             |
| SLC26A4    |                              |                               |                               |                             |
| SLC2A5     |                              |                               |                               |                             |
| SLC30A2    |                              |                               |                               |                             |
| SLC35B1    |                              |                               |                               |                             |
| SLC35E1    |                              |                               |                               |                             |
| SLC38A9    |                              |                               |                               |                             |
| SLC4A10    |                              |                               |                               |                             |
| SLC4A4     |                              |                               |                               |                             |
| SLC9A1     |                              |                               |                               |                             |
| SLFNL1     |                              |                               |                               |                             |
| SLIT2      |                              |                               |                               |                             |
| SLITRK1    |                              |                               |                               |                             |
| SLITRK3    |                              |                               |                               |                             |
| SMAD1      |                              |                               |                               |                             |
| SMAD9      |                              |                               |                               |                             |
| SMG8       |                              |                               |                               |                             |
| SMIM4      |                              |                               |                               |                             |
| SMIM7      |                              |                               |                               |                             |
| SMYD5      |                              |                               |                               |                             |
| SNAI2      |                              |                               |                               |                             |
| SNAP23     |                              |                               |                               |                             |
| SNF        |                              |                               |                               |                             |
| SNHG4      |                              |                               |                               |                             |
| SNRPD1     |                              |                               |                               |                             |
| SORCS1     |                              |                               |                               |                             |
| SORCS2     |                              |                               |                               |                             |
| SORCS3     |                              |                               |                               |                             |
| SPATS2L    |                              |                               |                               |                             |
| SPCS1      |                              |                               |                               |                             |
| SPG11      |                              |                               |                               |                             |
| SPIDR      |                              |                               |                               |                             |
| SPOP       |                              |                               |                               |                             |
| SPTBN2     |                              |                               |                               |                             |
| SRSF2      |                              |                               |                               |                             |
| ST7        |                              |                               |                               |                             |
| STAB1      |                              |                               |                               |                             |
| STAC       |                              |                               |                               |                             |
| STAG1      |                              |                               |                               |                             |
| STAMBP     |                              |                               |                               |                             |
| STARD9     |                              |                               |                               |                             |
| STK3       |                              |                               |                               |                             |
| STMN2      |                              |                               |                               |                             |
| STRC       |                              |                               |                               |                             |
| STX1A      |                              |                               |                               |                             |
| STX1B      |                              |                               |                               |                             |
| SUPT4H1    |                              |                               |                               |                             |
| SYNPO2     |                              |                               |                               |                             |
| SYT1       |                              |                               |                               |                             |
| SYT6       |                              |                               |                               |                             |
| SYTL1      |                              |                               |                               |                             |
| SYVN1      |                              |                               |                               |                             |
| TAC4       |                              |                               |                               |                             |
| TAF5       |                              |                               |                               |                             |
| TANC2      |                              |                               |                               |                             |
| TAS2R16    |                              |                               |                               |                             |
| TBC1D23    |                              |                               |                               |                             |
| TBX1       |                              |                               |                               |                             |
| TDRD3      |                              |                               |                               |                             |

**AMH***Stronen et al. T2 [3]**Stronen et al. TS3 [0]**Stronen et al. TS5 [1]**Pilot et al. TS4 [1]*

TDRD7

TEX14

TEX264

TFAP2D

TGM4

TGM5

TGM7

THSD7B

THTPA

TK2

TKT

TLE3

TLR9

TM7SF2

TMEM110

TMEM115

TMEM123

TMEM17

TMEM222

TMEM235

TMEM262

TMEM38A

TMEM42

TMEM62

TMEM87A

TMOD1

TNFRSF21

TNNC1

TNRC6B

TNS1

TP53BP1

TP53INP2

TPD52

TPRKB

TRANK1

TRIM37

TRIM43

TRIM69

TRIM71

TRMT2A

TRNP1

TTBK2

TTC6

TUBGCP4

TUSC2

TWF2

TYW5

U6

U7

UBE2V2

UBR1

UGGT2

UGP2

UGT8

UNC50

UQCRH

UQCRHL

USP33

USP34

USP54

UTP11

VAPA

VMAC

VOPP1

| <b>AMH</b> | <b>Stronen et al. T2 [3]</b> | <b>Stronen et al. TS3 [0]</b> | <b>Stronen et al. TS5 [1]</b> | <b>Pilot et al. TS4 [1]</b> |
|------------|------------------------------|-------------------------------|-------------------------------|-----------------------------|
| VPS39      |                              |                               |                               |                             |
| VPS51      |                              |                               |                               |                             |
| VPS54      |                              |                               |                               |                             |
| WASF2      |                              |                               |                               |                             |
| WBSCR22    |                              |                               |                               |                             |
| WDPCP      |                              |                               |                               |                             |
| WDR59      |                              |                               |                               |                             |
| WDR76      |                              |                               |                               |                             |
| WDR82      |                              |                               |                               |                             |
| WDTC1      |                              |                               |                               |                             |
| WHSC1L1    |                              |                               |                               |                             |
| WIZ        |                              |                               |                               |                             |
| XPO1       |                              |                               |                               |                             |
| ZBBX       |                              |                               |                               |                             |
| ZBTB20     |                              |                               |                               |                             |
| ZBTB34     |                              |                               |                               |                             |
| ZDHHC18    |                              |                               |                               |                             |
| ZDHHC8     |                              |                               |                               |                             |
| ZEB2       |                              |                               |                               |                             |
| ZFHX4      |                              |                               |                               |                             |
| ZFPL1      |                              |                               |                               |                             |
| ZIC4       |                              |                               |                               |                             |
| ZMYND10    |                              |                               |                               |                             |
| ZNF106     |                              |                               |                               |                             |
| ZNF197     |                              |                               |                               |                             |
| ZNF2       |                              |                               |                               |                             |
| ZNF205     |                              |                               |                               |                             |
| ZNF213     |                              |                               |                               |                             |
| ZNF248     |                              |                               |                               |                             |
| ZNF25      |                              |                               |                               |                             |
| ZNF33A     |                              |                               |                               |                             |
| ZNF33B     |                              |                               |                               |                             |
| ZNF35      |                              |                               |                               |                             |
| ZNF37A     |                              |                               |                               |                             |
| ZNF407     |                              |                               |                               |                             |
| ZNF501     |                              |                               |                               |                             |
| ZNF502     |                              |                               |                               |                             |
| ZNF514     |                              |                               |                               |                             |
| ZNF521     |                              |                               |                               |                             |
| ZNF574     |                              |                               |                               |                             |
| ZNF638     |                              |                               |                               |                             |
| ZNF852     |                              |                               |                               |                             |
| ZNHIT2     |                              |                               |                               |                             |
| ZNRF1      |                              |                               |                               |                             |
| ZSCAN29    |                              |                               |                               |                             |

## (B) Genes overlapping between AMH and non-domesticated bovine (wisent, European bison)

The overlap between each list and AMH is given in square brackets and overlapping genes are highlighted in pink.

### Sources:

Gautier et al. 2016

<https://academic.oup.com/mbe/article/33/11/2801/2271657/Deciphering-the-Wisent-Demographic-and-Adaptive>

Wang et al. 2017

<https://academic.oup.com/gigascience/article/3065124>

| AMH      | Gautier et al. TS3 [11] | Wang et al. 2017 (S14) [3] |
|----------|-------------------------|----------------------------|
| ABCE1    | 4833423E24Rik           | ABCB4                      |
| ABHD14A  | 4930503B20Rik           | ABCC4                      |
| ABHD14B  | ACADL                   | ASPG                       |
| ABHD3    | ACBD5                   | ATP1A3                     |
| ACE      | Ace3                    | ATP2B2                     |
| ACTG1P4  | ACSM1                   | BRSK2                      |
| ACTG2    | ADAM32                  | BRWD1                      |
| ACY1     | ADAT1                   | CASP8AP2                   |
| ADAL     | ADGRE3                  | CD97                       |
| ADRA2A   | ADH7                    | CDC42BPG                   |
| ADRA2B   | AGER                    | CELF4                      |
| ADSL     | AMHR2                   | CNTNAP1                    |
| AGO1     | ANGPTL3                 | COL1A1                     |
| AGO3     | ANKDD1B                 | DIAPH3                     |
| AHDC1    | ANKRD31                 | EHMT1                      |
| AHSA2    | ANKZF1                  | FOXP1                      |
| AIDA     | APLF                    | FZD8                       |
| AIG1     | APOBEC3A                | GNAS                       |
| AKAP8    | APOBEC3B                | HCN3                       |
| AKAP8L   | APOF                    | HOXA3                      |
| AKR7A2P1 | AQP8                    | HSPA4L                     |
| AL122050 | ARHGAP29                | KCNH6                      |
| ALAS1    | ARL13A                  | KCNK1                      |
| ALG9     | ARPC2                   | KLHL21                     |
| ALMS1    | AU018091                | LILRB3                     |
| AMBRA1   | BC026585                | LMNB2                      |
| AMPH     | BCKDHB                  | MAPK3K13                   |
| AMY1A    | BCO2                    | MAPK8IP3                   |
| AMY1B    | BLZF1                   | MAT2B                      |
| AMY1C    | BPHL                    | MUC20                      |
| AMY2A    | BRIP1                   | MYO5B                      |
| AMY2B    | BTBD8                   | NACC1                      |
| ANAPC10  | Btn1                    | NEFH                       |
| ANK2     | C12orf71                | NOS3                       |
| ANKRD30A | C14orf39                | OR11G2                     |
| ANKRD30B | C14orf79                | OR12D2                     |
| ANKRD32  | C17orf53                | PARPBP                     |
| ANKRD55  | C19orf57                | PDE6A                      |
| ANO10    | C1orf112                | PLIN4                      |
| ANO3     | C1orf158                | PTH1R                      |
| ANXA2    | C1orf87                 | PTK2B                      |
| ARHGAP1  | C2orf80                 | RADIL                      |
| ARHGAP15 | C4BPA                   | RANBP17                    |
| ARID1A   | C6orf141                | SEPT8                      |
| ARSJ     | C7orf50                 | SLC12A7                    |
| ASAP2    | C9orf43                 | SLC24A1                    |
| ASIC2    | C9orf50                 | SLC4A8                     |
| ASTL     | CCDC102B                | SMARCA2                    |
| ATG10    | CCDC154                 | SYNGAP1                    |
| ATG13    | CCDC185                 | TFE3                       |
| ATP1A3   | CCDC190                 | TOMM20                     |
| ATXN10   | CCDC30                  | TRAF3IP1                   |
| B2M      | CCDC57                  | UNC93B1                    |
| BAG4     | CCDC66                  | XP_001249346.4             |
| BAI3     | Ccdc71                  | XP_001249583.2             |
| BAP1     | CCDC78                  | XP_001251951.2             |
| BBIP1    | CCDC79                  | XP_001255218.2             |
| BCAP29   | CCDC82                  | XP_001255375.1             |
| BCAR3    | CCL16                   | XP_001255473.3             |
| BCL2     | CCL24                   | XP_003584089.2             |
| BEAN1    | CCL5                    | XP_005193688.1             |

| <i>AMH</i>      | <i>Gautier et al. TS3 [11]</i> | <i>Wang et al. 2017 (S14) [3]</i> |
|-----------------|--------------------------------|-----------------------------------|
| BIRC2           | CD180                          | XP_005195701.1                    |
| BMS1            | CD1E                           | XP_005195799.1                    |
| BRAF            | CD244                          | XP_005197067.1                    |
| BRD4            | CD4                            | XP_005197353.1                    |
| BROX            | CD44                           | XP_005198975.1                    |
| BZRAP1          | CD48                           | XP_588462.3                       |
| C11orf1         | CD55                           | XP_592549.4                       |
| C11orf80        | CD72                           | XP_594531.4                       |
| C16orf87        | CD9                            | XP_600867.4                       |
| C17orf47        | CDC25C                         | XP_869208.6                       |
| C18orf42        | CDCA4                          | ZNF526                            |
| C19orf44        | CDHR4                          |                                   |
| <b>C1orf112</b> | CDKN2A                         |                                   |
| C1orf172        | CEACAM18                       |                                   |
| C1orf190        | CENPQ                          |                                   |
| C1QTNF5         | CER1                           |                                   |
| C2orf47         | CFH                            |                                   |
| C2orf69         | CIDEC                          |                                   |
| C2orf78         | CKAP2L                         |                                   |
| C3orf18         | CLCA4                          |                                   |
| C3orf35         | CLDN15                         |                                   |
| CACNA1D         | CLDN25                         |                                   |
| CACNA2D1        | CLEC14A                        |                                   |
| CACNA2D2        | CLIC5                          |                                   |
| CADPS           | CMTM6                          |                                   |
| CADPS2          | CNGB1                          |                                   |
| CALN1           | CROT                           |                                   |
| CALR3           | CXCL16                         |                                   |
| CAMK1G          | Cyp2c44                        |                                   |
| CAPN3           | CYP4B1                         |                                   |
| CAPN5           | CYP4X1                         |                                   |
| CAPS            | DHRS4                          |                                   |
| CASC4           | DMRTB1                         |                                   |
| CASP16P         | DMRTC2                         |                                   |
| CATSPER2        | DNAJB1                         |                                   |
| CBL             | DNAJB7                         |                                   |
| CBLL1           | DNASE2B                        |                                   |
| CBLN4           | DPEP2                          |                                   |
| CCDC153         | DSC3                           |                                   |
| CCDC188         | DUSP12                         |                                   |
| CCDC192         | DYTN                           |                                   |
| CCDC53          | <b>DZIP1</b>                   |                                   |
| CCNDBP1         | ECH1                           |                                   |
| CCNH            | EFHB                           |                                   |
| CCNJL           | EGFL6                          |                                   |
| CCNO            | <b>ENTHD1</b>                  |                                   |
| CCT7            | Epb4.115                       |                                   |
| CD164L2         | EPS8L3                         |                                   |
| CDAN1           | ERCC6L2                        |                                   |
| CDC20B          | ERICH5                         |                                   |
| CDC27           | EVI2A                          |                                   |
| CDC42EP3        | EVI5                           |                                   |
| CDH10           | FAM111B                        |                                   |
| CEBPD           | FAM189A1                       |                                   |
| <b>CELF4</b>    | FAM204A                        |                                   |
| CEP41           | FAM3D                          |                                   |
| CEP57L1         | FAM64A                         |                                   |
| CHERP           | FANCE                          |                                   |
| CHODL           | FCAR                           |                                   |
| CHRM4           | FCRL1                          |                                   |
| CISH            | FCRL3                          |                                   |
| CKLF            | FCRL5                          |                                   |
| CKMT1A          | FCRLA                          |                                   |
| CKMT1B          | FETUB                          |                                   |
| CLASP2          | FGFBP1                         |                                   |
| CLDN10          | FMO5                           |                                   |
| CLSTN1          | FOXI1                          |                                   |

| <i>AMH</i>    | <i>Gautier et al. TS3 [11]</i> | <i>Wang et al. 2017 (S14) [3]</i> |
|---------------|--------------------------------|-----------------------------------|
| CMTM1         | FSCN3                          |                                   |
| CNGA3         | GCC1                           |                                   |
| CNTNAP4       | GGACT                          |                                   |
| COA5          | GHRL                           |                                   |
| COG5          | GIMAP7                         |                                   |
| COL11A1       | GIMAP8                         |                                   |
| COQ10B        | GINS4                          |                                   |
| CORO2B        | GJA10                          |                                   |
| CR2           | GLOD4                          |                                   |
| CSGALNACT2    | Gm10257                        |                                   |
| CSMD2         | Gm34653                        |                                   |
| CSPG5         | Gm766                          |                                   |
| CTDSPL2       | GPLD1                          |                                   |
| CTNBL1        | GPR50                          |                                   |
| CTNND2        | GPRIN2                         |                                   |
| CTPS          | Gramd1c                        |                                   |
| CTXN3         | GSDMC                          |                                   |
| CXCL13        | GSTA1                          |                                   |
| CXCL3         | GTF2F1                         |                                   |
| CYB561        | GZMB                           |                                   |
| CYB561D2      | HBD                            |                                   |
| DAPP1         | <b>HEMK1</b>                   |                                   |
| DBIL5P2       | HLA-B                          |                                   |
| DDHD2         | HLA-DMB                        |                                   |
| DDX4          | HPX                            |                                   |
| DGCR8         | HSD17B12                       |                                   |
| DGKZ          | HSD17B3                        |                                   |
| DGUOK         | HSD17B8                        |                                   |
| DHDS          | ICAM1                          |                                   |
| DHRS12        | Ifi27                          |                                   |
| DHX29         | IFI44                          |                                   |
| DLGAP1        | IFNA16                         |                                   |
| DNAH1         | IFNAR1                         |                                   |
| DNAJA2        | IGSF23                         |                                   |
| DNAJB4        | IL10RB                         |                                   |
| DNAJC3        | IQCC                           |                                   |
| DOCK3         | KDM7A                          |                                   |
| DPYSL5        | <b>KIAA0825</b>                |                                   |
| DRAM1         | <b>KIAA1143</b>                |                                   |
| DTNA          | KIAA1328                       |                                   |
| DUS4L         | KIAA1551                       |                                   |
| DUSP11        | KLF5                           |                                   |
| DUSP7         | KLHDC7B                        |                                   |
| DYNC1H1       | KLK15                          |                                   |
| DYSF          | Klra2                          |                                   |
| <b>DZIP1</b>  | KLRC1                          |                                   |
| E2F6          | KLRD1                          |                                   |
| EFCC1         | Klrk1                          |                                   |
| EGR4          | KPRP                           |                                   |
| EHBP1         | KRT32                          |                                   |
| EIF3J         | KRT74                          |                                   |
| ELAVL4        | KRT77                          |                                   |
| ELL3          | LAG3                           |                                   |
| ELN           | LCA5                           |                                   |
| ELP6          | Lcn3                           |                                   |
| <b>ENTHD1</b> | LCN8                           |                                   |
| EPB42         | LGALS14                        |                                   |
| EPM2AIP1      | LIPJ                           |                                   |
| EPS15L1       | LOC100359535                   |                                   |
| EPST11        | LOC100360601                   |                                   |
| ERBB4         | LRRC31                         |                                   |
| ESCO1         | LYPD8                          |                                   |
| ESM1          | MAGEB4                         |                                   |
| EXOC6B        | MALSU1                         |                                   |
| EXTL1         | MAP3K19                        |                                   |
| FAAH          | MAP7D1                         |                                   |
| FAF2          | MAVS                           |                                   |

| <i>AMH</i> | <i>Gautier et al. TS3 [11]</i> | <i>Wang et al. 2017 (S14) [3]</i> |
|------------|--------------------------------|-----------------------------------|
| FAHD2A     | MCHR2                          |                                   |
| FAM117A    | MCM10                          |                                   |
| FAM150A    | MDM1                           |                                   |
| FAM172A    | MFSD6L                         |                                   |
| FAM177B    | MICALCL                        |                                   |
| FAM19A3    | MOGAT3                         |                                   |
| FAM46B     | MRAP                           |                                   |
| FAM49B     | MRGPRD                         |                                   |
| FAM83F     | MROH8                          |                                   |
| FAU        | MRPL1                          |                                   |
| FBXL19     | MRPL16                         |                                   |
| FBXO41     | MRPS23                         |                                   |
| FBXW7      | MRPS30                         |                                   |
| FCN3       | MRPS35                         |                                   |
| FDXACB1    | MS4A3                          |                                   |
| FERMT2     | MSANTD1                        |                                   |
| FGF12      | MSRB2                          |                                   |
| FGF14      | MTG1                           |                                   |
| FHL3       | MUC15                          |                                   |
| FHOD3      | MYBPH                          |                                   |
| FIBCD1     | MYOC                           |                                   |
| FKSG51     | NAT8B                          |                                   |
| FLJ35017   | NCCRP1                         |                                   |
| FLJ39294   | NCOA1                          |                                   |
| FLJ45513   | NEIL3                          |                                   |
| FNBP1L     | NFE2L3                         |                                   |
| FOXO1      | NMRAL1                         |                                   |
| FRMD5      | NOL11                          |                                   |
| FRMD8      | NOL12                          |                                   |
| FSTL5      | NOX1                           |                                   |
| FUBP1      | NRIP2                          |                                   |
| FUT5       | NUCB1                          |                                   |
| FXYD4      | NUDT14                         |                                   |
| FZD3       | NUDT17                         |                                   |
| GABRB3     | NUPL2                          |                                   |
| GALNT10    | OCA2                           |                                   |
| GALNT11    | ODC1                           |                                   |
| GALNT2     | Olf1178                        |                                   |
| GALNTL5    | Olf1231                        |                                   |
| GANC       | Olf1280                        |                                   |
| GATA6      | Olf1353                        |                                   |
| GBP2       | Olf1358                        |                                   |
| GBP4       | Olf424                         |                                   |
| GBP5       | Olf49                          |                                   |
| GBP7       | Olf541                         |                                   |
| GCNT2      | Olf600                         |                                   |
| GDAP1      | Olf606                         |                                   |
| GDF6       | Olf610                         |                                   |
| GDPD1      | Olf711                         |                                   |
| GGT7       | Olf794                         |                                   |
| GINM1      | Olf867                         |                                   |
| GK2        | Olf905                         |                                   |
| GLI3       | Olf922                         |                                   |
| GLT8D1     | Olf963                         |                                   |
| GLYCTK     | Olr1158                        |                                   |
| GNAI2      | Olr508                         |                                   |
| GNAT1      | Olr837                         |                                   |
| GNL3       | Olr86                          |                                   |
| GOLGA4     | OR10AG1                        |                                   |
| GP9        | OR10J5                         |                                   |
| GPAT2      | OR10K1                         |                                   |
| GPATCH3    | OR10R2                         |                                   |
| GPM6A      | OR10V1                         |                                   |
| GPN2       | OR12D3                         |                                   |
| GPR22      | OR13F1                         |                                   |
| GPR3       | OR1E2                          |                                   |
| GPR39      | OR1J1                          |                                   |



| <i>AMH</i> | <i>Gautier et al. TS3 [11]</i> | <i>Wang et al. 2017 (S14) [3]</i> |
|------------|--------------------------------|-----------------------------------|
| GPR62      | OR1L3                          |                                   |
| GPT2       | OR1M1                          |                                   |
| GPX8       | OR2AG2                         |                                   |
| GRAP2      | OR2D2                          |                                   |
| GREB1L     | OR2T12                         |                                   |
| GRIA1      | OR4C12                         |                                   |
| GRID2      | OR4C46                         |                                   |
| GRIK3      | OR4F15                         |                                   |
| GRIK5      | OR4F6                          |                                   |
| GRM2       | OR4K14                         |                                   |
| GRM3       | OR51A7                         |                                   |
| GTDC1      | OR52E8                         |                                   |
| GTF3C5     | OR52H1                         |                                   |
| GYP A      | OR52R1                         |                                   |
| GYP B      | OR5C1                          |                                   |
| GZMA       | OR5M11                         |                                   |
| GZMK       | OR6K2                          |                                   |
| HARBI1     | OR6N2                          |                                   |
| HAUS2      | OR6Y1                          |                                   |
| HBP1       | OR7G3                          |                                   |
| HEG1       | OR8A1                          |                                   |
| HEMK1      | OR9K2                          |                                   |
| HERC5      | OVCH1                          |                                   |
| HHIP       | PALM3                          |                                   |
| HIVEP2     | PAOX                           |                                   |
| HMGB3P1    | PATL2                          |                                   |
| HMG N2     | PCED1B                         |                                   |
| HNRNPF     | PDCD2L                         |                                   |
| HRASLS2    | PDHX                           |                                   |
| HS6ST3     | PER2                           |                                   |
| HSD3B7     | Pga5                           |                                   |
| HSDL2      | PGLYRP1                        |                                   |
| HSF5       | PGLYRP2                        |                                   |
| HSPD1      | PI4K2B                         |                                   |
| HSPE1      | PIGV                           |                                   |
| HTR1E      | PKD2L1                         |                                   |
| HYAL1      | PLEKHO2                        |                                   |
| HYAL2      | PLG                            |                                   |
| HYAL3      | PLIN2                          |                                   |
| IFRD2      | PLLP                           |                                   |
| IGF1       | PMVK                           |                                   |
| IGFL2      | PNLIPRP3                       |                                   |
| IGFL3      | PNMA1                          |                                   |
| IGFL4      | PNMAL1                         |                                   |
| IL31RA     | POC5                           |                                   |
| IL6ST      | POLI                           |                                   |
| IL7        | POM121L2                       |                                   |
| INA        | POU2F1                         |                                   |
| INPP4A     | PPP1R15A                       |                                   |
| INPP5F     | PRR23A                         |                                   |
| IQCF1      | PRSS16                         |                                   |
| IQCF2      | PRSS53                         |                                   |
| IQCF3      | PSTK                           |                                   |
| IQCF5      | QRICH2                         |                                   |
| IQCF6      | RAD9B                          |                                   |
| ITFG1      | RANBP3L                        |                                   |
| ITGA9      | RDH16                          |                                   |
| ITIH1      | RGL3                           |                                   |
| ITIH3      | RHBDD3                         |                                   |
| ITIH4      | RIBC1                          |                                   |
| JMJD6      | RILP                           |                                   |
| KAT7       | RITA1                          |                                   |
| KATNA1     | RNF135                         |                                   |
| KCNA4      | RNF212B                        |                                   |
| KCND2      | RSPH4A                         |                                   |
| KCNH7      | RUFY4                          |                                   |
| KCNIP3     | SAMD15                         |                                   |

| <i>AMH</i> | <i>Gautier et al. TS3 [11]</i> | <i>Wang et al. 2017 (S14) [3]</i> |
|------------|--------------------------------|-----------------------------------|
| KCNJ3      | SAMD3                          |                                   |
| KIAA0825   | SAXO2                          |                                   |
| KIAA1143   | SCAND1                         |                                   |
| KIAA1841   | SCGB2A2                        |                                   |
| KIAA1958   | SCN7A                          |                                   |
| KIF15      | Sectm1b                        |                                   |
| KIF18A     | SEMA4G                         |                                   |
| KIFAP3     | 41883                          |                                   |
| KLF2       | SERPINB4                       |                                   |
| KLHL18     | SFTPC                          |                                   |
| KMT2C      | SFTPD                          |                                   |
| LARGE1     | SH2D6                          |                                   |
| LCMT2      | SHISA5                         |                                   |
| LDHD       | SIRPA                          |                                   |
| LEMD3      | SIRPB2                         |                                   |
| LGALS1     | SIX1                           |                                   |
| LIMK1      | Skint1                         |                                   |
| LIN28A     | SLC15A5                        |                                   |
| LOH11CR11  | SLC16A11                       |                                   |
| LPHN3      | SLC16A4                        |                                   |
| LRFN4      | SLC17A1                        |                                   |
| LRIG2      | SLC17A3                        |                                   |
| LRP1B      | SLC22A10                       |                                   |
| LRRC41     | SLC22A13                       |                                   |
| LRRC57     | SLC35F4                        |                                   |
| LRRFIP2    | SLC39A4                        |                                   |
| LSM1       | SMCO2                          |                                   |
| LSMEM2     | SNAPC2                         |                                   |
| LSR7       | SNTN                           |                                   |
| LYST       | SP4                            |                                   |
| MAGI2      | SPAG5                          |                                   |
| MAL        | SPAM1                          |                                   |
| MANF       | SPATA25                        |                                   |
| MAP1A      | SPHKAP                         |                                   |
| MAP2       | SPN                            |                                   |
| MAP3K6     | SPZ1                           |                                   |
| MAP7       | ST7L                           |                                   |
| MAPKAPK3   | STRA8                          |                                   |
| MATR3      | STXBP4                         |                                   |
| MCAM       | SUPT7L                         |                                   |
| MCHR1      | SYNE4                          |                                   |
| MCIDAS     | Taar7a                         |                                   |
| MCM4       | TARS2                          |                                   |
| MCMBP      | TAS1R1                         |                                   |
| MCTP1      | TAS2R16                        |                                   |
| MDH1       | TAS2R46                        |                                   |
| MDK        | TBL2                           |                                   |
| MDM1       | TEKT2                          |                                   |
| MED26      | TEX28                          |                                   |
| MEGF10     | TF                             |                                   |
| METTL15    | THEM4                          |                                   |
| METTL23    | THPO                           |                                   |
| MFAP1      | TIGD3                          |                                   |
| MFRP       | TKTL1                          |                                   |
| MFSD11     | TMC5                           |                                   |
| MGAT4A     | TMEM223                        |                                   |
| MIB1       | TMEM260                        |                                   |
| MIGA1      | TMEM86B                        |                                   |
| MKL1       | TMPRSS11D                      |                                   |
| MKLN1      | TNFSF9                         |                                   |
| MLH1       | TRIM40                         |                                   |
| MMP9       | TRIM64C                        |                                   |
| MOB4       | TRIM77                         |                                   |
| MPND       | Tstd3                          |                                   |
| MRPL49     | TTLL8                          |                                   |
| MRPS5      | UBL5                           |                                   |
| MTMR4      | UBQLNL                         |                                   |

| <b>AMH</b>    | <b>Gautier et al. TS3 [11]</b> | <b>Wang et al. 2017 (S14) [3]</b> |
|---------------|--------------------------------|-----------------------------------|
| MTRNR2L7      | UGT2B17                        |                                   |
| MUSTN1        | ULBP3                          |                                   |
| MYH3          | UPF3A                          |                                   |
| MYHAS         | UPP2                           |                                   |
| MYL4          | USHBP1                         |                                   |
| MYLK3         | USP16                          |                                   |
| NADK2         | USP45                          |                                   |
| NAT6          | VASP                           |                                   |
| NAT8          | VGLL1                          |                                   |
| NAV3          | VPS37C                         |                                   |
| NCOA5         | VPS72                          |                                   |
| NCOA6         | Wfdc3                          |                                   |
| NDUFA11       | WISP3                          |                                   |
| NEAT1         | XAF1                           |                                   |
| NEB           | ZBTB10                         |                                   |
| NEDD1         | Zcchc13                        |                                   |
| NEK4          | ZCCHC5                         |                                   |
| NETO2         | ZGPAT                          |                                   |
| NEXN          | ZNF239                         |                                   |
| NFG3          | ZNF584                         |                                   |
| NISCH         | ZNF599                         |                                   |
| NLK           | ZNF605                         |                                   |
| NLRX1         | ZNF622                         |                                   |
| NMUR2         | ZNF674                         |                                   |
| NOTO          | ZNF683                         |                                   |
| NPRL2         | <b>ZNHIT2</b>                  |                                   |
| NR0B2         | ZNHIT6                         |                                   |
| NR2F1         | ZP2                            |                                   |
| NT5DC2        | ZSCAN5B                        |                                   |
| NTM           |                                |                                   |
| NTRK2         |                                |                                   |
| NUDC          |                                |                                   |
| NUFIP1        |                                |                                   |
| NUP37         |                                |                                   |
| NWD1          |                                |                                   |
| NWD2          |                                |                                   |
| NXPH1         |                                |                                   |
| NYAP2         |                                |                                   |
| ORAI3         |                                |                                   |
| OTUD4         |                                |                                   |
| OTX1          |                                |                                   |
| PACSIN1       |                                |                                   |
| PAIP2         |                                |                                   |
| PARP3         |                                |                                   |
| <b>PARPBP</b> |                                |                                   |
| <b>PATL2</b>  |                                |                                   |
| PBRM1         |                                |                                   |
| PC            |                                |                                   |
| PCBP4         |                                |                                   |
| PCCB          |                                |                                   |
| PCDH17        |                                |                                   |
| PCDH9         |                                |                                   |
| PCGF6         |                                |                                   |
| PCNX          |                                |                                   |
| PDCD4         |                                |                                   |
| PDE4B         |                                |                                   |
| PDIA3         |                                |                                   |
| PDZD2         |                                |                                   |
| PDZD3         |                                |                                   |
| PEL1          |                                |                                   |
| PEX13         |                                |                                   |
| PHACTR1       |                                |                                   |
| PHF7          |                                |                                   |
| PHKB          |                                |                                   |
| <b>PIGV</b>   |                                |                                   |
| PIK3CG        |                                |                                   |
| PLA2G16       |                                |                                   |

**AMH**

*Gautier et al. TS3 [11]*      *Wang et al. 2017 (S14) [3]*

PLA2G4D  
PLA2G4E  
PLA2GDF  
PLAC8L1  
PLXDC2  
PMCH  
POC1A  
PODXL  
POMGNT1  
POTEC  
POU2F2  
POU3F1  
POU5F2  
PPAP2A  
PPAPDC1A  
PPAPDC1B  
PPIL4  
PPIP5K1  
PPM1E  
PPM1M  
PPP2R1B  
PRADC1  
PRDM10  
PRDM2  
PRKAR2B  
PRKCD  
PRKDC  
PROM2  
PRR11  
PSTPIP2  
PTPN23  
PTPRD  
PUS10  
PVRL3  
QSER1  
RAB11FIP5  
RAB28  
RABAC1  
RAD51C  
RAD54L  
RAD54L2  
RANBP1  
RANBP3  
RARRES3  
RASA1  
RASGEF1A  
RASSF1  
RASSF3  
RB1CC1  
RBFOX2  
RBL1  
RBM14  
RBM15B  
RBM4  
RBM4B  
RBSG3  
RCE1  
REL  
RET  
RFT1  
RFTN2  
RGS6  
RIF1  
RNF133  
RNF148  
RNF220  
RNF26

**AMH**

*Gautier et al. TS3 [11]*      *Wang et al. 2017 (S14) [3]*

RNF43  
RNF44  
RNPC3  
ROBO2  
ROCK1  
RPL13AP6  
RPL29  
RPS18P9  
RPS6KA1  
RRP9  
RSPO3  
SAMHD1  
SCAP  
SCMH1  
SCYL3  
SEC23IP  
SEC24D  
SEMA3F  
SEMA3G  
SEMA6D  
SEPT4  
SERF2  
SERINC4HYPK  
SESN1  
SETD1A  
SF3A3  
SF3B1  
SFMBT1  
SFXN5  
SGMS2  
SGSM3  
SH3GL1  
SH3RF2  
SHOC2  
SIK2  
SIN3B  
SIPA1L1  
SKA2  
SKIV2L2  
SKP2  
SLC12A5  
SLC16A1  
SLC1A1  
SLC25A17  
SLC26A3  
SLC26A4  
SLC2A5  
SLC30A2  
SLC35B1  
SLC35E1  
SLC38A9  
SLC4A10  
SLC4A4  
SLC9A1  
SLFNL1  
SLIT2  
SLITRK1  
SLITRK3  
SMAD1  
SMAD9  
SMG8  
SMIM4  
SMIM7  
SMYD5  
SNAI2  
SNAP23  
SNF

**AMH**

*Gautier et al. TS3 [11]*      *Wang et al. 2017 (S14) [3]*

SNHG4  
SNRPD1  
SORCS1  
SORCS2  
SORCS3  
SPATS2L  
SPCS1  
SPG11  
SPIDR  
SPOP  
SPTBN2  
SRSF2  
ST7  
STAB1  
STAC  
STAG1  
STAMBP  
STARD9  
STK3  
STMN2  
STRC  
STX1A  
STX1B  
SUPT4H1  
SYNPO2  
SYT1  
SYT6  
SYTL1  
SYVN1  
TAC4  
TAF5  
TANC2  
**TAS2R16**  
TBC1D23  
TBX1  
TDRD3  
TDRD7  
TEX14  
TEX264  
TFAP2D  
TGM4  
TGM5  
TGM7  
THSD7B  
THTPA  
TK2  
TKT  
TLE3  
TLR9  
TM7SF2  
TMEM110  
TMEM115  
TMEM123  
TMEM17  
TMEM222  
TMEM235  
TMEM262  
TMEM38A  
TMEM42  
TMEM62  
TMEM87A  
TMOD1  
TNFRSF21  
TNNC1  
TNRC6B  
TNS1  
TP53BP1

**AMH***Gautier et al. TS3 [11]      Wang et al. 2017 (S14) [3]*

TP53INP2  
TPD52  
TPRKB  
TRANK1  
TRIM37  
TRIM43  
TRIM69  
TRIM71  
TRMT2A  
TRNP1  
TTBK2  
TTC6  
TUBGCP4  
TUSC2  
TWF2  
TYW5  
U6  
U7  
UBE2V2  
UBR1  
UGGT2  
UGP2  
UGT8  
UNC50  
UQCRH  
UQCRHL  
USP33  
USP34  
USP54  
UTP11  
VAPA  
VMAC  
VOPP1  
VPS39  
VPS51  
VPS54  
WASF2  
WBSCR22  
WDPCP  
WDR59  
WDR76  
WDR82  
WDTC1  
WHSC1L1  
WIZ  
XPO1  
ZBBX  
ZBTB20  
ZBTB34  
ZDHHC18  
ZDHHC8  
ZEB2  
ZFHX4  
ZFPL1  
ZIC4  
ZMYND10  
ZNF106  
ZNF197  
ZNF2  
ZNF205  
ZNF213  
ZNF248  
ZNF25  
ZNF33A  
ZNF33B  
ZNF35  
ZNF37A

**AMH**

**Gautier et al. TS3 [11]**

**Wang et al. 2017 (S14) [3]**

ZNF407

ZNF501

ZNF502

ZNF514

ZNF521

ZNF574

ZNF638

ZNF852

ZNHIT2

ZNRF1

ZSCAN29



**(C) Results of hypergeometric intersection tests on data from S5 Table (A) and (B)**

|           | wild <i>Canis</i> (grey wolf)               |                                      |                                             |                                              | wild bovine (wisent)                           |                                              |
|-----------|---------------------------------------------|--------------------------------------|---------------------------------------------|----------------------------------------------|------------------------------------------------|----------------------------------------------|
|           | <i>Stronen et al. T2 [32]</i>               | <i>Stronen et al. TS3 [70]</i>       | <i>Stronen et al. TS5 [33]</i>              | <i>Pilot et al. TS4 [32]</i>                 | <i>Gautier et al. TS3 [425]</i>                | <i>Wang et al. S14 [72]</i>                  |
| AMH [742] | $a = 742, b = 32, v = 3;$<br>$p = 0.120816$ | $a = 742, b = 70, v = 0;$<br>$p = 1$ | $a = 742, b = 33, v = 1;$<br>$p = 0.722318$ | $a = 742, b = 32, v = 1;$<br>$p = 0.7113151$ | $a = 742, b = 425, v = 11;$<br>$p = 0.9341423$ | $a = 742, b = 72, v = 3;$<br>$p = 0.5198493$ |
