# Supplementary material for: Self-domestication in Homo sapiens: Insights from comparative genomics
Source: PubMed Central journal article supplement (PMC5646786; doi:10.1371/journal.pone.0185306), 2017-10-18
Supplement: pone.0185306.s007.pdf [file pone.0185306.s007.pdf]

**S6 Table. Synteny analysis of the genes overlapping between AMH and domesticated species, and those under selection in multiple domesticated species**

| Gene     | Organism                     | Chromosome | NCBI Accession | Adjacent Protein-coding genes                                                                |
|----------|------------------------------|------------|----------------|----------------------------------------------------------------------------------------------|
| ADAMTS13 | Bos taurus (cattle)          | 11         | AC_000168.1    | ADAMTSL2, TMEM8C, SLC2A6, CACFD1, *, REXO4, STKLD1, SURF4, SURF2                             |
|          | Canis lupus familiaris (dog) | 9          | NC_006591.3    | ADAMTSL2, TMEM8C, SLC2A6, CACFD1, *, REXO4, STKLD1, SURF4, SURF2                             |
|          | Equus caballus (horse)       | 25         | NC_009168.2    | DBH, FAM163B, ADAMTSL2, TMEM8C, *, REXO4, STKLD1, SURF4, SURF2                               |
|          | Felis catus (domestic cat)   | D4         | NC_018735.2    | ADAMTSL2, TMEM8C, SLC2A6, CACFD1, *, REXO4, STKLD1, SURF4, SURF2                             |
|          | Homo sapiens (human)         | 9          | NC_000009.12   | ADAMTSL2, TMEM8C, SLC2A6, CACFD1, *, REXO4, STKLD1, SURF4, SURF2                             |
| AMBRA1   | Bos taurus (cattle)          | 15         | AC_000172.1    | CREB3L1, DGKZ, MDK, CHR4, *, HARBI1, ATG13, ARHGAP1, ZNF408                                  |
|          | Canis lupus familiaris (dog) | 18         | NC_006600.3    | CREB3L1, DGKZ, MDK, CHR4, *, HARBI1, ATG13, ARHGAP1, ZNF408                                  |
|          | Equus caballus (horse)       | 12         | NC_009155.2    | CREB3L1, DGKZ, MDK, CHR4, *, HARBI1, ATG13, ARHGAP1, ZNF408                                  |
|          | Felis catus (domestic cat)   | D1         | NC_018732.2    | CREB3L1, DGKZ, MDK, CHR4, *, HARBI1, ATG13, ARHGAP1, ZNF408                                  |
|          | Homo sapiens (human)         | 11         | NC_000011.10   | CREB3L1, DGKZ, MDK, CHR4, *, HARBI1, ATG13, ARHGAP1, ZNF408                                  |
| ATXN7L1  | Bos taurus (cattle)          | 4          | AC_000161.1    | KMT2E, SRPK2, PUS7, RINT1, *, CDHR3, SYPL1, NAMPT, PIK3CG                                    |
|          | Canis lupus familiaris (dog) | 18         | NC_006600.3    | KMT2E, SRPK2, PUS7, RINT1, *, CDHR3, SYPL1, NAMPT, CCDC71L, PIK3CG                           |
|          | Equus caballus (horse)       | 4          | NC_009147.2    | KMT2E, SRPK2, PUS7, RINT1, EFCAB10, *, CDHR3, SYPL1, NAMPT, PIK3CG                           |
|          | Felis catus (domestic cat)   | A2         | NC_018724.2    | KMT2E, SRPK2, PUS7, RINT1, *, CDHR3, SYPL1, NAMPT, PIK3CG                                    |
|          | Homo sapiens (human)         | 7          | NC_000007.14   | KMT2E, SRPK2, PUS7, RINT1, EFCAB10, *, CDHR3, SYPL1, NAMPT, CCDC71L, PIK3CG                  |
| BRAF     | Bos taurus (cattle)          | 4          | AC_000161.1    | MKRN1, DENND2A, ADCK2, NDUFB2, *, MRPS33, TMEM178B, AGK, KIAA1147                            |
|          | Canis lupus familiaris (dog) | 16         | NC_006598.3    | MKRN1, DENND2A, ADCK2, NDUFB2, *, MRPS33, TMEM178B, AGK, KIAA1147                            |
|          | Equus caballus (horse)       | 4          | NC_009147.2    | MKRN1, DENND2A, ADCK2, NDUFB2, *, MRPS33, TMEM178B, AGK, KIAA1147                            |
|          | Felis catus (domestic cat)   | A2         | NC_018724.2    | MKRN1, DENND2A, ADCK2, NDUFB2, *, MRPS33, TMEM178B, AGK, KIAA1147                            |
|          | Homo sapiens (human)         | 7          | NC_000007.14   | MKRN1, DENND2A, ADCK2, NDUFB2, *, MRPS33, TMEM178B, AGK, KIAA1147                            |
| CACNA1D  | Bos taurus (cattle)          | 22         | AC_000179.1    | SELK, ACTR8, IL17RB, CHDH, *, DCP1A, TKT, PRKCD, RFT1                                        |
|          | Canis lupus familiaris (dog) | 20         | NC_006602.3    | SELK, ACTR8, IL17RB, CHDH, *, DCP1A, TKT, PRKCD, RFT1                                        |
|          | Equus caballus (horse)       | 16         | NC_009159.2    | SELK, ACTR8, IL17RB, CHDH, *, DCP1A, TKT, PRKCD, RFT1                                        |
|          | Felis catus (domestic cat)   | A2         | NC_018724.2    | SELENOK1, ACTR8, IL17RB, CHDH, *, DCP1A, TKT, PRKCD, RFT1                                    |
|          | Homo sapiens (human)         | 3          | NC_000003.12   | SELK, ACTR8, IL17RB, CHDH, *, DCP1A, TKT, PRKCD, RFT1                                        |
| CLEC5A   | Bos taurus (cattle)          | 4          | AC_000161.1    | SSBP1, TAS2R3, TAS2R4, TAS2R5, PRSS37, OR9A4, *, TAS2R38, MGAM, PRSS58, PRSS1                |
|          | Canis lupus familiaris (dog) | 16         | NC_006598.3    | SSBP1, TAS2R3, TAS2R4, TAS2R5, PRSS37, COR9A7, *, TAS2R38, MGAM, MGAM2, PRSS58               |
|          | Equus caballus (horse)       | 4          | NC_009147.2    | SSBP1, TAS2R3, TAS2R4, PRSS37, *, TAS2R38, MGAM, MGAM2, PRSS58                               |
|          | Felis catus (domestic cat)   | A2         | NC_018724.2    | SSBP1, TAS2R3, TAS2R4, TAS2R5, PRSS37, *, TAS2R38, MGAM, MGAM2, PRSS2                        |
|          | Homo sapiens (human)         | 7          | NC_000007.14   | SSBP1, TAS2R3, TAS2R4, TAS2R5, PRSS37, OR9A4, *, TAS2R38, MGAM, MGAM2, PRSS58                |
| COA5     | Bos taurus (cattle)          | 11         | AC_000168.1    | TMEM131, VWA3B, CNGA3, INPP4A, *, UNC50, MGAT4A, KIAA1211L, TSGA10                           |
|          | Canis lupus familiaris (dog) | 10         | NC_006592.3    | TMEM131, VWA3B, CNGA3, INPP4A, *, UNC50, MGAT4A, KIAA1211L, TSGA10                           |
|          | Equus caballus (horse)       | 15         | NC_009158.2    | TSGA10, KIAA1211L, MGAT4A, UNC50, *, INPP4A, CNGA3, VWA3B, TMEM131                           |
|          | Felis catus (domestic cat)   | A3         | NC_018725.2    | TSGA10, KIAA1211L, MGAT4A, UNC50, <sup>2</sup> , INPP4A, CNGA3, VWA3B, TMEM131               |
|          | Homo sapiens (human)         | 2          | NC_000002.12   | TMEM131, VWA3B, CNGA3, INPP4A, *, UNC50, MGAT4A, KIAA1211L, TSGA10                           |
| COL11A1  | Bos taurus (cattle)          | 3          | AC_000160.1    | SLC30A7, DPH5, S1PR1, OLFM3, *, RNPC3, AMY2B, PRMT6, NTNG1, VAV3                             |
|          | Canis lupus familiaris (dog) | 6          | NC_006588.3    | SLC30A7, DPH5, S1PR1, OLFM3, *, RNPC3, PRMT6, NTNG1, VAV3                                    |
|          | Equus caballus (horse)       | 5          | NC_009148.2    | SLC30A7, DPH5, S1PR1, OLFM3, *, RNPC3, PRMT6, NTNG1, VAV3                                    |
|          | Felis catus (domestic cat)   | C1         | NC_018730.2    | SLC30A7, DPH5, S1PR1, OLFM3, *, RNPC3, PRMT6, NTNG1, VAV3                                    |
|          | Homo sapiens (human)         | 1          | NC_000001.11   | SLC30A7, DPH5, S1PR1, OLFM3, *, RNPC3, AMY2B, AMY2A, AMY1A, AMY1B, AMY1C, PRMT6, NTNG1, VAV3 |
| COQ10B   | Bos taurus (cattle)          | 2          | AC_000159.1    | RFTN2, MOB4, HSPE1, HSPD1, *, SF3B1, ANKRD44, PGAP1, C2H2orf66                               |
|          | Canis lupus familiaris (dog) | 37         | NC_006619.3    | RFTN2, MOB4, HSPE1, HSPD1, *, SF3B1, ANKRD44, PGAP1, C3H2orf66                               |
|          | Equus caballus (horse)       | 18         | NC_009161.2    | RFTN2, HSPE1-MOB4, HSPE1, HSPD1, *, SF3B1, ANKRD44, PGAP1, C18H2orf66                        |
|          | Felis catus (domestic cat)   | C1         | NC_018730.2    | MARS2, RFTN2, HSPE1, HSPD1, *, SF3B1, ANKRD44, PGAP1, GTF3C3                                 |
|          | Homo sapiens (human)         | 2          | NC_000002.12   | RFTN2, MOB4, HSPE1, HSPD1, *, SF3B1, ANKRD44, PGAP1, C2orf66                                 |
| DCC      | Bos taurus (cattle)          | 24         | AC_000181.1    | C24H18orf54, STARD6, POLI, MBD2, *, MEX3C, SMAD4, ELAC1, ME2                                 |
|          | Canis lupus familiaris (dog) | 1          | NC_006583.3    | C1H18orf54, STARD6, POLI, MBD2, *, MEX3C, SMAD4, ELAC1, ME2                                  |
|          | Equus caballus (horse)       | 8          | NC_009151.2    | C8H18orf54, STARD6, POLI, MBD2, *, MEX3C, SMAD4, ELAC1, ME2                                  |
|          | Felis catus (domestic cat)   | D3         | NC_018734.2    | CD3H18orf54, STARD6, POLI, MBD2, *, MEX3C, SMAD4, ELAC1, ME2                                 |
|          | Homo sapiens (human)         | 18         | NC_000018.10   | C18orf54, STARD6, POLI, MBD2, *, MEX3C, SMAD4, ELAC1, ME2                                    |
| DLGAP1   | Bos taurus (cattle)          | 24         | AC_000181.1    | MYOM1, MYL12A, MYL12B, TGIF1, *, C24H18orf42, ZBTB14, EPB41L3, TMEM200C                      |
|          | Canis lupus familiaris (dog) | 7          | NC_006589.3    | LPIN2, MYOM1, MYL12B, TGIF1, *, C7H18orf42, ZBTB14, EPB41L3, L3MBTL4                         |
|          | Equus caballus (horse)       | 8          | NC_009151.2    | LPIN2, MYOM1, MYL12A, TGIF1, *, C8H18orf42, ZBTB14, LAMA3, TTC39C                            |
|          | Felis catus (domestic cat)   | D3         | NC_018734.2    | EMILIN2, LPIN2, MYOM1, TGIF1, *, AKAIN1 <sup>3</sup> , ZBTB14, EPB41L3, TMEM200C             |
|          | Homo sapiens (human)         | 18         | NC_000018.10   | MYOM1, MYL12A, MYL12B, TGIF1, *, AKAIN1 <sup>3</sup> , ZBTB14, EPB41L3, TMEM200C             |
| ERBB4    | Bos taurus (cattle)          | 2          | AC_000159.1    | ACADL, MYL1, LANCL1, CPS1, *, IKZF2, SPAG16, VWC2L, BARD1                                    |
|          | Canis lupus familiaris (dog) | 37         | NC_006619.3    | ACADL, MYL1, LANCL1, CPS1, *, IKZF2, SPAG16, VWC2L, BARD1                                    |
|          | Equus caballus (horse)       | 6          | NC_009149.2    | ACADL, MYL1, LANCL1, CPS1, *, IKZF2, SPAG16, VWC2L, BARD1                                    |
|          | Felis catus (domestic cat)   | C1         | NC_018730.2    | ACADL, MYL1, LANCL1, CPS1, *, IKZF2, SPAG16, VWC2L, BARD1                                    |
|          | Homo sapiens (human)         | 2          | NC_000002.12   | ACADL, MYL1, LANCL1, CPS1, *, IKZF2, SPAG16, VWC2L, BARD1                                    |
| FAM172A  | Bos taurus (cattle)          | 7          | AC_000164.1    | ADGRV1, ARRD3, NR2F1, POU5F2, *, KIAA0825, SLF1, MCTP1, FAM81B                               |
|          | Canis lupus familiaris (dog) | 3          | NC_006585.3    | LYSMD3, ADGRV1, ARRD3, NR2F1, *, KIAA0825, SLF1, MCTP1, FAM81B                               |
|          | Equus caballus (horse)       | 14         | NC_009157.2    | ADGRV1, ARRD3, NR2F1, POU5F2, *, KIAA0825, SLF1, MCTP1, FAM81B                               |
|          | Felis catus (domestic cat)   | A1         | NC_018723.2    | ADGRV1, ARRD3, NR2F1, POU5F2, *, KIAA0825, SLF1, MCTP1, FAM81B                               |
|          | Homo sapiens (human)         | 5          | NC_000005.10   | ADGRV1, ARRD3, NR2F1, POU5F2, *, KIAA0825, SLF1, MCTP1, FAM81B                               |
| GGT7     | Bos taurus (cattle)          | 13         | AC_000170.1    | MAP1LC3A, PIGU, TP53INP2, NCOA6, *, ACSS2, GSS, MYH7B, TRPC4AP                               |
|          | Canis lupus familiaris (dog) | 24         | NC_006606.3    | MAP1LC3A, PIGU, TP53INP2, NCOA6, *, ACSS2, GSS, MYH7B, TRPC4AP                               |
|          | Equus caballus (horse)       | 22         | NC_009165.2    | MAP1LC3A, PIGU, TP53INP2, NCOA6, *, ACSS2, GSS, MYH7B, TRPC4AP                               |
|          | Felis catus (domestic cat)   | A3         | NC_018725.2    | MAP1LC3A, PIGU, TP53INP2, NCOA6, *, ACSS2, GSS, MYH7B, TRPC4AP                               |
|          | Homo sapiens (human)         | 20         | NC_000020.11   | MAP1LC3A, PIGU, TP53INP2, NCOA6, *, ACSS2, GSS, MYH7B, TRPC4AP                               |
| GRIA1    | Bos taurus (cattle)          | 7          | AC_000164.1    | SAP30L, HAND1, GALNT10, SMIM15, MFAP3, FAM114A2, *, NMUR2, GLRA1, G3BP1, ATOX1               |
|          | Canis lupus familiaris (dog) | 4          | NC_006586.3    | SAP30L, GALNT10, MFAP3, FAM114A2, *, NMUR2, GLRA1, G3BP1, ATOX1                              |
|          | Equus caballus (horse)       | 14         | NC_009157.2    | SAP30L, GALNT10, MFAP3, FAM114A2, *, NMUR2, GLRA1, G3BP1, ATOX1                              |
|          | Felis catus (domestic cat)   | A1         | NC_018723.2    | SAP30L, GALNT10, MFAP3, FAM114A2, *, NMUR2, GLRA1, G3BP1, ATOX1                              |
|          | Homo sapiens (human)         | 5          | NC_000005.10   | SAP30L, GALNT10, MFAP3, FAM114A2, *, NMUR2, GLRA1, G3BP1, ATOX1                              |
| GRIK3    | Bos taurus (cattle)          | 3          | AC_000160.1    | LSM10, OSCP1, MRPS15, CSF3R, *, ZC3H12A, MEAF6, SNIP1, DNAL1                                 |
|          | Canis lupus familiaris (dog) | 15         | NC_006597.3    | LSM10, OSCP1, MRPS15, CSF3R, *, ZC3H12A, MEAF6, SNIP1, DNAL1                                 |
|          | Equus caballus (horse)       | 2          | NC_009145.2    | LSM10, OSCP1, MRPS15, CSF3R, *, ZC3H12A, MEAF6, SNIP1, DNAL1                                 |
|          | Felis catus (domestic cat)   | C1         | NC_018730.2    | LSM10, OSCP1, MRPS15, CSF3R, *, ZC3H12A, MEAF6, SNIP1, DNAL1                                 |

| Gene                 | Organism                     | Chromosome | NCBI Accession | Adjacent Protein-coding genes                                                                            |
|----------------------|------------------------------|------------|----------------|----------------------------------------------------------------------------------------------------------|
|                      | Homo sapiens (human)         | 1          | NC_000001.11   | LSM10, OSCP1, MRPS15, CSF3R, *, ZC3H12A, MEAF6, SNIP1, DNALI1                                            |
| HSD3B7               | Bos taurus (cattle)          | 25         | AC_000182.1    | ZNF646, ZNF668, STX4, STX1B, *, SETD1A, ORAI3, FBXL19, CTF1                                              |
|                      | Canis lupus familiaris (dog) | 6          | NC_006588.3    | ZNF646, ZNF668, STX4, STX1B, *, SETD1A, ORAI3, FBXL19, CTF1                                              |
|                      | Equus caballus (horse)       | 13         | NC_009156.2    | ZNF646, ZNF668, STX4, STX1B, *, SETD1A, ORAI3, FBXL19, CTF1                                              |
|                      | Felis catus (domestic cat)   | E3         | NC_018738.2    | ZNF646, ZNF668, STX4, STX1B, *, SETD1A, ORAI3, FBXL19, BCL7C                                             |
|                      | Homo sapiens (human)         | 16         | NC_000016.10   | ZNF646, ZNF668, STX4, STX1B, *, SETD1A, ORAI3, FBXL19, CTF1                                              |
| HSPD1                | Bos taurus (cattle)          | 2          | AC_000159.1    | PGAP1, ANKRD44, SF3B1, COQ10B, *, HSPE1, MOB4, RFTN2, MARS2                                              |
|                      | Canis lupus familiaris (dog) | 37         | NC_006619.3    | PGAP1, ANKRD44, SF3B1, COQ10B, *, HSPE1, MOB4, RFTN2, MARS2                                              |
|                      | Equus caballus (horse)       | 18         | NC_009161.2    | PGAP1, ANKRD44, SF3B1, COQ10B, *, HSPE1, HSPE1-MOB4, RFTN2, MARS2                                        |
|                      | Felis catus (domestic cat)   | C1         | NC_018730.2    | PGAP1, ANKRD44, SF3B1, COQ10B, *, HSPE1, RFTN2, MARS2, BOLL                                              |
|                      | Homo sapiens (human)         | 2          | NC_000002.12   | PGAP1, ANKRD44, SF3B1, COQ10B, *, HSPE1, MOB4, RFTN2, MARS2                                              |
| HSPE1                | Bos taurus (cattle)          | 2          | AC_000159.1    | BOLL, MARS2, RFTN2, MOB4, *, HSPD1, COQ10B, SF3B1, ANKRD44                                               |
|                      | Canis lupus familiaris (dog) | 37         | NC_006619.3    | BOLL, MARS2, RFTN2, MOB4, *, HSPD1, COQ10B, SF3B1, ANKRD44                                               |
|                      | Equus caballus (horse)       | 18         | NC_009161.2    | BOLL, MARS2, RFTN2, HSPE1-MOB4, *, HSPD1, COQ10B, SF3B1, ANKRD44                                         |
|                      | Felis catus (domestic cat)   | C1         | NC_018730.2    | PLCL1, BOLL, MARS2, RFTN2, *, HSPD1, COQ10B, SF3B1, ANKRD44                                              |
|                      | Homo sapiens (human)         | 2          | NC_000002.12   | BOLL, MARS2, RFTN2, MOB4, *, HSPD1, COQ10B, SF3B1, ANKRD44                                               |
| ITGA9                | Bos taurus (cattle)          | 22         | AC_000179.1    | DLEC1, PLCD1, VILL, CTDSPL, *, C22H3orf35, GOLGA4, DCLK3, TRANK1, EPM2AIP1, MLH1, LRRFIP2                |
|                      | Canis lupus familiaris (dog) | 23         | NC_006605.3    | DLEC1, PLCD1, VILL, CTDSPL, *, C23H3orf35, GOLGA4, LRRFIP2, MLH1, EPM2AIP1, TRANK1, DCLK3                |
|                      | Equus caballus (horse)       | 16         | NC_009159.2    | DLEC1, PLCD1, VILL, CTDSPL, *, C16H3orf35, GOLGA4, LRRFIP2, MLH1, EPM2AIP1, TRANK1, DCLK3                |
|                      | Felis catus (domestic cat)   | C2         | NC_018731.2    | DLEC1, PLCD1, VILL, CTDSPL, *, CC2H3orf35, GOLGA4, LRRFIP2, MLH1, EPM2AIP1, TRANK1, DCLK3                |
|                      | Homo sapiens (human)         | 3          | NC_000003.12   | DLEC1, PLCD1, VILL, CTDSPL, *, C3orf35, GOLGA4, LRRFIP2, MLH1, EPM2AIP1, TRANK1, DCLK3                   |
| LRP1B                | Bos taurus (cattle)          | 2          | AC_000159.1    | THSD7B, HNMT, SPOPL, NXPH2, *, KYNU, ARHGAP15, GTDC1, ZEB2                                               |
|                      | Canis lupus familiaris (dog) | 19         | NC_006601.3    | THSD7B, HNMT, SPOPL, NXPH2, *, KYNU, ARHGAP15, GTDC1, ZEB2                                               |
|                      | Equus caballus (horse)       | 18         | NC_009161.2    | THSD7B, HNMT, SPOPL, NXPH2, *, KYNU, ARHGAP15, GTDC1, ZEB2                                               |
|                      | Felis catus (domestic cat)   | C1         | NC_018730.2    | THSD7B, HNMT, SPOPL, NXPH2, *, KYNU, ARHGAP15, GTDC1, ZEB2                                               |
|                      | Homo sapiens (human)         | 2          | NC_000002.12   | THSD7B, HNMT, SPOPL, NXPH2, *, KYNU, ARHGAP15, GTDC1, ZEB2                                               |
| LYST                 | Bos taurus (cattle)          | 28         | AC_000185.1    | GGPS1, TBCE, B3GALNT2, GNG4, *, NID1, GPR137B, ERO1B, EDARADD                                            |
|                      | Canis lupus familiaris (dog) | 4          | NC_006586.3    | GGPS1, TBCE, B3GALNT2, GNG4, *, NID1, GPR137B, ERO1B, EDARADD                                            |
|                      | Equus caballus (horse)       | 1          | NC_009144.2    | GGPS1, TBCE, B3GALNT2, GNG4, *, NID1, GPR137B, ERO1B, EDARADD                                            |
|                      | Felis catus (domestic cat)   | D2         | NC_018733.2    | GGPS1, TBCE, B3GALNT2, GNG4, *, NID1, GPR137B, ERO1B, EDARADD                                            |
|                      | Homo sapiens (human)         | 1          | NC_000001.11   | GGPS1, TBCE, B3GALNT2, GNG4, *, NID1, GPR137B, ERO1B, EDARADD                                            |
| MOB4                 | Bos taurus (cattle)          | 2          | AC_000159.1    | PLCL1, BOLL, MARS2, RFTN2, *, HSPE1, HSPD1, COQ10B, SF3B1                                                |
|                      | Canis lupus familiaris (dog) | 37         | NC_006619.3    | PLCL1, BOLL, MARS2, RFTN2, *, HSPE1, HSPD1, COQ10B, SF3B1                                                |
|                      | Equus caballus (horse)       | 18         | NC_009161.2    | PLCL1, BOLL, MARS2, RFTN2, *, HSPE1-MOB4, HSPE1, HSPD1, COQ10B, SF3B1                                    |
|                      | Felis catus (domestic cat)   | C1         | NT_289498.1    | PLCL1, BOLL, MARS2, RFTN2, *, HSPE1, HSPD1, COQ10B, SF3B1                                                |
|                      | Homo sapiens (human)         | 2          | NC_000002.12   | PLCL1, BOLL, MARS2, RFTN2, *, HSPE1, HSPD1, COQ10B, SF3B1                                                |
| MYLK3                | Bos taurus (cattle)          | 18         | AC_000175.1    | GAS8, SHCBP1, VPS35, ORC6, *, C18H16orf87, GPT2, DNAJA2, NETO2                                           |
|                      | Canis lupus familiaris (dog) | 15         | NC_006597.3    | ZYG11B, SHCBP1, VPS35, ORC6, *, C22H16orf87, GPT2, CSMD2, HMGB4                                          |
|                      | Equus caballus (horse)       | 3          | NC_009146.2    | SHCBP1, VPS35, ORC6, *, C16orf87, GPT2, DNAJA2, NETO2                                                    |
|                      | Felis catus (domestic cat)   | E2         | NC_018737.2    | VSTM2B, SHCBP1, VPS35, ORC6, *, CE2H16orf87, GPT2, DNAJA2, NETO2                                         |
|                      | Homo sapiens (human)         | 16         | NC_000016.10   | SHCBP1, VPS35, ORC6, *, C16orf87, GPT2, DNAJA2, NETO2                                                    |
| NCOA6                | Bos taurus (cattle)          | 13         | AC_000170.1    | DYNLRB1, MAP1LC3A, PIGU, TP53INP2, *, GGT7, ACSS2, GSS, MYH7B                                            |
|                      | Canis lupus familiaris (dog) | 24         | NC_006606.3    | DYNLRB1, MAP1LC3A, PIGU, TP53INP2, *, GGT7, ACSS2, GSS, MYH7B                                            |
|                      | Equus caballus (horse)       | 22         | NC_009165.2    | DYNLRB1, MAP1LC3A, PIGU, TP53INP2, *, GGT7, ACSS2, GSS, MYH7B                                            |
|                      | Felis catus (domestic cat)   | A3         | NC_018725.2    | DYNLRB1, MAP1LC3A, PIGU, TP53INP2, *, GGT7, ACSS2, GSS, MYH7B                                            |
|                      | Homo sapiens (human)         | 20         | NC_000020.11   | DYNLRB1, MAP1LC3A, PIGU, TP53INP2, *, GGT7, ACSS2, GSS, MYH7B                                            |
| NEK4                 | Bos taurus (cattle)          | 22         | AC_000179.1    | PBRM1, GNL3, GLT8D1, SPCS1, *, ITIH1, ITIH3, ITIH4, MUSTN1, TMEM110, SFMBT1                              |
|                      | Canis lupus familiaris (dog) | 20         | NC_006602.3    | PBRM1, GNL3, GLT8D1, SPCS1, *, ITIH1, SFMBT1, RFT1, PRKCD                                                |
|                      | Equus caballus (horse)       | 16         | NC_009159.2    | PBRM2, GNL3, GLT8D1, SPCS1, *, ITIH1, ITIH3, ITIH4, SFMBT1                                               |
|                      | Felis catus (domestic cat)   | A2         | NC_018724.2    | PBRM1, GNL3, GLT8D1, SPCS1, *, ITIH1, ITIH3, ITIH4, MUSTN1, TMEM110, SFMBT1                              |
|                      | Homo sapiens (human)         | 3          | NC_000003.12   | PBRM1, GNL3, GLT8D1, SPCS1, *, ITIH1, ITIH3, ITIH4, MUSTN1, TMEM110-MUSTN1, TMEM110, SFMBT1              |
| NRG2                 | Bos taurus (cattle)          | 7          | AC_000164.1    | TMEM173, UBE2D2, CXXC5, PSD2, *, PURA, IGIP, CYSTM1, PFDN1                                               |
|                      | Canis lupus familiaris (dog) | 2          | NC_006584.3    | TMEM173, UBE2D2, CXXC5, PSD2, *, PURA, IGIP, CYSTM1, PFDN1                                               |
|                      | Equus caballus (horse)       | 14         | NC_009157.2    | TMEM173, UBE2D2, CXXC5, PSD2, *, IGIP, CYSTM1, PFDN1, HBEFG                                              |
|                      | Felis catus (domestic cat)   | A1         | NC_018723.2    | TMEM173, UBE2D2, CXXC5, PSD2, *, PURA, IGIP, CYSTM1, PFDN1                                               |
|                      | Homo sapiens (human)         | 5          | NC_000005.10   | TMEM173, UBE2D2, CXXC5, PSD2, *, PURA, IGIP, CYSTM1, PFDN1                                               |
| NT5DC2               | Bos taurus (cattle)          | 22         | AC_000179.1    | SEMA3G, TNNC1, NISCH, STAB1, *, SMIM4, PBRM1, GNL3, GLT8D1                                               |
|                      | Canis lupus familiaris (dog) | 20         | NC_006602.3    | SEMA3G, TNNC1, NISCH, STAB1, *, SMIM4, PBRM1, GNL3, GLT8D1                                               |
|                      | Equus caballus (horse)       | 16         | NC_009159.2    | SEMA3G, TNNC1, NISCH, STAB1, *, SMIM4, PBRM1, GNL3, GLT8D1                                               |
|                      | Felis catus (domestic cat)   | A2         | NC_018724.2    | SEMA3G, TNNC1, NISCH, STAB1, *, SMIM4, PBRM1, GNL3, GLT8D1                                               |
|                      | Homo sapiens (human)         | 3          | NC_000003.12   | SEMA3G, TNNC1, NISCH, STAB1, *, SMIM4, PBRM1, GNL3, GLT8D1                                               |
| NTM                  | Bos taurus (cattle)          | 29         | AC_000186.1    | JAM3, IGSF9B, SPATA19, HIST1H4D, OPCML, *, TMEM45B, NFRKB, PRDM10, APLP2, ST14, ZBTB44, ADAMTS8, ADAMT   |
|                      | Canis lupus familiaris (dog) | 5          | NC_006587.3    | JAM3, IGSF9B, SPATA19, OPCML, *, SNX19, ADAMTS15, ADAMTS8, ZBTB44, ST14, APLP2, PRDM10, NFRKB, TMEM45E   |
|                      | Equus caballus (horse)       | 7          | NC_009150.2    | JAM3, IGSF9B, SPATA19, OPCML, *, SNX19, ADAMTS15, ADAMTS8, ZBTB44, ST14, APLP2, PRDM10, NFRKB, TMEM45E   |
|                      | Felis catus (domestic cat)   | D1         | NC_018732.2    | JAM3, IGSF9B, SPATA19, OPCML, *, SNX19, ADAMTS15, ADAMTS8, ZBTB44, ST14, APLP2, PRDM10, NFRKB, TMEM45E   |
|                      | Homo sapiens (human)         | 11         | NC_000011.10   | JAM3, IGSF9B, SPATA19, OPCML, *, SNX19, C11orf44, ADAMTS15, ADAMTS8, ZBTB44, ST14, APLP2, PRDM10, NFRKB, |
| PLAC8L1              | Bos taurus (cattle)          | 7          | AC_000164.1    | KCTD16, PRELID2, GRXCR2, SH3RF2, *, LARS, RBM27, POU4F3, TCERG1                                          |
|                      | Canis lupus familiaris (dog) | 2          | NC_006584.3    | KCTD16, PRELID2, GRXCR2, SH3RF2, *, LARS, RBM27, POU4F3, TCERG1                                          |
|                      | Equus caballus (horse)       | 14         | NC_009157.2    | KCTD16, PRELID2, GRXCR2, SH3RF2, *, LARS, RBM27, POU4F3, TCERG1                                          |
|                      | Felis catus (domestic cat)   | A1         | NC_018723.2    | KCTD16, PRELID2, GRXCR2, SH3RF2, *, LARS, RBM27, POU4F3, TCERG1                                          |
|                      | Homo sapiens (human)         | 5          | NC_000005.10   | KCTD16, PRELID2, GRXCR2, SH3RF2, *, LARS, RBM27, POU4F3, TCERG1                                          |
| PPAP2A<br>(=PLPP1)   | Bos taurus (cattle)          | 20         | AC_000177.1    | MCIDAS, CCNO, DHX29, SKIV2L2, *, SLC38A9, DDX4 IL31RA, IL6ST                                             |
|                      | Canis lupus familiaris (dog) | 2          | NC_006584.3    | MCIDAS, CCNO, DHX29, SKIV2L2, *, SLC38A9, DDX4 IL31RA, IL6ST                                             |
|                      | Equus caballus (horse)       | 21         | NC_009164.2    | MCIDAS, CCNO, DHX29, SKIV2L2, *, SLC38A9, DDX4 IL31RA, IL6ST                                             |
|                      | Felis catus (domestic cat)   | A1         | NC_018723.2    | MCIDAS, CCNO, DHX29, SKIV2L2, *, SLC38A9, DDX4 IL31RA, IL6ST                                             |
|                      | Homo sapiens (human)         | 5          | NC_000005.10   | MCIDAS, CCNO, DHX29, SKIV2L2, *, SLC38A9, DDX4 IL31RA, IL6ST                                             |
| PPAPDC1B<br>(=PLPP5) | Bos taurus (cattle)          | 27         | AC_000184.1    | EIF4EBP1, ASH2L, STAR, LSM1, *, BAG4, WHSC1L1, DDHD2, LETM2, FGFR1, TACC1                                |
|                      | Canis lupus familiaris (dog) | 16         | NC_006598.3    | EIF4EBP1, ASH2L, STAR, LSM1, BAG4, DDHD2, *, WHSC1L1, LETM2, FGFR1, TACC1                                |
|                      | Equus caballus (horse)       | 16         | NC_006598.3    | EIF4EBP1, ASH2L, STAR, LSM1, BAG4, DDHD2, *, WHSC1L1, LETM2, FGFR1, C27H8orf86, TACC1                    |
|                      | Felis catus (domestic cat)   | B1         | NC_018726.2    | EIF4EBP1, ASH2L, STAR, LSM1, BAG4, DDHD2, *, NSD3, LETM2, FGFR1, TACC1                                   |
|                      | Homo sapiens (human)         | 8          | NC_000008.11   | EIF4EBP1, ASH2L, STAR, LSM1, BAG4, DDHD2, *, WHSC1L1, LETM2, FGFR1, C8orf86, TACC1                       |

| Gene                | Organism                     | Chromosome | NCBI Accession | Adjacent Protein-coding genes                                                                   |
|---------------------|------------------------------|------------|----------------|-------------------------------------------------------------------------------------------------|
| PRR11               | Bos taurus (cattle)          | 19         | AC_000176.1    | DHX40, YPEL2, GDPD1, SMG8, *, SKA2, TRIM37, PPM1E, RAD51C                                       |
|                     | Canis lupus familiaris (dog) | 9          | NC_006591.3    | DHX40, YPEL2, GDPD1, SMG8, *, SKA2, TRIM37, PPM1E, RAD51C                                       |
|                     | Equus caballus (horse)       | 11         | NC_009154.2    | DHX40, YPEL2, GDPD1, SMG8, *, SKA2, TRIM37, PPM1E, RAD51C                                       |
|                     | Felis catus (domestic cat)   | E1         | NC_018736.2    | DHX40, YPEL2, GDPD1, SMG8, *, SKA2, TRIM37, PPM1E, RAD51C                                       |
|                     | Homo sapiens (human)         | 17         | NC_000017.11   | DHX40, YPEL2, GDPD1, SMG8, *, SKA2, TRIM37, PPM1E, RAD51C                                       |
| PVRL3<br>(=NECTIN3) | Bos taurus (cattle)          | 1          | AC_000158.1    | PHLDB2, PLCXD2, ZBED2, CD96, *, DPPA4, DPPA2, MORC1, GUCA1C                                     |
|                     | Canis lupus familiaris (dog) | 33         | NC_006615.3    | PHLDB2, PLCXD2, ZBED2, CD96, *, DPPA4, DPPA2, MORC1, GUCA1C                                     |
|                     | Equus caballus (horse)       | 19         | NC_009162.2    | PHLDB2, EIF3F, PLCXD2, ZBED2, CD96, *, DPPA4, DPPA2, MORC1, GUCA1C                              |
|                     | Felis catus (domestic cat)   | C2         | NC_018731.2    | PHLDB2, PLCXD2, ZBED2, CD96, *, DPPA4, DPPA2, MORC1, GUCA1C                                     |
|                     | Homo sapiens (human)         | 3          | NC_000003.12   | PHLDB2, PLCXD2, ZBED2, CD96, *, DPPA4, DPPA2, FLJ22763, MORC1, GUCA1C                           |
| RFTN2               | Bos taurus (cattle)          | 2          | AC_000159.1    | COQ10B, HSPD1, HSPE1, MOB4, *, MARS2, BOLL, PLCL1, SATB2                                        |
|                     | Canis lupus familiaris (dog) | 37         | NC_006619.3    | COQ10B, HSPD1, HSPE1, MOB4, *, MARS2, BOLL, PLCL1, SATB2                                        |
|                     | Equus caballus (horse)       | 18         | NC_009161.2    | COQ10B, HSPD1, HSPE1, HSPE1-MOB4, *, MARS2, BOLL, PLCL1, SATB2                                  |
|                     | Felis catus (domestic cat)   | C1         | NC_018730.2    | SF3B1, COQ10B, HSPD1, HSPE1, *, MARS2, BOLL, PLCL1, SATB2                                       |
|                     | Homo sapiens (human)         | 2          | NC_000002.12   | COQ10B, HSPD1, HSPE1, MOB4, *, MARS2, BOLL, PLCL1, SATB2                                        |
| RNPC3               | Bos taurus (cattle)          | 3          | AC_000160.1    | SLC25A24, VAV3, NTNG1, PRMT6, AMY2B, *, COL11A1, OLFM3, S1PR1, DPH5                             |
|                     | Canis lupus familiaris (dog) | 6          | NC_006588.3    | SLC25A24, VAV3, NTNG1, PRMT6, *, COL11A1, OLFM3, S1PR1, DPH5                                    |
|                     | Equus caballus (horse)       | 5          | NC_009148.2    | SLC25A24, VAV3, NTNG1, PRMT6, *, COL11A1, OLFM3, S1PR1, DPH5                                    |
|                     | Felis catus (domestic cat)   | C1         | NC_018730.2    | SLC25A24, VAV3, NTNG1, PRMT6, *, COL11A1, OLFM3, S1PR1, DPH5                                    |
|                     | Homo sapiens (human)         | 1          | NC_000001.11   | SLC25A24, VAV3, NTNG1, PRMT6, AMY1C, AMY1B, AMY1A, AMY2A, AMY2B, *, COL11A1, OLFM3, S1PR1, DPH5 |
| SEC24A              | Bos taurus (cattle)          | 7          | AC_000164.1    | TXNDC15, C7H5orf24, DDX46, CAMLG, *, SAR1B, JADE2, CDKN2AIPNL, UBE2B                            |
|                     | Canis lupus familiaris (dog) | 11         | NC_006593.3    | TXNDC15, C11H5orf24, DDX46, CAMLG, *, SAR1B, JADE2, CDKN2AIPNL, UBE2B                           |
|                     | Equus caballus (horse)       | 14         | NC_009157.2    | TXNDC15, C14H5orf24, DDX46, CAMLG, *, SAR1B, JADE2, CDKN2AIPNL, UBE2B                           |
|                     | Felis catus (domestic cat)   | A1         | NC_018723.2    | TXNDC15, CA1H5orf24, DDX46, CAMLG, *, SAR1B, JADE2, CDKN2AIPNL, UBE2B                           |
|                     | Homo sapiens (human)         | 5          | NC_000005.10   | TXNDC15, C5orf24, DDX46, CAMLG, *, SAR1B, JADE2, CDKN2AIPNL, UBE2B                              |
| SF3B1               | Bos taurus (cattle)          | 2          | AC_000159.1    | GTF3C3, C2H2orf66, PGAP1, ANKRD44, *, COQ10B, HSPD1, HSPE1, MOB4                                |
|                     | Canis lupus familiaris (dog) | 37         | NC_006619.3    | GTF3C3, C37H2orf66, PGAP1, ANKRD44, *, COQ10B, HSPD1, HSPE1, MOB4                               |
|                     | Equus caballus (horse)       | 18         | NC_009161.2    | GTF3C3, C18H2orf66, PGAP1, ANKRD44, *, COQ10B, HSPD1, HSPE1, HSPE1-MOB4                         |
|                     | Felis catus (domestic cat)   | C1         | NC_018730.2    | CCDC150, GTF3C3, PGAP1, ANKRD44, *, COQ10B, HSPD1, HSPE1, RFTN2                                 |
|                     | Homo sapiens (human)         | 2          | NC_000002.12   | GTF3C3, C2orf66, PGAP1, ANKRD44, *, COQ10B, HSPD1, HSPE1, MOB4                                  |
| SKA2                | Bos taurus (cattle)          | 19         | AC_000176.1    | TEX14, RAD51C, PPM1E, TRIM37, *, PRR11, SMG8, GDPD1, YPEL2                                      |
|                     | Canis lupus familiaris (dog) | 9          | NC_006591.3    | TEX14, RAD51C, PPM1E, TRIM37, *, PRR11, SMG8, GDPD1, YPEL2                                      |
|                     | Equus caballus (horse)       | 11         | NC_009154.2    | TEX14, RAD51C, PPM1E, TRIM37, *, PRR11, SMG8, GDPD1, YPEL2                                      |
|                     | Felis catus (domestic cat)   | E1         | NC_018736.2    | TEX14, RAD51C, PPM1E, TRIM37, *, PRR11, SMG8, GDPD1, YPEL2                                      |
|                     | Homo sapiens (human)         | 17         | NC_000017.11   | TEX14, RAD51C, PPM1E, TRIM37, *, PRR11, SMG8, GDPD1, YPEL2                                      |
| SMG6                | Bos taurus (cattle)          | 19         | AC_000176.1    | RTN4RL1, DPH1, OVCA2, HIC1, *, SRR, TSR1, SGSM2, MNT                                            |
|                     | Canis lupus familiaris (dog) | 9          | NC_006591.3    | RTN4RL1, DPH1, OVCA2, HIC1, *, SRR, SGSM2, TSR1, MNT                                            |
|                     | Equus caballus (horse)       | 11         | NC_009154.2    | RTN4RL1, DPH1, OVCA2, HIC1, *, SRR, TSR1, SGSM2, MNT                                            |
|                     | Felis catus (domestic cat)   | E1         | NC_018736.2    | RTN4RL1, DPH1, OVCA2, HIC1, *, SRR, TSR1, SGSM2, MNT                                            |
|                     | Homo sapiens (human)         | 17         | NC_000017.11   | RTN3RL1, DPH1, OVCA2, HIC1, *, SRR, TSR1, SGSM2, MNT                                            |
| SNRPD1              | Bos taurus (cattle)          | 24         | AC_000181.1    | RBBP8, GATA6, MIB1, ABHD3, *, ESCO1, GREB1L, ROCK1, USP14                                       |
|                     | Canis lupus familiaris (dog) | 7          | NC_006589.3    | RBBP8, GATA6, MIB1, ABHD3, *, ESCO1, GREB1L, ROCK1, USP14                                       |
|                     | Equus caballus (horse)       | 8          | NC_009151.2    | RBBP8, GATA6, MIB1, ABHD3, *, ESCO1, GREB1L, ROCK1, USP14                                       |
|                     | Felis catus (domestic cat)   | D3         | NC_018734.2    | RBBP8, GATA6, MIB1, ABHD3, *, ESCO1, GREB1L, ROCK1, USP14                                       |
|                     | Homo sapiens (human)         | 18         | NC_000018.10   | RBBP8, CTAGE1, GATA6, MIB1, ABHD3, *, ESCO1, GREB1L, ROCK1                                      |
| STAB1               | Bos taurus (cattle)          | 22         | AC_000179.1    | GNL3, PBRM1, SMIM4, NT5DC2, *, NISCH, TNNC1, SEMA3G, PHF7                                       |
|                     | Canis lupus familiaris (dog) | 20         | NC_006602.3    | GNL3, PBRM1, SMIM4, NT5DC2, *, NISCH, TNNC1, SEMA3G, PHF7                                       |
|                     | Equus caballus (horse)       | 16         | NC_009159.2    | GNL3, PBRM1, SMIM4, NT5DC2, *, NISCH, TNNC1, SEMA3G, PHF7                                       |
|                     | Felis catus (domestic cat)   | A2         | NC_018724.2    | GNL3, PBRM1, SMIM4, NT5DC2, *, NISCH, TNNC1, SEMA3G, PHF7                                       |
|                     | Homo sapiens (human)         | 3          | NC_000003.12   | GNL3, PBRM1, SMIM4, NT5DC2, *, NISCH, TNNC1, SEMA3G, PHF7                                       |
| STK10               | Bos taurus (cattle)          | 20         | AC_000177.1    | NPM1, FGF18, SMIM23, FBXW11, *, EFCAB9, UBT2, SH3PXD2B, NEURL1B                                 |
|                     | Canis lupus familiaris (dog) | 4          | NC_006586.3    | NPM1, FGF18, SMIM23, FBXW11, *, EFCAB9, UBT2, SH3PXD2B, NEURL1B                                 |
|                     | Equus caballus (horse)       | 14         | NC_009157.2    | NPM1, FGF18, SMIM23, FBXW11, *, EFCAB9, UBT2, SH3PXD2B, NEURL1B                                 |
|                     | Felis catus (domestic cat)   | A1         | NC_018723.2    | NPM1, FGF18, SMIM23, FBXW11, *, EFCAB9, UBT2, SH3PXD2B, NEURL1B                                 |
|                     | Homo sapiens (human)         | 5          | NC_018723.2    | NPM1, FGF18, SMIM23, FBXW11, *, EFCAB9, UBT2, SH3PXD2B, NEURL1B                                 |
| SYTL1               | Bos taurus (cattle)          | 2          | AC_000159.1    | GPR3, CD164L2, FCN3, MAP3K6, *, WDT1, TMEM222, SLC9A1, FAM46B                                   |
|                     | Canis lupus familiaris (dog) | 2          | NC_006584.3    | GPR3, CD164L2, FCN3, MAP3K6, *, TMEM222, WDT1, SLC9A1, FAM46B                                   |
|                     | Equus caballus (horse)       | 2          | NC_009145.2    | GPR3, CD164L2, FCN3, MAP3K6, *, TMEM222, WDT1, SLC9A1, FAM46B                                   |
|                     | Felis catus (domestic cat)   | C1         | NC_018730.2    | GPR3, CD164L2, FCN3, MAP3K6, *, TMEM222, WDT1, SLC9A1, FAM46B                                   |
|                     | Homo sapiens (human)         | 2          | NC_009145.2    | GPR3, CD164L2, FCN3, MAP3K6, *, TMEM222, WDT1, SLC9A1, FAM46B                                   |
| TAS2R16             | Bos taurus (cattle)          | 4          | AC_000161.1    | FEZF1, RNF133, RNF148, CADPS2, *, SLC13A1, IQUB, NDUFA5, ABS15                                  |
|                     | Canis lupus familiaris (dog) | 14         | NC_006596.3    | FEZF1, RNF133, RNF148, CADPS2, *, SLC13A1, IQUB                                                 |
|                     | Equus caballus (horse)       | 4          | NC_009147.2    | FEZF1, RNF133, RNF148, CADPS2, *, SLC13A1, IQUB, NDUFA5, ABS15                                  |
|                     | Felis catus (domestic cat)   | A2         | NC_018724.2    | FEZF1, RNF133, RNF148, CADPS2, *, SLC13A1, IQUB, NDUFA5, ABS15                                  |
|                     | Homo sapiens (human)         | 7          | NC_000007.14   | FEZF1, RNF133, RNF148, CADPS2, *, SLC13A1, IQUB, NDUFA5, ABS15                                  |
| TEX14               | Bos taurus (cattle)          | 19         | AC_000176.1    | RNF43, HSF5, MTMR4, SEPT4, C19H17orf47, *, RAD51C, PPM1E, TRIM37, SKA2                          |
|                     | Canis lupus familiaris (dog) | 9          | NC_006591.3    | RNF43, HSF5, MTMR4, *, RAD51C, PPM1E, TRIM37, SKA2                                              |
|                     | Equus caballus (horse)       | 11         | NC_009154.2    | RNF43, HSF5, MTMR4, SEPT4, C17orf47, *, RAD51C, PPM1E, TRIM37, SKA2                             |
|                     | Felis catus (domestic cat)   | E1         | NC_018736.2    | RNF43, HSF5, MTMR4, *, RAD51C, PPM1E, TRIM37, SKA2                                              |
|                     | Homo sapiens (human)         | 17         | NC_000017.11   | RNF43, HSF5, MTMR4, SEPT4, C17orf47, *, RAD51C, PPM1E, TRIM37, SKA2                             |
| TMEM132D            | Bos taurus (cattle)          | 17         | AC_000174.1    | PRAME, TMEM132C, SLC15A4, GLT1D1, *, FZD10, PIWIL1, RIMBP2, STX2                                |
|                     | Canis lupus familiaris (dog) | 26         | NC_006608.3    | TMEM132B, TMEM132C, SLC15A4, GLT1D1, *, FZD10, PIWIL1, RIMBP2, STX2                             |
|                     | Equus caballus (horse)       | 8          | NC_009151.2    | TMEM132B, TMEM132C, SLC15A4, GLT1D1, *, FZD10, PIWIL1, RIMBP2, STX2                             |
|                     | Felis catus (domestic cat)   | D3         | NC_018734.2    | AACS, TMEM132C, SLC15A4, GLT1D1, *, FZD10, PIWIL1, RIMBP2, STX2                                 |
|                     | Homo sapiens (human)         | 12         | NC_000012.12   | TMEM132B, TMEM132C, SLC15A4, GLT1D1, *, FZD10, PIWIL1, RIMBP2, STX2                             |
| TP53BP1             | Bos taurus (cattle)          | 21         | AC_000178.1    | LCMT2, ADAL, ZSCAN29, TUBGCP4, *, MAP1A, PPIP5K1, CKMT1B, STRC                                  |
|                     | Canis lupus familiaris (dog) | 30         | NC_006612.3    | LCMT2, ADAL, ZSCAN29, TUBGCP4, *, MAP1A, PPIP5K2, STRC                                          |
|                     | Equus caballus (horse)       | 1          | NC_009144.2    | LCMT2, ADAL, ZSCAN29, TUBGCP4, *, MAP1A, PPIP5K1, CKMT1A, STRC                                  |
|                     | Felis catus (domestic cat)   | B3         | NC_018728.2    | LCMT2, ADAL, ZSCAN29, TUBGCP4, *, MAP1A, PPIP5K1, CKMT1A, STRC                                  |
|                     | Homo sapiens (human)         | 15         | NC_000015.10   | LCMT2, ADAL, ZSCAN29, TUBGCP4, *, MAP1A, PPIP5K1, CKMT1B, STRC                                  |

| Gene    | Organism                     | Chromosome | NCBI Accession | Adjacent Protein-coding genes                                               |
|---------|------------------------------|------------|----------------|-----------------------------------------------------------------------------|
| VEZT    | Bos taurus (cattle)          | 5          | AC_000162.1    | GLYCAM1, MUCL1, USP44, METAP2, *, FGD6, NR2C1, NDUFA12, TMCC3               |
|         | Canis lupus familiaris (dog) | 15         | NC_006597.3    | SNRPF, NTN4, USP44, METAP2, *, FGD6, NR2C1, NDUFA12, TMCC3                  |
|         | Equus caballus (horse)       | 28         | NC_009171.2    | SNRPF, NTN4, USP44, METAP2, *, FGD6, NR2C1, NDUFA12, TMCC3                  |
|         | Felis catus (domestic cat)   | B4         | NC_018729.2    | SNRPF, NTN4, USP44, METAP2, *, FGD6, NR2C1, NDUFA12, TMCC3                  |
|         | Homo sapiens (human)         | 12         | NC_000012.12   | SNRPF, NTN4, USP44, METAP2, *, FGD6, NR2C1, NDUFA12, TMCC3                  |
| ZMYND10 | Bos taurus (cattle)          | 22         | AC_000179.1    | HYAL3, HYAL1, HYAL2, TUSC2, RASSF1, *, NPRL2, CYB561D2, TMEM115, CACNA2D2   |
|         | Canis lupus familiaris (dog) | 20         | NC_006602.3    | HYAL3, HYAL1, HYAL2, TUSC2, RASSF1, *, NPRL2, CYB561D2, TMEM115, CACNA2D2   |
|         | Equus caballus (horse)       | 16         | NC_009159.2    | HYAL3, HYAL1, HYAL2, TUSC2, RASSF1, *, NPRL2, TMEM115, CACNA2D2, C16H3orf18 |
|         | Felis catus (domestic cat)   | A2         | NC_018724.2    | NAT6, HYAL3, TUSC2, RASSF1, *, NPRL2, TMEM115, CACNA2D2, CA2H3orf18         |
|         | Homo sapiens (human)         | 3          | NC_000003.12   | HYAL3, HYAL1, HYAL2, TUSC2, RASSF1, *, NPRL2, CYB561D2, TMEM115, CACNA2D2   |
| ZNF521  | Bos taurus (cattle)          | 26         | NC_007325.6    | CABYR, OSBPL1A, IMPACT, HRH4, *, SS18, PSMA8, TAF4B, KCTD1                  |
|         | Canis lupus familiaris (dog) | 7          | NC_006589.3    | CABYR, OSBPL1A, IMPACT, HRH4, *, SS18, PSMA8, TAF4B, KCTD1                  |
|         | Equus caballus (horse)       | 8          | NC_009151.2    | CABYR, OSBPL1A, IMPACT, HRH4, *, SS18, PSMA8, TAF4B, KCTD1                  |
|         | Felis catus (domestic cat)   | D3         | NC_018734.2    | CABYR, OSBPL1A, IMPACT, HRH4, *, SS18, PSMA8, TAF4B, KCTD1                  |
|         | Homo sapiens (human)         | 18         | NC_000018.10   | CABYR, OSBPL1A, IMPACT, HRH4, *, SS18, PSMA8, TAF4B, KCTD1                  |

#### Notes

<sup>1</sup> SELENOK = SELK

<sup>2</sup> COA5 deleted or absent from the assembly

<sup>3</sup> AKAIN1 = C18orf42

<sup>4</sup> LRP1B deleted or absent from the assembly

<sup>5</sup> MOB4 present as HSPE1-MOB4

<sup>6</sup> MOB4 deleted or absent from the assembly

<sup>7</sup> NSD3 = WHSC1L1

<sup>8</sup> TAS2R16 deleted or absent from the assembly
